# Supplementary material for: Safety of a novel feed ingredient, Algal Oil containing EPA and DHA, in a gestation-lactation-growth feeding study in Beagle dogs
Source: PLoS One. 2019 Jun 3;14(6):e0217794. doi: 10.1371/journal.pone.0217794 (PMC6546231; doi:10.1371/journal.pone.0217794)
Supplement: S4 Table — (XLSX) [file pone.0217794.s004.xlsx]

## Sheet: Sheet1
	_VALUE_	SEX	ACTIVITY	L_ACTIVITY	PARAMETER	L_PARAMETER	OCCASION	L_OCCASION	GROUP	ANIMAL	RESULT_NUMERIC	VALUE_C	QUALITY_FLAG_SYMBOL	P9_PRM_UNIT	REPLACEMENT_FLAG_ABBR	GROUP_PRINT_ORDER	ANIMAL_PRINT_ORDER	RESULT_STRING	COMMENT_TEXT	OUT_OF_RANGE_MARKER	SAMPLE_COMMENT_TEXT	VALUES_ANALYSE	VALUES_REPORT	APP_OR	APP_REP	TBL_OR	TBL_REP	APP_NO	TBL_NO	FIG_NO	PARAM_SEQ	APP_PAGE_NO	TBL_PAGE_NO	PAR_TYPE	RND_FACT	PRM_UNIT
	ABS	F	CCHEM	CLINICAL CHEMISTRY - LACTATION PERIOD	AG	A/G	56	Day 56	1	1501	1.28	1.28				1	1	1.28				ABS	ABS	L	Par	P	Par	23	16	.	52	2	2	N	0.01
	ABS	F	CCHEM	CLINICAL CHEMISTRY - LACTATION PERIOD	AG	A/G	56	Day 56	1	1502	1.29	1.29				1	2	1.29				ABS	ABS	L	Par	P	Par	23	16	.	52	2	2	N	0.01
	ABS	F	CCHEM	CLINICAL CHEMISTRY - LACTATION PERIOD	AG	A/G	56	Day 56	1	1503	1.17	1.17				1	3	1.17				ABS	ABS	L	Par	P	Par	23	16	.	52	2	2	N	0.01
	ABS	F	CCHEM	CLINICAL CHEMISTRY - LACTATION PERIOD	AG	A/G	56	Day 56	1	1504	1.27	1.27				1	4	1.27				ABS	ABS	L	Par	P	Par	23	16	.	52	2	2	N	0.01
	ABS	F	CCHEM	CLINICAL CHEMISTRY - LACTATION PERIOD	AG	A/G	56	Day 56	1	1506	1.38	1.38				1	5	1.38				ABS	ABS	L	Par	P	Par	23	16	.	52	2	2	N	0.01
	ABS	F	CCHEM	CLINICAL CHEMISTRY - LACTATION PERIOD	AG	A/G	56	Day 56	2	2501	1.42	1.42				2	6	1.42				ABS	ABS	L	Par	P	Par	23	16	.	52	2	2	N	0.01
	ABS	F	CCHEM	CLINICAL CHEMISTRY - LACTATION PERIOD	AG	A/G	56	Day 56	2	2503	1.51	1.51				2	7	1.51				ABS	ABS	L	Par	P	Par	23	16	.	52	2	2	N	0.01
	ABS	F	CCHEM	CLINICAL CHEMISTRY - LACTATION PERIOD	AG	A/G	56	Day 56	2	2504	1.6	1.6				2	8	1.6				ABS	ABS	L	Par	P	Par	23	16	.	52	2	2	N	0.01
	ABS	F	CCHEM	CLINICAL CHEMISTRY - LACTATION PERIOD	AG	A/G	56	Day 56	2	2505	1.3	1.3				2	9	1.3				ABS	ABS	L	Par	P	Par	23	16	.	52	2	2	N	0.01
	ABS	F	CCHEM	CLINICAL CHEMISTRY - LACTATION PERIOD	AG	A/G	56	Day 56	3	3501	1.34	1.34				3	11	1.34				ABS	ABS	L	Par	P	Par	23	16	.	52	2	2	N	0.01
	ABS	F	CCHEM	CLINICAL CHEMISTRY - LACTATION PERIOD	AG	A/G	56	Day 56	3	3503	1.38	1.38				3	13	1.38				ABS	ABS	L	Par	P	Par	23	16	.	52	2	2	N	0.01
	ABS	F	CCHEM	CLINICAL CHEMISTRY - LACTATION PERIOD	AG	A/G	56	Day 56	3	3504	1.29	1.29				3	14	1.29				ABS	ABS	L	Par	P	Par	23	16	.	52	2	2	N	0.01
	ABS	F	CCHEM	CLINICAL CHEMISTRY - LACTATION PERIOD	AG	A/G	56	Day 56	3	3505	1.47	1.47				3	15	1.47				ABS	ABS	L	Par	P	Par	23	16	.	52	2	2	N	0.01
	ABS	F	CCHEM	CLINICAL CHEMISTRY - LACTATION PERIOD	AG	A/G	56	Day 56	4	4502	1.43	1.43				4	16	1.43				ABS	ABS	L	Par	P	Par	23	16	.	52	2	2	N	0.01
	ABS	F	CCHEM	CLINICAL CHEMISTRY - LACTATION PERIOD	AG	A/G	56	Day 56	4	4504	1.23	1.23				4	17	1.23				ABS	ABS	L	Par	P	Par	23	16	.	52	2	2	N	0.01
	ABS	F	CCHEM	CLINICAL CHEMISTRY - LACTATION PERIOD	AG	A/G	56	Day 56	4	4505	1.31	1.31				4	18	1.31				ABS	ABS	L	Par	P	Par	23	16	.	52	2	2	N	0.01
	ABS	F	CCHEM	CLINICAL CHEMISTRY - LACTATION PERIOD	AG	A/G	56	Day 56	4	4506	1.27	1.27				4	19	1.27				ABS	ABS	L	Par	P	Par	23	16	.	52	2	2	N	0.01
	ABS	F	CCHEM	CLINICAL CHEMISTRY - LACTATION PERIOD	ALB	ALB	56	Day 56	1	1501	35	35		g/L		1	1	35				ABS	ABS	L	Par	P	Par	23	16	.	44	2	2	N	0.1	g/L
	ABS	F	CCHEM	CLINICAL CHEMISTRY - LACTATION PERIOD	ALB	ALB	56	Day 56	1	1502	35.9	35.9		g/L		1	2	35.9				ABS	ABS	L	Par	P	Par	23	16	.	44	2	2	N	0.1	g/L
	ABS	F	CCHEM	CLINICAL CHEMISTRY - LACTATION PERIOD	ALB	ALB	56	Day 56	1	1503	33.9	33.9		g/L		1	3	33.9				ABS	ABS	L	Par	P	Par	23	16	.	44	2	2	N	0.1	g/L
	ABS	F	CCHEM	CLINICAL CHEMISTRY - LACTATION PERIOD	ALB	ALB	56	Day 56	1	1504	31.5	31.5		g/L		1	4	31.5				ABS	ABS	L	Par	P	Par	23	16	.	44	2	2	N	0.1	g/L
	ABS	F	CCHEM	CLINICAL CHEMISTRY - LACTATION PERIOD	ALB	ALB	56	Day 56	1	1506	35.5	35.5		g/L		1	5	35.5				ABS	ABS	L	Par	P	Par	23	16	.	44	2	2	N	0.1	g/L
	ABS	F	CCHEM	CLINICAL CHEMISTRY - LACTATION PERIOD	ALB	ALB	56	Day 56	2	2501	34.1	34.1		g/L		2	6	34.1				ABS	ABS	L	Par	P	Par	23	16	.	44	2	2	N	0.1	g/L
	ABS	F	CCHEM	CLINICAL CHEMISTRY - LACTATION PERIOD	ALB	ALB	56	Day 56	2	2503	36.7	36.7		g/L		2	7	36.7				ABS	ABS	L	Par	P	Par	23	16	.	44	2	2	N	0.1	g/L
	ABS	F	CCHEM	CLINICAL CHEMISTRY - LACTATION PERIOD	ALB	ALB	56	Day 56	2	2504	36.6	36.6		g/L		2	8	36.6				ABS	ABS	L	Par	P	Par	23	16	.	44	2	2	N	0.1	g/L
	ABS	F	CCHEM	CLINICAL CHEMISTRY - LACTATION PERIOD	ALB	ALB	56	Day 56	2	2505	34.8	34.8		g/L		2	9	34.8				ABS	ABS	L	Par	P	Par	23	16	.	44	2	2	N	0.1	g/L
	ABS	F	CCHEM	CLINICAL CHEMISTRY - LACTATION PERIOD	ALB	ALB	56	Day 56	3	3501	35.5	35.5		g/L		3	11	35.5				ABS	ABS	L	Par	P	Par	23	16	.	44	2	2	N	0.1	g/L
	ABS	F	CCHEM	CLINICAL CHEMISTRY - LACTATION PERIOD	ALB	ALB	56	Day 56	3	3503	35.2	35.2		g/L		3	13	35.2				ABS	ABS	L	Par	P	Par	23	16	.	44	2	2	N	0.1	g/L
	ABS	F	CCHEM	CLINICAL CHEMISTRY - LACTATION PERIOD	ALB	ALB	56	Day 56	3	3504	33.8	33.8		g/L		3	14	33.8				ABS	ABS	L	Par	P	Par	23	16	.	44	2	2	N	0.1	g/L
	ABS	F	CCHEM	CLINICAL CHEMISTRY - LACTATION PERIOD	ALB	ALB	56	Day 56	3	3505	37.9	37.9		g/L		3	15	37.9				ABS	ABS	L	Par	P	Par	23	16	.	44	2	2	N	0.1	g/L
	ABS	F	CCHEM	CLINICAL CHEMISTRY - LACTATION PERIOD	ALB	ALB	56	Day 56	4	4502	34.9	34.9		g/L		4	16	34.9				ABS	ABS	L	Par	P	Par	23	16	.	44	2	2	N	0.1	g/L
	ABS	F	CCHEM	CLINICAL CHEMISTRY - LACTATION PERIOD	ALB	ALB	56	Day 56	4	4504	32.4	32.4		g/L		4	17	32.4				ABS	ABS	L	Par	P	Par	23	16	.	44	2	2	N	0.1	g/L
	ABS	F	CCHEM	CLINICAL CHEMISTRY - LACTATION PERIOD	ALB	ALB	56	Day 56	4	4505	34.9	34.9		g/L		4	18	34.9				ABS	ABS	L	Par	P	Par	23	16	.	44	2	2	N	0.1	g/L
	ABS	F	CCHEM	CLINICAL CHEMISTRY - LACTATION PERIOD	ALB	ALB	56	Day 56	4	4506	36.1	36.1		g/L		4	19	36.1				ABS	ABS	L	Par	P	Par	23	16	.	44	2	2	N	0.1	g/L
	ABS	F	CCHEM	CLINICAL CHEMISTRY - LACTATION PERIOD	ALP	ALP	56	Day 56	1	1501	66	66		U/L		1	1	66				ABS	ABS	L	Par	P	Par	23	16	.	27	1	1	N	1	U/L
	ABS	F	CCHEM	CLINICAL CHEMISTRY - LACTATION PERIOD	ALP	ALP	56	Day 56	1	1502	187	187		U/L		1	2	187				ABS	ABS	L	Par	P	Par	23	16	.	27	1	1	N	1	U/L
	ABS	F	CCHEM	CLINICAL CHEMISTRY - LACTATION PERIOD	ALP	ALP	56	Day 56	1	1503	93	93		U/L		1	3	93				ABS	ABS	L	Par	P	Par	23	16	.	27	1	1	N	1	U/L
	ABS	F	CCHEM	CLINICAL CHEMISTRY - LACTATION PERIOD	ALP	ALP	56	Day 56	1	1504	49	49		U/L		1	4	49				ABS	ABS	L	Par	P	Par	23	16	.	27	1	1	N	1	U/L
	ABS	F	CCHEM	CLINICAL CHEMISTRY - LACTATION PERIOD	ALP	ALP	56	Day 56	1	1506	93	93		U/L		1	5	93				ABS	ABS	L	Par	P	Par	23	16	.	27	1	1	N	1	U/L
	ABS	F	CCHEM	CLINICAL CHEMISTRY - LACTATION PERIOD	ALP	ALP	56	Day 56	2	2501	82	82		U/L		2	6	82				ABS	ABS	L	Par	P	Par	23	16	.	27	1	1	N	1	U/L
	ABS	F	CCHEM	CLINICAL CHEMISTRY - LACTATION PERIOD	ALP	ALP	56	Day 56	2	2503	120	120		U/L		2	7	120				ABS	ABS	L	Par	P	Par	23	16	.	27	1	1	N	1	U/L
	ABS	F	CCHEM	CLINICAL CHEMISTRY - LACTATION PERIOD	ALP	ALP	56	Day 56	2	2504	77	77		U/L		2	8	77				ABS	ABS	L	Par	P	Par	23	16	.	27	1	1	N	1	U/L
	ABS	F	CCHEM	CLINICAL CHEMISTRY - LACTATION PERIOD	ALP	ALP	56	Day 56	2	2505	118	118		U/L		2	9	118				ABS	ABS	L	Par	P	Par	23	16	.	27	1	1	N	1	U/L
	ABS	F	CCHEM	CLINICAL CHEMISTRY - LACTATION PERIOD	ALP	ALP	56	Day 56	3	3501	131	131		U/L		3	11	131				ABS	ABS	L	Par	P	Par	23	16	.	27	1	1	N	1	U/L
	ABS	F	CCHEM	CLINICAL CHEMISTRY - LACTATION PERIOD	ALP	ALP	56	Day 56	3	3503	60	60		U/L		3	13	60				ABS	ABS	L	Par	P	Par	23	16	.	27	1	1	N	1	U/L
	ABS	F	CCHEM	CLINICAL CHEMISTRY - LACTATION PERIOD	ALP	ALP	56	Day 56	3	3504	77	77		U/L		3	14	77				ABS	ABS	L	Par	P	Par	23	16	.	27	1	1	N	1	U/L
	ABS	F	CCHEM	CLINICAL CHEMISTRY - LACTATION PERIOD	ALP	ALP	56	Day 56	3	3505	98	98		U/L		3	15	98				ABS	ABS	L	Par	P	Par	23	16	.	27	1	1	N	1	U/L
	ABS	F	CCHEM	CLINICAL CHEMISTRY - LACTATION PERIOD	ALP	ALP	56	Day 56	4	4502	68	68		U/L		4	16	68				ABS	ABS	L	Par	P	Par	23	16	.	27	1	1	N	1	U/L
	ABS	F	CCHEM	CLINICAL CHEMISTRY - LACTATION PERIOD	ALP	ALP	56	Day 56	4	4504	92	92		U/L		4	17	92				ABS	ABS	L	Par	P	Par	23	16	.	27	1	1	N	1	U/L
	ABS	F	CCHEM	CLINICAL CHEMISTRY - LACTATION PERIOD	ALP	ALP	56	Day 56	4	4505	80	80		U/L		4	18	80				ABS	ABS	L	Par	P	Par	23	16	.	27	1	1	N	1	U/L
	ABS	F	CCHEM	CLINICAL CHEMISTRY - LACTATION PERIOD	ALP	ALP	56	Day 56	4	4506	83	83		U/L		4	19	83				ABS	ABS	L	Par	P	Par	23	16	.	27	1	1	N	1	U/L
	ABS	F	CCHEM	CLINICAL CHEMISTRY - LACTATION PERIOD	ALT	ALT	56	Day 56	1	1501	28	28		U/L		1	1	28				ABS	ABS	L	Par	P	Par	23	16	.	26	1	1	N	1	U/L
	ABS	F	CCHEM	CLINICAL CHEMISTRY - LACTATION PERIOD	ALT	ALT	56	Day 56	1	1502	26	26		U/L		1	2	26				ABS	ABS	L	Par	P	Par	23	16	.	26	1	1	N	1	U/L
	ABS	F	CCHEM	CLINICAL CHEMISTRY - LACTATION PERIOD	ALT	ALT	56	Day 56	1	1503	51	51		U/L		1	3	51				ABS	ABS	L	Par	P	Par	23	16	.	26	1	1	N	1	U/L
	ABS	F	CCHEM	CLINICAL CHEMISTRY - LACTATION PERIOD	ALT	ALT	56	Day 56	1	1504	31	31		U/L		1	4	31				ABS	ABS	L	Par	P	Par	23	16	.	26	1	1	N	1	U/L
	ABS	F	CCHEM	CLINICAL CHEMISTRY - LACTATION PERIOD	ALT	ALT	56	Day 56	1	1506	26	26		U/L		1	5	26				ABS	ABS	L	Par	P	Par	23	16	.	26	1	1	N	1	U/L
	ABS	F	CCHEM	CLINICAL CHEMISTRY - LACTATION PERIOD	ALT	ALT	56	Day 56	2	2501	31	31		U/L		2	6	31				ABS	ABS	L	Par	P	Par	23	16	.	26	1	1	N	1	U/L
	ABS	F	CCHEM	CLINICAL CHEMISTRY - LACTATION PERIOD	ALT	ALT	56	Day 56	2	2503	33	33		U/L		2	7	33				ABS	ABS	L	Par	P	Par	23	16	.	26	1	1	N	1	U/L
	ABS	F	CCHEM	CLINICAL CHEMISTRY - LACTATION PERIOD	ALT	ALT	56	Day 56	2	2504	30	30		U/L		2	8	30				ABS	ABS	L	Par	P	Par	23	16	.	26	1	1	N	1	U/L
	ABS	F	CCHEM	CLINICAL CHEMISTRY - LACTATION PERIOD	ALT	ALT	56	Day 56	2	2505	77	77		U/L		2	9	77				ABS	ABS	L	Par	P	Par	23	16	.	26	1	1	N	1	U/L
	ABS	F	CCHEM	CLINICAL CHEMISTRY - LACTATION PERIOD	ALT	ALT	56	Day 56	3	3501	28	28		U/L		3	11	28				ABS	ABS	L	Par	P	Par	23	16	.	26	1	1	N	1	U/L
	ABS	F	CCHEM	CLINICAL CHEMISTRY - LACTATION PERIOD	ALT	ALT	56	Day 56	3	3503	39	39		U/L		3	13	39				ABS	ABS	L	Par	P	Par	23	16	.	26	1	1	N	1	U/L
	ABS	F	CCHEM	CLINICAL CHEMISTRY - LACTATION PERIOD	ALT	ALT	56	Day 56	3	3504	30	30		U/L		3	14	30				ABS	ABS	L	Par	P	Par	23	16	.	26	1	1	N	1	U/L
	ABS	F	CCHEM	CLINICAL CHEMISTRY - LACTATION PERIOD	ALT	ALT	56	Day 56	3	3505	27	27		U/L		3	15	27				ABS	ABS	L	Par	P	Par	23	16	.	26	1	1	N	1	U/L
	ABS	F	CCHEM	CLINICAL CHEMISTRY - LACTATION PERIOD	ALT	ALT	56	Day 56	4	4502	35	35		U/L		4	16	35				ABS	ABS	L	Par	P	Par	23	16	.	26	1	1	N	1	U/L
	ABS	F	CCHEM	CLINICAL CHEMISTRY - LACTATION PERIOD	ALT	ALT	56	Day 56	4	4504	36	36		U/L		4	17	36				ABS	ABS	L	Par	P	Par	23	16	.	26	1	1	N	1	U/L
	ABS	F	CCHEM	CLINICAL CHEMISTRY - LACTATION PERIOD	ALT	ALT	56	Day 56	4	4505	32	32		U/L		4	18	32				ABS	ABS	L	Par	P	Par	23	16	.	26	1	1	N	1	U/L
	ABS	F	CCHEM	CLINICAL CHEMISTRY - LACTATION PERIOD	ALT	ALT	56	Day 56	4	4506	40	40		U/L		4	19	40				ABS	ABS	L	Par	P	Par	23	16	.	26	1	1	N	1	U/L
	ABS	F	CCHEM	CLINICAL CHEMISTRY - LACTATION PERIOD	AMYL	AMYL	56	Day 56	1	1501	377	377		U/L		1	1	377				ABS	ABS	L	Par	P	Par	23	16	.	76	3	3	N	1	U/L
	ABS	F	CCHEM	CLINICAL CHEMISTRY - LACTATION PERIOD	AMYL	AMYL	56	Day 56	1	1502	418	418		U/L		1	2	418				ABS	ABS	L	Par	P	Par	23	16	.	76	3	3	N	1	U/L
	ABS	F	CCHEM	CLINICAL CHEMISTRY - LACTATION PERIOD	AMYL	AMYL	56	Day 56	1	1503	398	398		U/L		1	3	398				ABS	ABS	L	Par	P	Par	23	16	.	76	3	3	N	1	U/L
	ABS	F	CCHEM	CLINICAL CHEMISTRY - LACTATION PERIOD	AMYL	AMYL	56	Day 56	1	1504	414	414		U/L		1	4	414				ABS	ABS	L	Par	P	Par	23	16	.	76	3	3	N	1	U/L
	ABS	F	CCHEM	CLINICAL CHEMISTRY - LACTATION PERIOD	AMYL	AMYL	56	Day 56	1	1506	352	352		U/L		1	5	352				ABS	ABS	L	Par	P	Par	23	16	.	76	3	3	N	1	U/L
	ABS	F	CCHEM	CLINICAL CHEMISTRY - LACTATION PERIOD	AMYL	AMYL	56	Day 56	2	2501	435	435		U/L		2	6	435				ABS	ABS	L	Par	P	Par	23	16	.	76	3	3	N	1	U/L
	ABS	F	CCHEM	CLINICAL CHEMISTRY - LACTATION PERIOD	AMYL	AMYL	56	Day 56	2	2503	330	330		U/L		2	7	330				ABS	ABS	L	Par	P	Par	23	16	.	76	3	3	N	1	U/L
	ABS	F	CCHEM	CLINICAL CHEMISTRY - LACTATION PERIOD	AMYL	AMYL	56	Day 56	2	2504	392	392		U/L		2	8	392				ABS	ABS	L	Par	P	Par	23	16	.	76	3	3	N	1	U/L
	ABS	F	CCHEM	CLINICAL CHEMISTRY - LACTATION PERIOD	AMYL	AMYL	56	Day 56	2	2505	401	401		U/L		2	9	401				ABS	ABS	L	Par	P	Par	23	16	.	76	3	3	N	1	U/L
	ABS	F	CCHEM	CLINICAL CHEMISTRY - LACTATION PERIOD	AMYL	AMYL	56	Day 56	3	3501	585	585		U/L		3	11	585				ABS	ABS	L	Par	P	Par	23	16	.	76	3	3	N	1	U/L
	ABS	F	CCHEM	CLINICAL CHEMISTRY - LACTATION PERIOD	AMYL	AMYL	56	Day 56	3	3503	529	529		U/L		3	13	529				ABS	ABS	L	Par	P	Par	23	16	.	76	3	3	N	1	U/L
	ABS	F	CCHEM	CLINICAL CHEMISTRY - LACTATION PERIOD	AMYL	AMYL	56	Day 56	3	3504	407	407		U/L		3	14	407				ABS	ABS	L	Par	P	Par	23	16	.	76	3	3	N	1	U/L
	ABS	F	CCHEM	CLINICAL CHEMISTRY - LACTATION PERIOD	AMYL	AMYL	56	Day 56	3	3505	380	380		U/L		3	15	380				ABS	ABS	L	Par	P	Par	23	16	.	76	3	3	N	1	U/L
	ABS	F	CCHEM	CLINICAL CHEMISTRY - LACTATION PERIOD	AMYL	AMYL	56	Day 56	4	4502	1389	1389		U/L		4	16	1389				ABS	ABS	L	Par	P	Par	23	16	.	76	3	3	N	1	U/L
	ABS	F	CCHEM	CLINICAL CHEMISTRY - LACTATION PERIOD	AMYL	AMYL	56	Day 56	4	4504	752	752		U/L		4	17	752				ABS	ABS	L	Par	P	Par	23	16	.	76	3	3	N	1	U/L
	ABS	F	CCHEM	CLINICAL CHEMISTRY - LACTATION PERIOD	AMYL	AMYL	56	Day 56	4	4505	430	430		U/L		4	18	430				ABS	ABS	L	Par	P	Par	23	16	.	76	3	3	N	1	U/L
	ABS	F	CCHEM	CLINICAL CHEMISTRY - LACTATION PERIOD	AMYL	AMYL	56	Day 56	4	4506	552	552		U/L		4	19	552				ABS	ABS	L	Par	P	Par	23	16	.	76	3	3	N	1	U/L
	ABS	F	CCHEM	CLINICAL CHEMISTRY - LACTATION PERIOD	APPS	APPS	56	Day 56	1	1502	.	HE1				1	2	HE1				ABS	ABS	L	Par	P	Par	23	16	.	24	1	1	R	1
	ABS	F	CCHEM	CLINICAL CHEMISTRY - LACTATION PERIOD	APPS	APPS	56	Day 56	1	1503	.	HE1				1	3	HE1				ABS	ABS	L	Par	P	Par	23	16	.	24	1	1	R	1
	ABS	F	CCHEM	CLINICAL CHEMISTRY - LACTATION PERIOD	APPS	APPS	56	Day 56	1	1504	.	HE1				1	4	HE1				ABS	ABS	L	Par	P	Par	23	16	.	24	1	1	R	1
	ABS	F	CCHEM	CLINICAL CHEMISTRY - LACTATION PERIOD	APPS	APPS	56	Day 56	2	2504	.	HE1				2	8	HE1				ABS	ABS	L	Par	P	Par	23	16	.	24	1	1	R	1
	ABS	F	CCHEM	CLINICAL CHEMISTRY - LACTATION PERIOD	APPS	APPS	56	Day 56	4	4504	.	HE1				4	17	HE1				ABS	ABS	L	Par	P	Par	23	16	.	24	1	1	R	1
	ABS	F	CCHEM	CLINICAL CHEMISTRY - LACTATION PERIOD	AST	AST	56	Day 56	1	1501	24	24		U/L		1	1	24				ABS	ABS	L	Par	P	Par	23	16	.	25	1	1	N	1	U/L
	ABS	F	CCHEM	CLINICAL CHEMISTRY - LACTATION PERIOD	AST	AST	56	Day 56	1	1502	27	27		U/L		1	2	27				ABS	ABS	L	Par	P	Par	23	16	.	25	1	1	N	1	U/L
	ABS	F	CCHEM	CLINICAL CHEMISTRY - LACTATION PERIOD	AST	AST	56	Day 56	1	1503	28	28		U/L		1	3	28				ABS	ABS	L	Par	P	Par	23	16	.	25	1	1	N	1	U/L
	ABS	F	CCHEM	CLINICAL CHEMISTRY - LACTATION PERIOD	AST	AST	56	Day 56	1	1504	31	31		U/L		1	4	31				ABS	ABS	L	Par	P	Par	23	16	.	25	1	1	N	1	U/L
	ABS	F	CCHEM	CLINICAL CHEMISTRY - LACTATION PERIOD	AST	AST	56	Day 56	1	1506	23	23		U/L		1	5	23				ABS	ABS	L	Par	P	Par	23	16	.	25	1	1	N	1	U/L
	ABS	F	CCHEM	CLINICAL CHEMISTRY - LACTATION PERIOD	AST	AST	56	Day 56	2	2501	22	22		U/L		2	6	22				ABS	ABS	L	Par	P	Par	23	16	.	25	1	1	N	1	U/L
	ABS	F	CCHEM	CLINICAL CHEMISTRY - LACTATION PERIOD	AST	AST	56	Day 56	2	2503	30	30		U/L		2	7	30				ABS	ABS	L	Par	P	Par	23	16	.	25	1	1	N	1	U/L
	ABS	F	CCHEM	CLINICAL CHEMISTRY - LACTATION PERIOD	AST	AST	56	Day 56	2	2504	25	25		U/L		2	8	25				ABS	ABS	L	Par	P	Par	23	16	.	25	1	1	N	1	U/L
	ABS	F	CCHEM	CLINICAL CHEMISTRY - LACTATION PERIOD	AST	AST	56	Day 56	2	2505	32	32		U/L		2	9	32				ABS	ABS	L	Par	P	Par	23	16	.	25	1	1	N	1	U/L
	ABS	F	CCHEM	CLINICAL CHEMISTRY - LACTATION PERIOD	AST	AST	56	Day 56	3	3501	24	24		U/L		3	11	24				ABS	ABS	L	Par	P	Par	23	16	.	25	1	1	N	1	U/L
	ABS	F	CCHEM	CLINICAL CHEMISTRY - LACTATION PERIOD	AST	AST	56	Day 56	3	3503	25	25		U/L		3	13	25				ABS	ABS	L	Par	P	Par	23	16	.	25	1	1	N	1	U/L
	ABS	F	CCHEM	CLINICAL CHEMISTRY - LACTATION PERIOD	AST	AST	56	Day 56	3	3504	26	26		U/L		3	14	26				ABS	ABS	L	Par	P	Par	23	16	.	25	1	1	N	1	U/L
	ABS	F	CCHEM	CLINICAL CHEMISTRY - LACTATION PERIOD	AST	AST	56	Day 56	3	3505	22	22		U/L		3	15	22				ABS	ABS	L	Par	P	Par	23	16	.	25	1	1	N	1	U/L
	ABS	F	CCHEM	CLINICAL CHEMISTRY - LACTATION PERIOD	AST	AST	56	Day 56	4	4502	26	26		U/L		4	16	26				ABS	ABS	L	Par	P	Par	23	16	.	25	1	1	N	1	U/L
	ABS	F	CCHEM	CLINICAL CHEMISTRY - LACTATION PERIOD	AST	AST	56	Day 56	4	4504	38	38		U/L		4	17	38				ABS	ABS	L	Par	P	Par	23	16	.	25	1	1	N	1	U/L
	ABS	F	CCHEM	CLINICAL CHEMISTRY - LACTATION PERIOD	AST	AST	56	Day 56	4	4505	28	28		U/L		4	18	28				ABS	ABS	L	Par	P	Par	23	16	.	25	1	1	N	1	U/L
	ABS	F	CCHEM	CLINICAL CHEMISTRY - LACTATION PERIOD	AST	AST	56	Day 56	4	4506	37	37		U/L		4	19	37				ABS	ABS	L	Par	P	Par	23	16	.	25	1	1	N	1	U/L
	ABS	F	CCHEM	CLINICAL CHEMISTRY - LACTATION PERIOD	BILT3	BILT3	56	Day 56	1	1501	.	< 2.2		µmol/L	< 2.2	1	1	< 2.2				ABS	ABS	L	Par	P	Par	23	16	.	29	1	1	N	1	µmol/L
	ABS	F	CCHEM	CLINICAL CHEMISTRY - LACTATION PERIOD	BILT3	BILT3	56	Day 56	1	1502	.	< 2.2		µmol/L	< 2.2	1	2	< 2.2				ABS	ABS	L	Par	P	Par	23	16	.	29	1	1	N	1	µmol/L
	ABS	F	CCHEM	CLINICAL CHEMISTRY - LACTATION PERIOD	BILT3	BILT3	56	Day 56	1	1503	.	< 2.2		µmol/L	< 2.2	1	3	< 2.2				ABS	ABS	L	Par	P	Par	23	16	.	29	1	1	N	1	µmol/L
	ABS	F	CCHEM	CLINICAL CHEMISTRY - LACTATION PERIOD	BILT3	BILT3	56	Day 56	1	1504	.	< 2.2		µmol/L	< 2.2	1	4	< 2.2				ABS	ABS	L	Par	P	Par	23	16	.	29	1	1	N	1	µmol/L
	ABS	F	CCHEM	CLINICAL CHEMISTRY - LACTATION PERIOD	BILT3	BILT3	56	Day 56	1	1506	.	< 2.2		µmol/L	< 2.2	1	5	< 2.2				ABS	ABS	L	Par	P	Par	23	16	.	29	1	1	N	1	µmol/L
	ABS	F	CCHEM	CLINICAL CHEMISTRY - LACTATION PERIOD	BILT3	BILT3	56	Day 56	2	2501	.	< 2.2		µmol/L	< 2.2	2	6	< 2.2				ABS	ABS	L	Par	P	Par	23	16	.	29	1	1	N	1	µmol/L
	ABS	F	CCHEM	CLINICAL CHEMISTRY - LACTATION PERIOD	BILT3	BILT3	56	Day 56	2	2503	.	< 2.2		µmol/L	< 2.2	2	7	< 2.2				ABS	ABS	L	Par	P	Par	23	16	.	29	1	1	N	1	µmol/L
	ABS	F	CCHEM	CLINICAL CHEMISTRY - LACTATION PERIOD	BILT3	BILT3	56	Day 56	2	2504	.	< 2.2		µmol/L	< 2.2	2	8	< 2.2				ABS	ABS	L	Par	P	Par	23	16	.	29	1	1	N	1	µmol/L
	ABS	F	CCHEM	CLINICAL CHEMISTRY - LACTATION PERIOD	BILT3	BILT3	56	Day 56	2	2505	.	< 2.2		µmol/L	< 2.2	2	9	< 2.2				ABS	ABS	L	Par	P	Par	23	16	.	29	1	1	N	1	µmol/L
	ABS	F	CCHEM	CLINICAL CHEMISTRY - LACTATION PERIOD	BILT3	BILT3	56	Day 56	3	3501	.	< 2.2		µmol/L	< 2.2	3	11	< 2.2				ABS	ABS	L	Par	P	Par	23	16	.	29	1	1	N	1	µmol/L
	ABS	F	CCHEM	CLINICAL CHEMISTRY - LACTATION PERIOD	BILT3	BILT3	56	Day 56	3	3503	.	< 2.2		µmol/L	< 2.2	3	13	< 2.2				ABS	ABS	L	Par	P	Par	23	16	.	29	1	1	N	1	µmol/L
	ABS	F	CCHEM	CLINICAL CHEMISTRY - LACTATION PERIOD	BILT3	BILT3	56	Day 56	3	3504	.	< 2.2		µmol/L	< 2.2	3	14	< 2.2				ABS	ABS	L	Par	P	Par	23	16	.	29	1	1	N	1	µmol/L
	ABS	F	CCHEM	CLINICAL CHEMISTRY - LACTATION PERIOD	BILT3	BILT3	56	Day 56	3	3505	.	< 2.2		µmol/L	< 2.2	3	15	< 2.2				ABS	ABS	L	Par	P	Par	23	16	.	29	1	1	N	1	µmol/L
	ABS	F	CCHEM	CLINICAL CHEMISTRY - LACTATION PERIOD	BILT3	BILT3	56	Day 56	4	4502	.	< 2.2		µmol/L	< 2.2	4	16	< 2.2				ABS	ABS	L	Par	P	Par	23	16	.	29	1	1	N	1	µmol/L
	ABS	F	CCHEM	CLINICAL CHEMISTRY - LACTATION PERIOD	BILT3	BILT3	56	Day 56	4	4504	.	< 2.2		µmol/L	< 2.2	4	17	< 2.2				ABS	ABS	L	Par	P	Par	23	16	.	29	1	1	N	1	µmol/L
	ABS	F	CCHEM	CLINICAL CHEMISTRY - LACTATION PERIOD	BILT3	BILT3	56	Day 56	4	4505	.	< 2.2		µmol/L	< 2.2	4	18	< 2.2				ABS	ABS	L	Par	P	Par	23	16	.	29	1	1	N	1	µmol/L
	ABS	F	CCHEM	CLINICAL CHEMISTRY - LACTATION PERIOD	BILT3	BILT3	56	Day 56	4	4506	.	< 2.2		µmol/L	< 2.2	4	19	< 2.2				ABS	ABS	L	Par	P	Par	23	16	.	29	1	1	N	1	µmol/L
	ABS	F	CCHEM	CLINICAL CHEMISTRY - LACTATION PERIOD	CA2	CA	56	Day 56	1	1501	2.53	2.53		mmol/L		1	1	2.53				ABS	ABS	L	Par	P	Par	23	16	.	54	2	2	N	0.01	mmol/L
	ABS	F	CCHEM	CLINICAL CHEMISTRY - LACTATION PERIOD	CA2	CA	56	Day 56	1	1502	2.61	2.61		mmol/L		1	2	2.61				ABS	ABS	L	Par	P	Par	23	16	.	54	2	2	N	0.01	mmol/L
	ABS	F	CCHEM	CLINICAL CHEMISTRY - LACTATION PERIOD	CA2	CA	56	Day 56	1	1503	2.54	2.54		mmol/L		1	3	2.54				ABS	ABS	L	Par	P	Par	23	16	.	54	2	2	N	0.01	mmol/L
	ABS	F	CCHEM	CLINICAL CHEMISTRY - LACTATION PERIOD	CA2	CA	56	Day 56	1	1504	2.56	2.56		mmol/L		1	4	2.56				ABS	ABS	L	Par	P	Par	23	16	.	54	2	2	N	0.01	mmol/L
	ABS	F	CCHEM	CLINICAL CHEMISTRY - LACTATION PERIOD	CA2	CA	56	Day 56	1	1506	2.5	2.5		mmol/L		1	5	2.5				ABS	ABS	L	Par	P	Par	23	16	.	54	2	2	N	0.01	mmol/L
	ABS	F	CCHEM	CLINICAL CHEMISTRY - LACTATION PERIOD	CA2	CA	56	Day 56	2	2501	2.43	2.43		mmol/L		2	6	2.43				ABS	ABS	L	Par	P	Par	23	16	.	54	2	2	N	0.01	mmol/L
	ABS	F	CCHEM	CLINICAL CHEMISTRY - LACTATION PERIOD	CA2	CA	56	Day 56	2	2503	2.46	2.46		mmol/L		2	7	2.46				ABS	ABS	L	Par	P	Par	23	16	.	54	2	2	N	0.01	mmol/L
	ABS	F	CCHEM	CLINICAL CHEMISTRY - LACTATION PERIOD	CA2	CA	56	Day 56	2	2504	2.8	2.8		mmol/L		2	8	2.8				ABS	ABS	L	Par	P	Par	23	16	.	54	2	2	N	0.01	mmol/L
	ABS	F	CCHEM	CLINICAL CHEMISTRY - LACTATION PERIOD	CA2	CA	56	Day 56	2	2505	2.51	2.51		mmol/L		2	9	2.51				ABS	ABS	L	Par	P	Par	23	16	.	54	2	2	N	0.01	mmol/L
	ABS	F	CCHEM	CLINICAL CHEMISTRY - LACTATION PERIOD	CA2	CA	56	Day 56	3	3501	2.46	2.46		mmol/L		3	11	2.46				ABS	ABS	L	Par	P	Par	23	16	.	54	2	2	N	0.01	mmol/L
	ABS	F	CCHEM	CLINICAL CHEMISTRY - LACTATION PERIOD	CA2	CA	56	Day 56	3	3503	2.6	2.6		mmol/L		3	13	2.6				ABS	ABS	L	Par	P	Par	23	16	.	54	2	2	N	0.01	mmol/L
	ABS	F	CCHEM	CLINICAL CHEMISTRY - LACTATION PERIOD	CA2	CA	56	Day 56	3	3504	2.47	2.47		mmol/L		3	14	2.47				ABS	ABS	L	Par	P	Par	23	16	.	54	2	2	N	0.01	mmol/L
	ABS	F	CCHEM	CLINICAL CHEMISTRY - LACTATION PERIOD	CA2	CA	56	Day 56	3	3505	2.62	2.62		mmol/L		3	15	2.62				ABS	ABS	L	Par	P	Par	23	16	.	54	2	2	N	0.01	mmol/L
	ABS	F	CCHEM	CLINICAL CHEMISTRY - LACTATION PERIOD	CA2	CA	56	Day 56	4	4502	2.51	2.51		mmol/L		4	16	2.51				ABS	ABS	L	Par	P	Par	23	16	.	54	2	2	N	0.01	mmol/L
	ABS	F	CCHEM	CLINICAL CHEMISTRY - LACTATION PERIOD	CA2	CA	56	Day 56	4	4504	2.5	2.5		mmol/L		4	17	2.5				ABS	ABS	L	Par	P	Par	23	16	.	54	2	2	N	0.01	mmol/L
	ABS	F	CCHEM	CLINICAL CHEMISTRY - LACTATION PERIOD	CA2	CA	56	Day 56	4	4505	2.52	2.52		mmol/L		4	18	2.52				ABS	ABS	L	Par	P	Par	23	16	.	54	2	2	N	0.01	mmol/L
	ABS	F	CCHEM	CLINICAL CHEMISTRY - LACTATION PERIOD	CA2	CA	56	Day 56	4	4506	2.49	2.49		mmol/L		4	19	2.49				ABS	ABS	L	Par	P	Par	23	16	.	54	2	2	N	0.01	mmol/L
	ABS	F	CCHEM	CLINICAL CHEMISTRY - LACTATION PERIOD	CHOL	CHOL	56	Day 56	1	1501	7.51	7.51		mmol/L		1	1	7.51				ABS	ABS	L	Par	P	Par	23	16	.	31	1	1	N	0.01	mmol/L
	ABS	F	CCHEM	CLINICAL CHEMISTRY - LACTATION PERIOD	CHOL	CHOL	56	Day 56	1	1502	7.39	7.39		mmol/L		1	2	7.39				ABS	ABS	L	Par	P	Par	23	16	.	31	1	1	N	0.01	mmol/L
	ABS	F	CCHEM	CLINICAL CHEMISTRY - LACTATION PERIOD	CHOL	CHOL	56	Day 56	1	1503	6.48	6.48		mmol/L		1	3	6.48				ABS	ABS	L	Par	P	Par	23	16	.	31	1	1	N	0.01	mmol/L
	ABS	F	CCHEM	CLINICAL CHEMISTRY - LACTATION PERIOD	CHOL	CHOL	56	Day 56	1	1504	5.67	5.67		mmol/L		1	4	5.67				ABS	ABS	L	Par	P	Par	23	16	.	31	1	1	N	0.01	mmol/L
	ABS	F	CCHEM	CLINICAL CHEMISTRY - LACTATION PERIOD	CHOL	CHOL	56	Day 56	1	1506	7.65	7.65		mmol/L		1	5	7.65				ABS	ABS	L	Par	P	Par	23	16	.	31	1	1	N	0.01	mmol/L
	ABS	F	CCHEM	CLINICAL CHEMISTRY - LACTATION PERIOD	CHOL	CHOL	56	Day 56	2	2501	6.6	6.6		mmol/L		2	6	6.6				ABS	ABS	L	Par	P	Par	23	16	.	31	1	1	N	0.01	mmol/L
	ABS	F	CCHEM	CLINICAL CHEMISTRY - LACTATION PERIOD	CHOL	CHOL	56	Day 56	2	2503	7.74	7.74		mmol/L		2	7	7.74				ABS	ABS	L	Par	P	Par	23	16	.	31	1	1	N	0.01	mmol/L
	ABS	F	CCHEM	CLINICAL CHEMISTRY - LACTATION PERIOD	CHOL	CHOL	56	Day 56	2	2504	6.24	6.24		mmol/L		2	8	6.24				ABS	ABS	L	Par	P	Par	23	16	.	31	1	1	N	0.01	mmol/L
	ABS	F	CCHEM	CLINICAL CHEMISTRY - LACTATION PERIOD	CHOL	CHOL	56	Day 56	2	2505	6.71	6.71		mmol/L		2	9	6.71				ABS	ABS	L	Par	P	Par	23	16	.	31	1	1	N	0.01	mmol/L
	ABS	F	CCHEM	CLINICAL CHEMISTRY - LACTATION PERIOD	CHOL	CHOL	56	Day 56	3	3501	6.87	6.87		mmol/L		3	11	6.87				ABS	ABS	L	Par	P	Par	23	16	.	31	1	1	N	0.01	mmol/L
	ABS	F	CCHEM	CLINICAL CHEMISTRY - LACTATION PERIOD	CHOL	CHOL	56	Day 56	3	3503	5.03	5.03		mmol/L		3	13	5.03				ABS	ABS	L	Par	P	Par	23	16	.	31	1	1	N	0.01	mmol/L
	ABS	F	CCHEM	CLINICAL CHEMISTRY - LACTATION PERIOD	CHOL	CHOL	56	Day 56	3	3504	6	6		mmol/L		3	14	6				ABS	ABS	L	Par	P	Par	23	16	.	31	1	1	N	0.01	mmol/L
	ABS	F	CCHEM	CLINICAL CHEMISTRY - LACTATION PERIOD	CHOL	CHOL	56	Day 56	3	3505	10.08	10.08		mmol/L		3	15	10.08				ABS	ABS	L	Par	P	Par	23	16	.	31	1	1	N	0.01	mmol/L
	ABS	F	CCHEM	CLINICAL CHEMISTRY - LACTATION PERIOD	CHOL	CHOL	56	Day 56	4	4502	5.53	5.53		mmol/L		4	16	5.53				ABS	ABS	L	Par	P	Par	23	16	.	31	1	1	N	0.01	mmol/L
	ABS	F	CCHEM	CLINICAL CHEMISTRY - LACTATION PERIOD	CHOL	CHOL	56	Day 56	4	4504	4.91	4.91		mmol/L		4	17	4.91				ABS	ABS	L	Par	P	Par	23	16	.	31	1	1	N	0.01	mmol/L
	ABS	F	CCHEM	CLINICAL CHEMISTRY - LACTATION PERIOD	CHOL	CHOL	56	Day 56	4	4505	5.33	5.33		mmol/L		4	18	5.33				ABS	ABS	L	Par	P	Par	23	16	.	31	1	1	N	0.01	mmol/L
	ABS	F	CCHEM	CLINICAL CHEMISTRY - LACTATION PERIOD	CHOL	CHOL	56	Day 56	4	4506	6.91	6.91		mmol/L		4	19	6.91				ABS	ABS	L	Par	P	Par	23	16	.	31	1	1	N	0.01	mmol/L
	ABS	F	CCHEM	CLINICAL CHEMISTRY - LACTATION PERIOD	CK	CK	56	Day 56	1	1501	146	146		U/L		1	1	146				ABS	ABS	L	Par	P	Par	23	16	.	66	3	3	N	1	U/L
	ABS	F	CCHEM	CLINICAL CHEMISTRY - LACTATION PERIOD	CK	CK	56	Day 56	1	1502	176	176		U/L		1	2	176				ABS	ABS	L	Par	P	Par	23	16	.	66	3	3	N	1	U/L
	ABS	F	CCHEM	CLINICAL CHEMISTRY - LACTATION PERIOD	CK	CK	56	Day 56	1	1503	160	160		U/L		1	3	160				ABS	ABS	L	Par	P	Par	23	16	.	66	3	3	N	1	U/L
	ABS	F	CCHEM	CLINICAL CHEMISTRY - LACTATION PERIOD	CK	CK	56	Day 56	1	1504	185	185		U/L		1	4	185				ABS	ABS	L	Par	P	Par	23	16	.	66	3	3	N	1	U/L
	ABS	F	CCHEM	CLINICAL CHEMISTRY - LACTATION PERIOD	CK	CK	56	Day 56	1	1506	102	102		U/L		1	5	102				ABS	ABS	L	Par	P	Par	23	16	.	66	3	3	N	1	U/L
	ABS	F	CCHEM	CLINICAL CHEMISTRY - LACTATION PERIOD	CK	CK	56	Day 56	2	2501	115	115		U/L		2	6	115				ABS	ABS	L	Par	P	Par	23	16	.	66	3	3	N	1	U/L
	ABS	F	CCHEM	CLINICAL CHEMISTRY - LACTATION PERIOD	CK	CK	56	Day 56	2	2503	139	139		U/L		2	7	139				ABS	ABS	L	Par	P	Par	23	16	.	66	3	3	N	1	U/L
	ABS	F	CCHEM	CLINICAL CHEMISTRY - LACTATION PERIOD	CK	CK	56	Day 56	2	2504	231	231		U/L		2	8	231				ABS	ABS	L	Par	P	Par	23	16	.	66	3	3	N	1	U/L
	ABS	F	CCHEM	CLINICAL CHEMISTRY - LACTATION PERIOD	CK	CK	56	Day 56	2	2505	138	138		U/L		2	9	138				ABS	ABS	L	Par	P	Par	23	16	.	66	3	3	N	1	U/L
	ABS	F	CCHEM	CLINICAL CHEMISTRY - LACTATION PERIOD	CK	CK	56	Day 56	3	3501	109	109		U/L		3	11	109				ABS	ABS	L	Par	P	Par	23	16	.	66	3	3	N	1	U/L
	ABS	F	CCHEM	CLINICAL CHEMISTRY - LACTATION PERIOD	CK	CK	56	Day 56	3	3503	93	93		U/L		3	13	93				ABS	ABS	L	Par	P	Par	23	16	.	66	3	3	N	1	U/L
	ABS	F	CCHEM	CLINICAL CHEMISTRY - LACTATION PERIOD	CK	CK	56	Day 56	3	3504	131	131		U/L		3	14	131				ABS	ABS	L	Par	P	Par	23	16	.	66	3	3	N	1	U/L
	ABS	F	CCHEM	CLINICAL CHEMISTRY - LACTATION PERIOD	CK	CK	56	Day 56	3	3505	116	116		U/L		3	15	116				ABS	ABS	L	Par	P	Par	23	16	.	66	3	3	N	1	U/L
	ABS	F	CCHEM	CLINICAL CHEMISTRY - LACTATION PERIOD	CK	CK	56	Day 56	4	4502	113	113		U/L		4	16	113				ABS	ABS	L	Par	P	Par	23	16	.	66	3	3	N	1	U/L
	ABS	F	CCHEM	CLINICAL CHEMISTRY - LACTATION PERIOD	CK	CK	56	Day 56	4	4504	182	182		U/L		4	17	182				ABS	ABS	L	Par	P	Par	23	16	.	66	3	3	N	1	U/L
	ABS	F	CCHEM	CLINICAL CHEMISTRY - LACTATION PERIOD	CK	CK	56	Day 56	4	4505	216	216		U/L		4	18	216				ABS	ABS	L	Par	P	Par	23	16	.	66	3	3	N	1	U/L
	ABS	F	CCHEM	CLINICAL CHEMISTRY - LACTATION PERIOD	CK	CK	56	Day 56	4	4506	170	170		U/L		4	19	170				ABS	ABS	L	Par	P	Par	23	16	.	66	3	3	N	1	U/L
	ABS	F	CCHEM	CLINICAL CHEMISTRY - LACTATION PERIOD	CREA	CREA	56	Day 56	1	1501	42	42		µmol/L		1	1	42				ABS	ABS	L	Par	P	Par	23	16	.	39	1	1	N	1	µmol/L
	ABS	F	CCHEM	CLINICAL CHEMISTRY - LACTATION PERIOD	CREA	CREA	56	Day 56	1	1502	46	46		µmol/L		1	2	46				ABS	ABS	L	Par	P	Par	23	16	.	39	1	1	N	1	µmol/L
	ABS	F	CCHEM	CLINICAL CHEMISTRY - LACTATION PERIOD	CREA	CREA	56	Day 56	1	1503	45	45		µmol/L		1	3	45				ABS	ABS	L	Par	P	Par	23	16	.	39	1	1	N	1	µmol/L
	ABS	F	CCHEM	CLINICAL CHEMISTRY - LACTATION PERIOD	CREA	CREA	56	Day 56	1	1504	44	44		µmol/L		1	4	44				ABS	ABS	L	Par	P	Par	23	16	.	39	1	1	N	1	µmol/L
	ABS	F	CCHEM	CLINICAL CHEMISTRY - LACTATION PERIOD	CREA	CREA	56	Day 56	1	1506	53	53		µmol/L		1	5	53				ABS	ABS	L	Par	P	Par	23	16	.	39	1	1	N	1	µmol/L
	ABS	F	CCHEM	CLINICAL CHEMISTRY - LACTATION PERIOD	CREA	CREA	56	Day 56	2	2501	45	45		µmol/L		2	6	45				ABS	ABS	L	Par	P	Par	23	16	.	39	1	1	N	1	µmol/L
	ABS	F	CCHEM	CLINICAL CHEMISTRY - LACTATION PERIOD	CREA	CREA	56	Day 56	2	2503	57	57		µmol/L		2	7	57				ABS	ABS	L	Par	P	Par	23	16	.	39	1	1	N	1	µmol/L
	ABS	F	CCHEM	CLINICAL CHEMISTRY - LACTATION PERIOD	CREA	CREA	56	Day 56	2	2504	55	55		µmol/L		2	8	55				ABS	ABS	L	Par	P	Par	23	16	.	39	1	1	N	1	µmol/L
	ABS	F	CCHEM	CLINICAL CHEMISTRY - LACTATION PERIOD	CREA	CREA	56	Day 56	2	2505	34	34		µmol/L		2	9	34				ABS	ABS	L	Par	P	Par	23	16	.	39	1	1	N	1	µmol/L
	ABS	F	CCHEM	CLINICAL CHEMISTRY - LACTATION PERIOD	CREA	CREA	56	Day 56	3	3501	50	50		µmol/L		3	11	50				ABS	ABS	L	Par	P	Par	23	16	.	39	1	1	N	1	µmol/L
	ABS	F	CCHEM	CLINICAL CHEMISTRY - LACTATION PERIOD	CREA	CREA	56	Day 56	3	3503	71	71		µmol/L		3	13	71				ABS	ABS	L	Par	P	Par	23	16	.	39	1	1	N	1	µmol/L
	ABS	F	CCHEM	CLINICAL CHEMISTRY - LACTATION PERIOD	CREA	CREA	56	Day 56	3	3504	36	36		µmol/L		3	14	36				ABS	ABS	L	Par	P	Par	23	16	.	39	1	1	N	1	µmol/L
	ABS	F	CCHEM	CLINICAL CHEMISTRY - LACTATION PERIOD	CREA	CREA	56	Day 56	3	3505	38	38		µmol/L		3	15	38				ABS	ABS	L	Par	P	Par	23	16	.	39	1	1	N	1	µmol/L
	ABS	F	CCHEM	CLINICAL CHEMISTRY - LACTATION PERIOD	CREA	CREA	56	Day 56	4	4502	39	39		µmol/L		4	16	39				ABS	ABS	L	Par	P	Par	23	16	.	39	1	1	N	1	µmol/L
	ABS	F	CCHEM	CLINICAL CHEMISTRY - LACTATION PERIOD	CREA	CREA	56	Day 56	4	4504	41	41		µmol/L		4	17	41				ABS	ABS	L	Par	P	Par	23	16	.	39	1	1	N	1	µmol/L
	ABS	F	CCHEM	CLINICAL CHEMISTRY - LACTATION PERIOD	CREA	CREA	56	Day 56	4	4505	42	42		µmol/L		4	18	42				ABS	ABS	L	Par	P	Par	23	16	.	39	1	1	N	1	µmol/L
	ABS	F	CCHEM	CLINICAL CHEMISTRY - LACTATION PERIOD	CREA	CREA	56	Day 56	4	4506	35	35		µmol/L		4	19	35				ABS	ABS	L	Par	P	Par	23	16	.	39	1	1	N	1	µmol/L
	ABS	F	CCHEM	CLINICAL CHEMISTRY - LACTATION PERIOD	Cl	Cl	56	Day 56	1	1501	105.4	105		mmol/L		1	1	105				ABS	ABS	L	Par	P	Par	23	16	.	61	2	2	N	1	mmol/L
	ABS	F	CCHEM	CLINICAL CHEMISTRY - LACTATION PERIOD	Cl	Cl	56	Day 56	1	1502	103.8	104		mmol/L		1	2	104				ABS	ABS	L	Par	P	Par	23	16	.	61	2	2	N	1	mmol/L
	ABS	F	CCHEM	CLINICAL CHEMISTRY - LACTATION PERIOD	Cl	Cl	56	Day 56	1	1503	108.5	109		mmol/L		1	3	109				ABS	ABS	L	Par	P	Par	23	16	.	61	2	2	N	1	mmol/L
	ABS	F	CCHEM	CLINICAL CHEMISTRY - LACTATION PERIOD	Cl	Cl	56	Day 56	1	1504	107.9	108		mmol/L		1	4	108				ABS	ABS	L	Par	P	Par	23	16	.	61	2	2	N	1	mmol/L
	ABS	F	CCHEM	CLINICAL CHEMISTRY - LACTATION PERIOD	Cl	Cl	56	Day 56	1	1506	107.5	108		mmol/L		1	5	108				ABS	ABS	L	Par	P	Par	23	16	.	61	2	2	N	1	mmol/L
	ABS	F	CCHEM	CLINICAL CHEMISTRY - LACTATION PERIOD	Cl	Cl	56	Day 56	2	2501	108	108		mmol/L		2	6	108				ABS	ABS	L	Par	P	Par	23	16	.	61	2	2	N	1	mmol/L
	ABS	F	CCHEM	CLINICAL CHEMISTRY - LACTATION PERIOD	Cl	Cl	56	Day 56	2	2503	108.2	108		mmol/L		2	7	108				ABS	ABS	L	Par	P	Par	23	16	.	61	2	2	N	1	mmol/L
	ABS	F	CCHEM	CLINICAL CHEMISTRY - LACTATION PERIOD	Cl	Cl	56	Day 56	2	2504	107.1	107		mmol/L		2	8	107				ABS	ABS	L	Par	P	Par	23	16	.	61	2	2	N	1	mmol/L
	ABS	F	CCHEM	CLINICAL CHEMISTRY - LACTATION PERIOD	Cl	Cl	56	Day 56	2	2505	109	109		mmol/L		2	9	109				ABS	ABS	L	Par	P	Par	23	16	.	61	2	2	N	1	mmol/L
	ABS	F	CCHEM	CLINICAL CHEMISTRY - LACTATION PERIOD	Cl	Cl	56	Day 56	3	3501	107	107		mmol/L		3	11	107				ABS	ABS	L	Par	P	Par	23	16	.	61	2	2	N	1	mmol/L
	ABS	F	CCHEM	CLINICAL CHEMISTRY - LACTATION PERIOD	Cl	Cl	56	Day 56	3	3503	109.6	110		mmol/L		3	13	110				ABS	ABS	L	Par	P	Par	23	16	.	61	2	2	N	1	mmol/L
	ABS	F	CCHEM	CLINICAL CHEMISTRY - LACTATION PERIOD	Cl	Cl	56	Day 56	3	3504	108.1	108		mmol/L		3	14	108				ABS	ABS	L	Par	P	Par	23	16	.	61	2	2	N	1	mmol/L
	ABS	F	CCHEM	CLINICAL CHEMISTRY - LACTATION PERIOD	Cl	Cl	56	Day 56	3	3505	103.5	104		mmol/L		3	15	104				ABS	ABS	L	Par	P	Par	23	16	.	61	2	2	N	1	mmol/L
	ABS	F	CCHEM	CLINICAL CHEMISTRY - LACTATION PERIOD	Cl	Cl	56	Day 56	4	4502	107.9	108		mmol/L		4	16	108				ABS	ABS	L	Par	P	Par	23	16	.	61	2	2	N	1	mmol/L
	ABS	F	CCHEM	CLINICAL CHEMISTRY - LACTATION PERIOD	Cl	Cl	56	Day 56	4	4504	107.8	108		mmol/L		4	17	108				ABS	ABS	L	Par	P	Par	23	16	.	61	2	2	N	1	mmol/L
	ABS	F	CCHEM	CLINICAL CHEMISTRY - LACTATION PERIOD	Cl	Cl	56	Day 56	4	4505	106.3	106		mmol/L		4	18	106				ABS	ABS	L	Par	P	Par	23	16	.	61	2	2	N	1	mmol/L
	ABS	F	CCHEM	CLINICAL CHEMISTRY - LACTATION PERIOD	Cl	Cl	56	Day 56	4	4506	105.8	106		mmol/L		4	19	106				ABS	ABS	L	Par	P	Par	23	16	.	61	2	2	N	1	mmol/L
	ABS	F	CCHEM	CLINICAL CHEMISTRY - LACTATION PERIOD	GGT	GGT	56	Day 56	1	1501	.	<3		U/L	<3	1	1	<3				ABS	ABS	L	Par	P	Par	23	16	.	67	3	3	N	1	U/L
	ABS	F	CCHEM	CLINICAL CHEMISTRY - LACTATION PERIOD	GGT	GGT	56	Day 56	1	1502	.	<3		U/L	<3	1	2	<3				ABS	ABS	L	Par	P	Par	23	16	.	67	3	3	N	1	U/L
	ABS	F	CCHEM	CLINICAL CHEMISTRY - LACTATION PERIOD	GGT	GGT	56	Day 56	1	1503	.	<3		U/L	<3	1	3	<3				ABS	ABS	L	Par	P	Par	23	16	.	67	3	3	N	1	U/L
	ABS	F	CCHEM	CLINICAL CHEMISTRY - LACTATION PERIOD	GGT	GGT	56	Day 56	1	1504	.	<3		U/L	<3	1	4	<3				ABS	ABS	L	Par	P	Par	23	16	.	67	3	3	N	1	U/L
	ABS	F	CCHEM	CLINICAL CHEMISTRY - LACTATION PERIOD	GGT	GGT	56	Day 56	1	1506	.	<3		U/L	<3	1	5	<3				ABS	ABS	L	Par	P	Par	23	16	.	67	3	3	N	1	U/L
	ABS	F	CCHEM	CLINICAL CHEMISTRY - LACTATION PERIOD	GGT	GGT	56	Day 56	2	2501	.	<3		U/L	<3	2	6	<3				ABS	ABS	L	Par	P	Par	23	16	.	67	3	3	N	1	U/L
	ABS	F	CCHEM	CLINICAL CHEMISTRY - LACTATION PERIOD	GGT	GGT	56	Day 56	2	2503	.	<3		U/L	<3	2	7	<3				ABS	ABS	L	Par	P	Par	23	16	.	67	3	3	N	1	U/L
	ABS	F	CCHEM	CLINICAL CHEMISTRY - LACTATION PERIOD	GGT	GGT	56	Day 56	2	2504	.	<3		U/L	<3	2	8	<3				ABS	ABS	L	Par	P	Par	23	16	.	67	3	3	N	1	U/L
	ABS	F	CCHEM	CLINICAL CHEMISTRY - LACTATION PERIOD	GGT	GGT	56	Day 56	2	2505	.	<3		U/L	<3	2	9	<3				ABS	ABS	L	Par	P	Par	23	16	.	67	3	3	N	1	U/L
	ABS	F	CCHEM	CLINICAL CHEMISTRY - LACTATION PERIOD	GGT	GGT	56	Day 56	3	3501	.	<3		U/L	<3	3	11	<3				ABS	ABS	L	Par	P	Par	23	16	.	67	3	3	N	1	U/L
	ABS	F	CCHEM	CLINICAL CHEMISTRY - LACTATION PERIOD	GGT	GGT	56	Day 56	3	3503	.	<3		U/L	<3	3	13	<3				ABS	ABS	L	Par	P	Par	23	16	.	67	3	3	N	1	U/L
	ABS	F	CCHEM	CLINICAL CHEMISTRY - LACTATION PERIOD	GGT	GGT	56	Day 56	3	3504	.	<3		U/L	<3	3	14	<3				ABS	ABS	L	Par	P	Par	23	16	.	67	3	3	N	1	U/L
	ABS	F	CCHEM	CLINICAL CHEMISTRY - LACTATION PERIOD	GGT	GGT	56	Day 56	3	3505	.	<3		U/L	<3	3	15	<3				ABS	ABS	L	Par	P	Par	23	16	.	67	3	3	N	1	U/L
	ABS	F	CCHEM	CLINICAL CHEMISTRY - LACTATION PERIOD	GGT	GGT	56	Day 56	4	4502	.	<3		U/L	<3	4	16	<3				ABS	ABS	L	Par	P	Par	23	16	.	67	3	3	N	1	U/L
	ABS	F	CCHEM	CLINICAL CHEMISTRY - LACTATION PERIOD	GGT	GGT	56	Day 56	4	4504	.	<3		U/L	<3	4	17	<3				ABS	ABS	L	Par	P	Par	23	16	.	67	3	3	N	1	U/L
	ABS	F	CCHEM	CLINICAL CHEMISTRY - LACTATION PERIOD	GGT	GGT	56	Day 56	4	4505	.	<3		U/L	<3	4	18	<3				ABS	ABS	L	Par	P	Par	23	16	.	67	3	3	N	1	U/L
	ABS	F	CCHEM	CLINICAL CHEMISTRY - LACTATION PERIOD	GGT	GGT	56	Day 56	4	4506	.	<3		U/L	<3	4	19	<3				ABS	ABS	L	Par	P	Par	23	16	.	67	3	3	N	1	U/L
	ABS	F	CCHEM	CLINICAL CHEMISTRY - LACTATION PERIOD	GLOB	GLOB	56	Day 56	1	1501	27.3	27.3		g/L		1	1	27.3				ABS	ABS	L	Par	P	Par	23	16	.	48	2	2	N	0.1	g/L
	ABS	F	CCHEM	CLINICAL CHEMISTRY - LACTATION PERIOD	GLOB	GLOB	56	Day 56	1	1502	27.9	27.9		g/L		1	2	27.9				ABS	ABS	L	Par	P	Par	23	16	.	48	2	2	N	0.1	g/L
	ABS	F	CCHEM	CLINICAL CHEMISTRY - LACTATION PERIOD	GLOB	GLOB	56	Day 56	1	1503	28.9	28.9		g/L		1	3	28.9				ABS	ABS	L	Par	P	Par	23	16	.	48	2	2	N	0.1	g/L
	ABS	F	CCHEM	CLINICAL CHEMISTRY - LACTATION PERIOD	GLOB	GLOB	56	Day 56	1	1504	24.8	24.8		g/L		1	4	24.8				ABS	ABS	L	Par	P	Par	23	16	.	48	2	2	N	0.1	g/L
	ABS	F	CCHEM	CLINICAL CHEMISTRY - LACTATION PERIOD	GLOB	GLOB	56	Day 56	1	1506	25.8	25.8		g/L		1	5	25.8				ABS	ABS	L	Par	P	Par	23	16	.	48	2	2	N	0.1	g/L
	ABS	F	CCHEM	CLINICAL CHEMISTRY - LACTATION PERIOD	GLOB	GLOB	56	Day 56	2	2501	24	24		g/L		2	6	24				ABS	ABS	L	Par	P	Par	23	16	.	48	2	2	N	0.1	g/L
	ABS	F	CCHEM	CLINICAL CHEMISTRY - LACTATION PERIOD	GLOB	GLOB	56	Day 56	2	2503	24.3	24.3		g/L		2	7	24.3				ABS	ABS	L	Par	P	Par	23	16	.	48	2	2	N	0.1	g/L
	ABS	F	CCHEM	CLINICAL CHEMISTRY - LACTATION PERIOD	GLOB	GLOB	56	Day 56	2	2504	22.9	22.9		g/L		2	8	22.9				ABS	ABS	L	Par	P	Par	23	16	.	48	2	2	N	0.1	g/L
	ABS	F	CCHEM	CLINICAL CHEMISTRY - LACTATION PERIOD	GLOB	GLOB	56	Day 56	2	2505	26.7	26.7		g/L		2	9	26.7				ABS	ABS	L	Par	P	Par	23	16	.	48	2	2	N	0.1	g/L
	ABS	F	CCHEM	CLINICAL CHEMISTRY - LACTATION PERIOD	GLOB	GLOB	56	Day 56	3	3501	26.5	26.5		g/L		3	11	26.5				ABS	ABS	L	Par	P	Par	23	16	.	48	2	2	N	0.1	g/L
	ABS	F	CCHEM	CLINICAL CHEMISTRY - LACTATION PERIOD	GLOB	GLOB	56	Day 56	3	3503	25.5	25.5		g/L		3	13	25.5				ABS	ABS	L	Par	P	Par	23	16	.	48	2	2	N	0.1	g/L
	ABS	F	CCHEM	CLINICAL CHEMISTRY - LACTATION PERIOD	GLOB	GLOB	56	Day 56	3	3504	26.2	26.2		g/L		3	14	26.2				ABS	ABS	L	Par	P	Par	23	16	.	48	2	2	N	0.1	g/L
	ABS	F	CCHEM	CLINICAL CHEMISTRY - LACTATION PERIOD	GLOB	GLOB	56	Day 56	3	3505	25.7	25.7		g/L		3	15	25.7				ABS	ABS	L	Par	P	Par	23	16	.	48	2	2	N	0.1	g/L
	ABS	F	CCHEM	CLINICAL CHEMISTRY - LACTATION PERIOD	GLOB	GLOB	56	Day 56	4	4502	24.4	24.4		g/L		4	16	24.4				ABS	ABS	L	Par	P	Par	23	16	.	48	2	2	N	0.1	g/L
	ABS	F	CCHEM	CLINICAL CHEMISTRY - LACTATION PERIOD	GLOB	GLOB	56	Day 56	4	4504	26.3	26.3		g/L		4	17	26.3				ABS	ABS	L	Par	P	Par	23	16	.	48	2	2	N	0.1	g/L
	ABS	F	CCHEM	CLINICAL CHEMISTRY - LACTATION PERIOD	GLOB	GLOB	56	Day 56	4	4505	26.6	26.6		g/L		4	18	26.6				ABS	ABS	L	Par	P	Par	23	16	.	48	2	2	N	0.1	g/L
	ABS	F	CCHEM	CLINICAL CHEMISTRY - LACTATION PERIOD	GLOB	GLOB	56	Day 56	4	4506	28.4	28.4		g/L		4	19	28.4				ABS	ABS	L	Par	P	Par	23	16	.	48	2	2	N	0.1	g/L
	ABS	F	CCHEM	CLINICAL CHEMISTRY - LACTATION PERIOD	GLUC	GLUC	56	Day 56	1	1501	5.5	5.5		mmol/L		1	1	5.5				ABS	ABS	L	Par	P	Par	23	16	.	35	1	1	N	0.1	mmol/L
	ABS	F	CCHEM	CLINICAL CHEMISTRY - LACTATION PERIOD	GLUC	GLUC	56	Day 56	1	1502	5.2	5.2		mmol/L		1	2	5.2				ABS	ABS	L	Par	P	Par	23	16	.	35	1	1	N	0.1	mmol/L
	ABS	F	CCHEM	CLINICAL CHEMISTRY - LACTATION PERIOD	GLUC	GLUC	56	Day 56	1	1503	5.6	5.6		mmol/L		1	3	5.6				ABS	ABS	L	Par	P	Par	23	16	.	35	1	1	N	0.1	mmol/L
	ABS	F	CCHEM	CLINICAL CHEMISTRY - LACTATION PERIOD	GLUC	GLUC	56	Day 56	1	1504	5.6	5.6		mmol/L		1	4	5.6				ABS	ABS	L	Par	P	Par	23	16	.	35	1	1	N	0.1	mmol/L
	ABS	F	CCHEM	CLINICAL CHEMISTRY - LACTATION PERIOD	GLUC	GLUC	56	Day 56	1	1506	5.3	5.3		mmol/L		1	5	5.3				ABS	ABS	L	Par	P	Par	23	16	.	35	1	1	N	0.1	mmol/L
	ABS	F	CCHEM	CLINICAL CHEMISTRY - LACTATION PERIOD	GLUC	GLUC	56	Day 56	2	2501	4.8	4.8		mmol/L		2	6	4.8				ABS	ABS	L	Par	P	Par	23	16	.	35	1	1	N	0.1	mmol/L
	ABS	F	CCHEM	CLINICAL CHEMISTRY - LACTATION PERIOD	GLUC	GLUC	56	Day 56	2	2503	4.6	4.6		mmol/L		2	7	4.6				ABS	ABS	L	Par	P	Par	23	16	.	35	1	1	N	0.1	mmol/L
	ABS	F	CCHEM	CLINICAL CHEMISTRY - LACTATION PERIOD	GLUC	GLUC	56	Day 56	2	2504	4.6	4.6		mmol/L		2	8	4.6				ABS	ABS	L	Par	P	Par	23	16	.	35	1	1	N	0.1	mmol/L
	ABS	F	CCHEM	CLINICAL CHEMISTRY - LACTATION PERIOD	GLUC	GLUC	56	Day 56	2	2505	4.9	4.9		mmol/L		2	9	4.9				ABS	ABS	L	Par	P	Par	23	16	.	35	1	1	N	0.1	mmol/L
	ABS	F	CCHEM	CLINICAL CHEMISTRY - LACTATION PERIOD	GLUC	GLUC	56	Day 56	3	3501	5.2	5.2		mmol/L		3	11	5.2				ABS	ABS	L	Par	P	Par	23	16	.	35	1	1	N	0.1	mmol/L
	ABS	F	CCHEM	CLINICAL CHEMISTRY - LACTATION PERIOD	GLUC	GLUC	56	Day 56	3	3503	5.7	5.7		mmol/L		3	13	5.7				ABS	ABS	L	Par	P	Par	23	16	.	35	1	1	N	0.1	mmol/L
	ABS	F	CCHEM	CLINICAL CHEMISTRY - LACTATION PERIOD	GLUC	GLUC	56	Day 56	3	3504	6	6		mmol/L		3	14	6				ABS	ABS	L	Par	P	Par	23	16	.	35	1	1	N	0.1	mmol/L
	ABS	F	CCHEM	CLINICAL CHEMISTRY - LACTATION PERIOD	GLUC	GLUC	56	Day 56	3	3505	6.1	6.1		mmol/L		3	15	6.1				ABS	ABS	L	Par	P	Par	23	16	.	35	1	1	N	0.1	mmol/L
	ABS	F	CCHEM	CLINICAL CHEMISTRY - LACTATION PERIOD	GLUC	GLUC	56	Day 56	4	4502	5.3	5.3		mmol/L		4	16	5.3				ABS	ABS	L	Par	P	Par	23	16	.	35	1	1	N	0.1	mmol/L
	ABS	F	CCHEM	CLINICAL CHEMISTRY - LACTATION PERIOD	GLUC	GLUC	56	Day 56	4	4504	4.9	4.9		mmol/L		4	17	4.9				ABS	ABS	L	Par	P	Par	23	16	.	35	1	1	N	0.1	mmol/L
	ABS	F	CCHEM	CLINICAL CHEMISTRY - LACTATION PERIOD	GLUC	GLUC	56	Day 56	4	4505	6.3	6.3		mmol/L		4	18	6.3				ABS	ABS	L	Par	P	Par	23	16	.	35	1	1	N	0.1	mmol/L
	ABS	F	CCHEM	CLINICAL CHEMISTRY - LACTATION PERIOD	GLUC	GLUC	56	Day 56	4	4506	5.2	5.2		mmol/L		4	19	5.2				ABS	ABS	L	Par	P	Par	23	16	.	35	1	1	N	0.1	mmol/L
	ABS	F	CCHEM	CLINICAL CHEMISTRY - LACTATION PERIOD	K	K	56	Day 56	1	1501	4.54	4.54		mmol/L		1	1	4.54				ABS	ABS	L	Par	P	Par	23	16	.	60	2	2	N	0.01	mmol/L
	ABS	F	CCHEM	CLINICAL CHEMISTRY - LACTATION PERIOD	K	K	56	Day 56	1	1502	4.64	4.64		mmol/L		1	2	4.64				ABS	ABS	L	Par	P	Par	23	16	.	60	2	2	N	0.01	mmol/L
	ABS	F	CCHEM	CLINICAL CHEMISTRY - LACTATION PERIOD	K	K	56	Day 56	1	1503	4.81	4.81		mmol/L		1	3	4.81				ABS	ABS	L	Par	P	Par	23	16	.	60	2	2	N	0.01	mmol/L
	ABS	F	CCHEM	CLINICAL CHEMISTRY - LACTATION PERIOD	K	K	56	Day 56	1	1504	4.34	4.34		mmol/L		1	4	4.34				ABS	ABS	L	Par	P	Par	23	16	.	60	2	2	N	0.01	mmol/L
	ABS	F	CCHEM	CLINICAL CHEMISTRY - LACTATION PERIOD	K	K	56	Day 56	1	1506	4.68	4.68		mmol/L		1	5	4.68				ABS	ABS	L	Par	P	Par	23	16	.	60	2	2	N	0.01	mmol/L
	ABS	F	CCHEM	CLINICAL CHEMISTRY - LACTATION PERIOD	K	K	56	Day 56	2	2501	4.76	4.76		mmol/L		2	6	4.76				ABS	ABS	L	Par	P	Par	23	16	.	60	2	2	N	0.01	mmol/L
	ABS	F	CCHEM	CLINICAL CHEMISTRY - LACTATION PERIOD	K	K	56	Day 56	2	2503	4.3	4.3		mmol/L		2	7	4.3				ABS	ABS	L	Par	P	Par	23	16	.	60	2	2	N	0.01	mmol/L
	ABS	F	CCHEM	CLINICAL CHEMISTRY - LACTATION PERIOD	K	K	56	Day 56	2	2504	5.36	5.36		mmol/L		2	8	5.36				ABS	ABS	L	Par	P	Par	23	16	.	60	2	2	N	0.01	mmol/L
	ABS	F	CCHEM	CLINICAL CHEMISTRY - LACTATION PERIOD	K	K	56	Day 56	2	2505	4.43	4.43		mmol/L		2	9	4.43				ABS	ABS	L	Par	P	Par	23	16	.	60	2	2	N	0.01	mmol/L
	ABS	F	CCHEM	CLINICAL CHEMISTRY - LACTATION PERIOD	K	K	56	Day 56	3	3501	4.59	4.59		mmol/L		3	11	4.59				ABS	ABS	L	Par	P	Par	23	16	.	60	2	2	N	0.01	mmol/L
	ABS	F	CCHEM	CLINICAL CHEMISTRY - LACTATION PERIOD	K	K	56	Day 56	3	3503	4.23	4.23		mmol/L		3	13	4.23				ABS	ABS	L	Par	P	Par	23	16	.	60	2	2	N	0.01	mmol/L
	ABS	F	CCHEM	CLINICAL CHEMISTRY - LACTATION PERIOD	K	K	56	Day 56	3	3504	4.5	4.5		mmol/L		3	14	4.5				ABS	ABS	L	Par	P	Par	23	16	.	60	2	2	N	0.01	mmol/L
	ABS	F	CCHEM	CLINICAL CHEMISTRY - LACTATION PERIOD	K	K	56	Day 56	3	3505	5.24	5.24		mmol/L		3	15	5.24				ABS	ABS	L	Par	P	Par	23	16	.	60	2	2	N	0.01	mmol/L
	ABS	F	CCHEM	CLINICAL CHEMISTRY - LACTATION PERIOD	K	K	56	Day 56	4	4502	4.87	4.87		mmol/L		4	16	4.87				ABS	ABS	L	Par	P	Par	23	16	.	60	2	2	N	0.01	mmol/L
	ABS	F	CCHEM	CLINICAL CHEMISTRY - LACTATION PERIOD	K	K	56	Day 56	4	4504	4.63	4.63		mmol/L		4	17	4.63				ABS	ABS	L	Par	P	Par	23	16	.	60	2	2	N	0.01	mmol/L
	ABS	F	CCHEM	CLINICAL CHEMISTRY - LACTATION PERIOD	K	K	56	Day 56	4	4505	4.63	4.63		mmol/L		4	18	4.63				ABS	ABS	L	Par	P	Par	23	16	.	60	2	2	N	0.01	mmol/L
	ABS	F	CCHEM	CLINICAL CHEMISTRY - LACTATION PERIOD	K	K	56	Day 56	4	4506	4.67	4.67		mmol/L		4	19	4.67				ABS	ABS	L	Par	P	Par	23	16	.	60	2	2	N	0.01	mmol/L
	ABS	F	CCHEM	CLINICAL CHEMISTRY - LACTATION PERIOD	LDHI2	LDHI2	56	Day 56	1	1501	90	90		U/L		1	1	90				ABS	ABS	L	Par	P	Par	23	16	.	65	3	3	N	1	U/L
	ABS	F	CCHEM	CLINICAL CHEMISTRY - LACTATION PERIOD	LDHI2	LDHI2	56	Day 56	1	1502	99	99		U/L		1	2	99				ABS	ABS	L	Par	P	Par	23	16	.	65	3	3	N	1	U/L
	ABS	F	CCHEM	CLINICAL CHEMISTRY - LACTATION PERIOD	LDHI2	LDHI2	56	Day 56	1	1503	87	87		U/L		1	3	87				ABS	ABS	L	Par	P	Par	23	16	.	65	3	3	N	1	U/L
	ABS	F	CCHEM	CLINICAL CHEMISTRY - LACTATION PERIOD	LDHI2	LDHI2	56	Day 56	1	1504	161	161		U/L		1	4	161				ABS	ABS	L	Par	P	Par	23	16	.	65	3	3	N	1	U/L
	ABS	F	CCHEM	CLINICAL CHEMISTRY - LACTATION PERIOD	LDHI2	LDHI2	56	Day 56	1	1506	55	55		U/L		1	5	55				ABS	ABS	L	Par	P	Par	23	16	.	65	3	3	N	1	U/L
	ABS	F	CCHEM	CLINICAL CHEMISTRY - LACTATION PERIOD	LDHI2	LDHI2	56	Day 56	2	2501	125	125		U/L		2	6	125				ABS	ABS	L	Par	P	Par	23	16	.	65	3	3	N	1	U/L
	ABS	F	CCHEM	CLINICAL CHEMISTRY - LACTATION PERIOD	LDHI2	LDHI2	56	Day 56	2	2503	42	42		U/L		2	7	42				ABS	ABS	L	Par	P	Par	23	16	.	65	3	3	N	1	U/L
	ABS	F	CCHEM	CLINICAL CHEMISTRY - LACTATION PERIOD	LDHI2	LDHI2	56	Day 56	2	2504	152	152		U/L		2	8	152				ABS	ABS	L	Par	P	Par	23	16	.	65	3	3	N	1	U/L
	ABS	F	CCHEM	CLINICAL CHEMISTRY - LACTATION PERIOD	LDHI2	LDHI2	56	Day 56	2	2505	59	59		U/L		2	9	59				ABS	ABS	L	Par	P	Par	23	16	.	65	3	3	N	1	U/L
	ABS	F	CCHEM	CLINICAL CHEMISTRY - LACTATION PERIOD	LDHI2	LDHI2	56	Day 56	3	3501	37	37		U/L		3	11	37				ABS	ABS	L	Par	P	Par	23	16	.	65	3	3	N	1	U/L
	ABS	F	CCHEM	CLINICAL CHEMISTRY - LACTATION PERIOD	LDHI2	LDHI2	56	Day 56	3	3503	75	75		U/L		3	13	75				ABS	ABS	L	Par	P	Par	23	16	.	65	3	3	N	1	U/L
	ABS	F	CCHEM	CLINICAL CHEMISTRY - LACTATION PERIOD	LDHI2	LDHI2	56	Day 56	3	3504	45	45		U/L		3	14	45				ABS	ABS	L	Par	P	Par	23	16	.	65	3	3	N	1	U/L
	ABS	F	CCHEM	CLINICAL CHEMISTRY - LACTATION PERIOD	LDHI2	LDHI2	56	Day 56	3	3505	79	79		U/L		3	15	79				ABS	ABS	L	Par	P	Par	23	16	.	65	3	3	N	1	U/L
	ABS	F	CCHEM	CLINICAL CHEMISTRY - LACTATION PERIOD	LDHI2	LDHI2	56	Day 56	4	4502	31	31		U/L		4	16	31				ABS	ABS	L	Par	P	Par	23	16	.	65	3	3	N	1	U/L
	ABS	F	CCHEM	CLINICAL CHEMISTRY - LACTATION PERIOD	LDHI2	LDHI2	56	Day 56	4	4504	164	164		U/L		4	17	164				ABS	ABS	L	Par	P	Par	23	16	.	65	3	3	N	1	U/L
	ABS	F	CCHEM	CLINICAL CHEMISTRY - LACTATION PERIOD	LDHI2	LDHI2	56	Day 56	4	4505	141	141		U/L		4	18	141				ABS	ABS	L	Par	P	Par	23	16	.	65	3	3	N	1	U/L
	ABS	F	CCHEM	CLINICAL CHEMISTRY - LACTATION PERIOD	LDHI2	LDHI2	56	Day 56	4	4506	112	112		U/L		4	19	112				ABS	ABS	L	Par	P	Par	23	16	.	65	3	3	N	1	U/L
	ABS	F	CCHEM	CLINICAL CHEMISTRY - LACTATION PERIOD	MG2	MG	56	Day 56	1	1501	0.8	0.8		mmol/L		1	1	0.8				ABS	ABS	L	Par	P	Par	23	16	.	78	3	3	N	0.01	mmol/L
	ABS	F	CCHEM	CLINICAL CHEMISTRY - LACTATION PERIOD	MG2	MG	56	Day 56	1	1502	0.86	0.86		mmol/L		1	2	0.86				ABS	ABS	L	Par	P	Par	23	16	.	78	3	3	N	0.01	mmol/L
	ABS	F	CCHEM	CLINICAL CHEMISTRY - LACTATION PERIOD	MG2	MG	56	Day 56	1	1503	0.85	0.85		mmol/L		1	3	0.85				ABS	ABS	L	Par	P	Par	23	16	.	78	3	3	N	0.01	mmol/L
	ABS	F	CCHEM	CLINICAL CHEMISTRY - LACTATION PERIOD	MG2	MG	56	Day 56	1	1504	0.8	0.8		mmol/L		1	4	0.8				ABS	ABS	L	Par	P	Par	23	16	.	78	3	3	N	0.01	mmol/L
	ABS	F	CCHEM	CLINICAL CHEMISTRY - LACTATION PERIOD	MG2	MG	56	Day 56	1	1506	0.92	0.92		mmol/L		1	5	0.92				ABS	ABS	L	Par	P	Par	23	16	.	78	3	3	N	0.01	mmol/L
	ABS	F	CCHEM	CLINICAL CHEMISTRY - LACTATION PERIOD	MG2	MG	56	Day 56	2	2501	0.84	0.84		mmol/L		2	6	0.84				ABS	ABS	L	Par	P	Par	23	16	.	78	3	3	N	0.01	mmol/L
	ABS	F	CCHEM	CLINICAL CHEMISTRY - LACTATION PERIOD	MG2	MG	56	Day 56	2	2503	0.9	0.9		mmol/L		2	7	0.9				ABS	ABS	L	Par	P	Par	23	16	.	78	3	3	N	0.01	mmol/L
	ABS	F	CCHEM	CLINICAL CHEMISTRY - LACTATION PERIOD	MG2	MG	56	Day 56	2	2504	0.89	0.89		mmol/L		2	8	0.89				ABS	ABS	L	Par	P	Par	23	16	.	78	3	3	N	0.01	mmol/L
	ABS	F	CCHEM	CLINICAL CHEMISTRY - LACTATION PERIOD	MG2	MG	56	Day 56	2	2505	0.81	0.81		mmol/L		2	9	0.81				ABS	ABS	L	Par	P	Par	23	16	.	78	3	3	N	0.01	mmol/L
	ABS	F	CCHEM	CLINICAL CHEMISTRY - LACTATION PERIOD	MG2	MG	56	Day 56	3	3501	0.82	0.82		mmol/L		3	11	0.82				ABS	ABS	L	Par	P	Par	23	16	.	78	3	3	N	0.01	mmol/L
	ABS	F	CCHEM	CLINICAL CHEMISTRY - LACTATION PERIOD	MG2	MG	56	Day 56	3	3503	0.81	0.81		mmol/L		3	13	0.81				ABS	ABS	L	Par	P	Par	23	16	.	78	3	3	N	0.01	mmol/L
	ABS	F	CCHEM	CLINICAL CHEMISTRY - LACTATION PERIOD	MG2	MG	56	Day 56	3	3504	0.86	0.86		mmol/L		3	14	0.86				ABS	ABS	L	Par	P	Par	23	16	.	78	3	3	N	0.01	mmol/L
	ABS	F	CCHEM	CLINICAL CHEMISTRY - LACTATION PERIOD	MG2	MG	56	Day 56	3	3505	0.83	0.83		mmol/L		3	15	0.83				ABS	ABS	L	Par	P	Par	23	16	.	78	3	3	N	0.01	mmol/L
	ABS	F	CCHEM	CLINICAL CHEMISTRY - LACTATION PERIOD	MG2	MG	56	Day 56	4	4502	0.81	0.81		mmol/L		4	16	0.81				ABS	ABS	L	Par	P	Par	23	16	.	78	3	3	N	0.01	mmol/L
	ABS	F	CCHEM	CLINICAL CHEMISTRY - LACTATION PERIOD	MG2	MG	56	Day 56	4	4504	0.86	0.86		mmol/L		4	17	0.86				ABS	ABS	L	Par	P	Par	23	16	.	78	3	3	N	0.01	mmol/L
	ABS	F	CCHEM	CLINICAL CHEMISTRY - LACTATION PERIOD	MG2	MG	56	Day 56	4	4505	0.86	0.86		mmol/L		4	18	0.86				ABS	ABS	L	Par	P	Par	23	16	.	78	3	3	N	0.01	mmol/L
	ABS	F	CCHEM	CLINICAL CHEMISTRY - LACTATION PERIOD	MG2	MG	56	Day 56	4	4506	0.81	0.81		mmol/L		4	19	0.81				ABS	ABS	L	Par	P	Par	23	16	.	78	3	3	N	0.01	mmol/L
	ABS	F	CCHEM	CLINICAL CHEMISTRY - LACTATION PERIOD	Na	Na	56	Day 56	1	1501	146	146		mmol/L		1	1	146				ABS	ABS	L	Par	P	Par	23	16	.	59	2	2	N	1	mmol/L
	ABS	F	CCHEM	CLINICAL CHEMISTRY - LACTATION PERIOD	Na	Na	56	Day 56	1	1502	146	146		mmol/L		1	2	146				ABS	ABS	L	Par	P	Par	23	16	.	59	2	2	N	1	mmol/L
	ABS	F	CCHEM	CLINICAL CHEMISTRY - LACTATION PERIOD	Na	Na	56	Day 56	1	1503	145	145		mmol/L		1	3	145				ABS	ABS	L	Par	P	Par	23	16	.	59	2	2	N	1	mmol/L
	ABS	F	CCHEM	CLINICAL CHEMISTRY - LACTATION PERIOD	Na	Na	56	Day 56	1	1504	146	146		mmol/L		1	4	146				ABS	ABS	L	Par	P	Par	23	16	.	59	2	2	N	1	mmol/L
	ABS	F	CCHEM	CLINICAL CHEMISTRY - LACTATION PERIOD	Na	Na	56	Day 56	1	1506	148	148		mmol/L		1	5	148				ABS	ABS	L	Par	P	Par	23	16	.	59	2	2	N	1	mmol/L
	ABS	F	CCHEM	CLINICAL CHEMISTRY - LACTATION PERIOD	Na	Na	56	Day 56	2	2501	146	146		mmol/L		2	6	146				ABS	ABS	L	Par	P	Par	23	16	.	59	2	2	N	1	mmol/L
	ABS	F	CCHEM	CLINICAL CHEMISTRY - LACTATION PERIOD	Na	Na	56	Day 56	2	2503	148	148		mmol/L		2	7	148				ABS	ABS	L	Par	P	Par	23	16	.	59	2	2	N	1	mmol/L
	ABS	F	CCHEM	CLINICAL CHEMISTRY - LACTATION PERIOD	Na	Na	56	Day 56	2	2504	149	149		mmol/L		2	8	149				ABS	ABS	L	Par	P	Par	23	16	.	59	2	2	N	1	mmol/L
	ABS	F	CCHEM	CLINICAL CHEMISTRY - LACTATION PERIOD	Na	Na	56	Day 56	2	2505	146	146		mmol/L		2	9	146				ABS	ABS	L	Par	P	Par	23	16	.	59	2	2	N	1	mmol/L
	ABS	F	CCHEM	CLINICAL CHEMISTRY - LACTATION PERIOD	Na	Na	56	Day 56	3	3501	148	148		mmol/L		3	11	148				ABS	ABS	L	Par	P	Par	23	16	.	59	2	2	N	1	mmol/L
	ABS	F	CCHEM	CLINICAL CHEMISTRY - LACTATION PERIOD	Na	Na	56	Day 56	3	3503	150	150		mmol/L		3	13	150				ABS	ABS	L	Par	P	Par	23	16	.	59	2	2	N	1	mmol/L
	ABS	F	CCHEM	CLINICAL CHEMISTRY - LACTATION PERIOD	Na	Na	56	Day 56	3	3504	146	146		mmol/L		3	14	146				ABS	ABS	L	Par	P	Par	23	16	.	59	2	2	N	1	mmol/L
	ABS	F	CCHEM	CLINICAL CHEMISTRY - LACTATION PERIOD	Na	Na	56	Day 56	3	3505	146	146		mmol/L		3	15	146				ABS	ABS	L	Par	P	Par	23	16	.	59	2	2	N	1	mmol/L
	ABS	F	CCHEM	CLINICAL CHEMISTRY - LACTATION PERIOD	Na	Na	56	Day 56	4	4502	146	146		mmol/L		4	16	146				ABS	ABS	L	Par	P	Par	23	16	.	59	2	2	N	1	mmol/L
	ABS	F	CCHEM	CLINICAL CHEMISTRY - LACTATION PERIOD	Na	Na	56	Day 56	4	4504	147	147		mmol/L		4	17	147				ABS	ABS	L	Par	P	Par	23	16	.	59	2	2	N	1	mmol/L
	ABS	F	CCHEM	CLINICAL CHEMISTRY - LACTATION PERIOD	Na	Na	56	Day 56	4	4505	146	146		mmol/L		4	18	146				ABS	ABS	L	Par	P	Par	23	16	.	59	2	2	N	1	mmol/L
	ABS	F	CCHEM	CLINICAL CHEMISTRY - LACTATION PERIOD	Na	Na	56	Day 56	4	4506	146	146		mmol/L		4	19	146				ABS	ABS	L	Par	P	Par	23	16	.	59	2	2	N	1	mmol/L
	ABS	F	CCHEM	CLINICAL CHEMISTRY - LACTATION PERIOD	PHOS	PHOS	56	Day 56	1	1501	0.9	0.9		mmol/L		1	1	0.9				ABS	ABS	L	Par	P	Par	23	16	.	57	2	2	N	0.01	mmol/L
	ABS	F	CCHEM	CLINICAL CHEMISTRY - LACTATION PERIOD	PHOS	PHOS	56	Day 56	1	1502	1.2	1.2		mmol/L		1	2	1.2				ABS	ABS	L	Par	P	Par	23	16	.	57	2	2	N	0.01	mmol/L
	ABS	F	CCHEM	CLINICAL CHEMISTRY - LACTATION PERIOD	PHOS	PHOS	56	Day 56	1	1503	1.17	1.17		mmol/L		1	3	1.17				ABS	ABS	L	Par	P	Par	23	16	.	57	2	2	N	0.01	mmol/L
	ABS	F	CCHEM	CLINICAL CHEMISTRY - LACTATION PERIOD	PHOS	PHOS	56	Day 56	1	1504	1.23	1.23		mmol/L		1	4	1.23				ABS	ABS	L	Par	P	Par	23	16	.	57	2	2	N	0.01	mmol/L
	ABS	F	CCHEM	CLINICAL CHEMISTRY - LACTATION PERIOD	PHOS	PHOS	56	Day 56	1	1506	1.01	1.01		mmol/L		1	5	1.01				ABS	ABS	L	Par	P	Par	23	16	.	57	2	2	N	0.01	mmol/L
	ABS	F	CCHEM	CLINICAL CHEMISTRY - LACTATION PERIOD	PHOS	PHOS	56	Day 56	2	2501	1.09	1.09		mmol/L		2	6	1.09				ABS	ABS	L	Par	P	Par	23	16	.	57	2	2	N	0.01	mmol/L
	ABS	F	CCHEM	CLINICAL CHEMISTRY - LACTATION PERIOD	PHOS	PHOS	56	Day 56	2	2503	1.24	1.24		mmol/L		2	7	1.24				ABS	ABS	L	Par	P	Par	23	16	.	57	2	2	N	0.01	mmol/L
	ABS	F	CCHEM	CLINICAL CHEMISTRY - LACTATION PERIOD	PHOS	PHOS	56	Day 56	2	2504	1.69	1.69		mmol/L		2	8	1.69				ABS	ABS	L	Par	P	Par	23	16	.	57	2	2	N	0.01	mmol/L
	ABS	F	CCHEM	CLINICAL CHEMISTRY - LACTATION PERIOD	PHOS	PHOS	56	Day 56	2	2505	0.94	0.94		mmol/L		2	9	0.94				ABS	ABS	L	Par	P	Par	23	16	.	57	2	2	N	0.01	mmol/L
	ABS	F	CCHEM	CLINICAL CHEMISTRY - LACTATION PERIOD	PHOS	PHOS	56	Day 56	3	3501	1.06	1.06		mmol/L		3	11	1.06				ABS	ABS	L	Par	P	Par	23	16	.	57	2	2	N	0.01	mmol/L
	ABS	F	CCHEM	CLINICAL CHEMISTRY - LACTATION PERIOD	PHOS	PHOS	56	Day 56	3	3503	1.23	1.23		mmol/L		3	13	1.23				ABS	ABS	L	Par	P	Par	23	16	.	57	2	2	N	0.01	mmol/L
	ABS	F	CCHEM	CLINICAL CHEMISTRY - LACTATION PERIOD	PHOS	PHOS	56	Day 56	3	3504	1.15	1.15		mmol/L		3	14	1.15				ABS	ABS	L	Par	P	Par	23	16	.	57	2	2	N	0.01	mmol/L
	ABS	F	CCHEM	CLINICAL CHEMISTRY - LACTATION PERIOD	PHOS	PHOS	56	Day 56	3	3505	0.97	0.97		mmol/L		3	15	0.97				ABS	ABS	L	Par	P	Par	23	16	.	57	2	2	N	0.01	mmol/L
	ABS	F	CCHEM	CLINICAL CHEMISTRY - LACTATION PERIOD	PHOS	PHOS	56	Day 56	4	4502	1.19	1.19		mmol/L		4	16	1.19				ABS	ABS	L	Par	P	Par	23	16	.	57	2	2	N	0.01	mmol/L
	ABS	F	CCHEM	CLINICAL CHEMISTRY - LACTATION PERIOD	PHOS	PHOS	56	Day 56	4	4504	1.12	1.12		mmol/L		4	17	1.12				ABS	ABS	L	Par	P	Par	23	16	.	57	2	2	N	0.01	mmol/L
	ABS	F	CCHEM	CLINICAL CHEMISTRY - LACTATION PERIOD	PHOS	PHOS	56	Day 56	4	4505	1.15	1.15		mmol/L		4	18	1.15				ABS	ABS	L	Par	P	Par	23	16	.	57	2	2	N	0.01	mmol/L
	ABS	F	CCHEM	CLINICAL CHEMISTRY - LACTATION PERIOD	PHOS	PHOS	56	Day 56	4	4506	0.91	0.91		mmol/L		4	19	0.91				ABS	ABS	L	Par	P	Par	23	16	.	57	2	2	N	0.01	mmol/L
	ABS	F	CCHEM	CLINICAL CHEMISTRY - LACTATION PERIOD	TBA	TBA	56	Day 56	1	1501	.	<1.0		µmol/L	<1.0	1	1	<1.0				ABS	ABS	L	Par	P	Par	23	16	.	71	3	3	N	0.1	µmol/L
	ABS	F	CCHEM	CLINICAL CHEMISTRY - LACTATION PERIOD	TBA	TBA	56	Day 56	1	1502	.	<1.0		µmol/L	<1.0	1	2	<1.0				ABS	ABS	L	Par	P	Par	23	16	.	71	3	3	N	0.1	µmol/L
	ABS	F	CCHEM	CLINICAL CHEMISTRY - LACTATION PERIOD	TBA	TBA	56	Day 56	1	1503	1.5	1.5		µmol/L		1	3	1.5				ABS	ABS	L	Par	P	Par	23	16	.	71	3	3	N	0.1	µmol/L
	ABS	F	CCHEM	CLINICAL CHEMISTRY - LACTATION PERIOD	TBA	TBA	56	Day 56	1	1504	1.9	1.9		µmol/L		1	4	1.9				ABS	ABS	L	Par	P	Par	23	16	.	71	3	3	N	0.1	µmol/L
	ABS	F	CCHEM	CLINICAL CHEMISTRY - LACTATION PERIOD	TBA	TBA	56	Day 56	1	1506	.	<1.0		µmol/L	<1.0	1	5	<1.0				ABS	ABS	L	Par	P	Par	23	16	.	71	3	3	N	0.1	µmol/L
	ABS	F	CCHEM	CLINICAL CHEMISTRY - LACTATION PERIOD	TBA	TBA	56	Day 56	2	2501	.	<1.0		µmol/L	<1.0	2	6	<1.0				ABS	ABS	L	Par	P	Par	23	16	.	71	3	3	N	0.1	µmol/L
	ABS	F	CCHEM	CLINICAL CHEMISTRY - LACTATION PERIOD	TBA	TBA	56	Day 56	2	2503	.	<1.0		µmol/L	<1.0	2	7	<1.0				ABS	ABS	L	Par	P	Par	23	16	.	71	3	3	N	0.1	µmol/L
	ABS	F	CCHEM	CLINICAL CHEMISTRY - LACTATION PERIOD	TBA	TBA	56	Day 56	2	2504	1.3	1.3		µmol/L		2	8	1.3				ABS	ABS	L	Par	P	Par	23	16	.	71	3	3	N	0.1	µmol/L
	ABS	F	CCHEM	CLINICAL CHEMISTRY - LACTATION PERIOD	TBA	TBA	56	Day 56	2	2505	1	1		µmol/L		2	9	1				ABS	ABS	L	Par	P	Par	23	16	.	71	3	3	N	0.1	µmol/L
	ABS	F	CCHEM	CLINICAL CHEMISTRY - LACTATION PERIOD	TBA	TBA	56	Day 56	3	3501	1	1		µmol/L		3	11	1				ABS	ABS	L	Par	P	Par	23	16	.	71	3	3	N	0.1	µmol/L
	ABS	F	CCHEM	CLINICAL CHEMISTRY - LACTATION PERIOD	TBA	TBA	56	Day 56	3	3503	7	7		µmol/L		3	13	7				ABS	ABS	L	Par	P	Par	23	16	.	71	3	3	N	0.1	µmol/L
	ABS	F	CCHEM	CLINICAL CHEMISTRY - LACTATION PERIOD	TBA	TBA	56	Day 56	3	3504	.	<1.0		µmol/L	<1.0	3	14	<1.0				ABS	ABS	L	Par	P	Par	23	16	.	71	3	3	N	0.1	µmol/L
	ABS	F	CCHEM	CLINICAL CHEMISTRY - LACTATION PERIOD	TBA	TBA	56	Day 56	3	3505	.	<1.0		µmol/L	<1.0	3	15	<1.0				ABS	ABS	L	Par	P	Par	23	16	.	71	3	3	N	0.1	µmol/L
	ABS	F	CCHEM	CLINICAL CHEMISTRY - LACTATION PERIOD	TBA	TBA	56	Day 56	4	4502	.	<1.0		µmol/L	<1.0	4	16	<1.0				ABS	ABS	L	Par	P	Par	23	16	.	71	3	3	N	0.1	µmol/L
	ABS	F	CCHEM	CLINICAL CHEMISTRY - LACTATION PERIOD	TBA	TBA	56	Day 56	4	4504	.	<1.0		µmol/L	<1.0	4	17	<1.0				ABS	ABS	L	Par	P	Par	23	16	.	71	3	3	N	0.1	µmol/L
	ABS	F	CCHEM	CLINICAL CHEMISTRY - LACTATION PERIOD	TBA	TBA	56	Day 56	4	4505	1.8	1.8		µmol/L		4	18	1.8				ABS	ABS	L	Par	P	Par	23	16	.	71	3	3	N	0.1	µmol/L
	ABS	F	CCHEM	CLINICAL CHEMISTRY - LACTATION PERIOD	TBA	TBA	56	Day 56	4	4506	.	<1.0		µmol/L	<1.0	4	19	<1.0				ABS	ABS	L	Par	P	Par	23	16	.	71	3	3	N	0.1	µmol/L
	ABS	F	CCHEM	CLINICAL CHEMISTRY - LACTATION PERIOD	TP	TP	56	Day 56	1	1501	62.3	62.3		g/L		1	1	62.3				ABS	ABS	L	Par	P	Par	23	16	.	42	2	2	N	0.1	g/L
	ABS	F	CCHEM	CLINICAL CHEMISTRY - LACTATION PERIOD	TP	TP	56	Day 56	1	1502	63.8	63.8		g/L		1	2	63.8				ABS	ABS	L	Par	P	Par	23	16	.	42	2	2	N	0.1	g/L
	ABS	F	CCHEM	CLINICAL CHEMISTRY - LACTATION PERIOD	TP	TP	56	Day 56	1	1503	62.8	62.8		g/L		1	3	62.8				ABS	ABS	L	Par	P	Par	23	16	.	42	2	2	N	0.1	g/L
	ABS	F	CCHEM	CLINICAL CHEMISTRY - LACTATION PERIOD	TP	TP	56	Day 56	1	1504	56.3	56.3		g/L		1	4	56.3				ABS	ABS	L	Par	P	Par	23	16	.	42	2	2	N	0.1	g/L
	ABS	F	CCHEM	CLINICAL CHEMISTRY - LACTATION PERIOD	TP	TP	56	Day 56	1	1506	61.3	61.3		g/L		1	5	61.3				ABS	ABS	L	Par	P	Par	23	16	.	42	2	2	N	0.1	g/L
	ABS	F	CCHEM	CLINICAL CHEMISTRY - LACTATION PERIOD	TP	TP	56	Day 56	2	2501	58.1	58.1		g/L		2	6	58.1				ABS	ABS	L	Par	P	Par	23	16	.	42	2	2	N	0.1	g/L
	ABS	F	CCHEM	CLINICAL CHEMISTRY - LACTATION PERIOD	TP	TP	56	Day 56	2	2503	61	61		g/L		2	7	61				ABS	ABS	L	Par	P	Par	23	16	.	42	2	2	N	0.1	g/L
	ABS	F	CCHEM	CLINICAL CHEMISTRY - LACTATION PERIOD	TP	TP	56	Day 56	2	2504	59.5	59.5		g/L		2	8	59.5				ABS	ABS	L	Par	P	Par	23	16	.	42	2	2	N	0.1	g/L
	ABS	F	CCHEM	CLINICAL CHEMISTRY - LACTATION PERIOD	TP	TP	56	Day 56	2	2505	61.5	61.5		g/L		2	9	61.5				ABS	ABS	L	Par	P	Par	23	16	.	42	2	2	N	0.1	g/L
	ABS	F	CCHEM	CLINICAL CHEMISTRY - LACTATION PERIOD	TP	TP	56	Day 56	3	3501	62	62		g/L		3	11	62				ABS	ABS	L	Par	P	Par	23	16	.	42	2	2	N	0.1	g/L
	ABS	F	CCHEM	CLINICAL CHEMISTRY - LACTATION PERIOD	TP	TP	56	Day 56	3	3503	60.7	60.7		g/L		3	13	60.7				ABS	ABS	L	Par	P	Par	23	16	.	42	2	2	N	0.1	g/L
	ABS	F	CCHEM	CLINICAL CHEMISTRY - LACTATION PERIOD	TP	TP	56	Day 56	3	3504	60	60		g/L		3	14	60				ABS	ABS	L	Par	P	Par	23	16	.	42	2	2	N	0.1	g/L
	ABS	F	CCHEM	CLINICAL CHEMISTRY - LACTATION PERIOD	TP	TP	56	Day 56	3	3505	63.6	63.6		g/L		3	15	63.6				ABS	ABS	L	Par	P	Par	23	16	.	42	2	2	N	0.1	g/L
	ABS	F	CCHEM	CLINICAL CHEMISTRY - LACTATION PERIOD	TP	TP	56	Day 56	4	4502	59.3	59.3		g/L		4	16	59.3				ABS	ABS	L	Par	P	Par	23	16	.	42	2	2	N	0.1	g/L
	ABS	F	CCHEM	CLINICAL CHEMISTRY - LACTATION PERIOD	TP	TP	56	Day 56	4	4504	58.7	58.7		g/L		4	17	58.7				ABS	ABS	L	Par	P	Par	23	16	.	42	2	2	N	0.1	g/L
	ABS	F	CCHEM	CLINICAL CHEMISTRY - LACTATION PERIOD	TP	TP	56	Day 56	4	4505	61.5	61.5		g/L		4	18	61.5				ABS	ABS	L	Par	P	Par	23	16	.	42	2	2	N	0.1	g/L
	ABS	F	CCHEM	CLINICAL CHEMISTRY - LACTATION PERIOD	TP	TP	56	Day 56	4	4506	64.5	64.5		g/L		4	19	64.5				ABS	ABS	L	Par	P	Par	23	16	.	42	2	2	N	0.1	g/L
	ABS	F	CCHEM	CLINICAL CHEMISTRY - LACTATION PERIOD	TRIG	TRIG	56	Day 56	1	1501	0.55	0.55		mmol/L		1	1	0.55				ABS	ABS	L	Par	P	Par	23	16	.	33	1	1	N	0.01	mmol/L
	ABS	F	CCHEM	CLINICAL CHEMISTRY - LACTATION PERIOD	TRIG	TRIG	56	Day 56	1	1502	0.5	0.5		mmol/L		1	2	0.5				ABS	ABS	L	Par	P	Par	23	16	.	33	1	1	N	0.01	mmol/L
	ABS	F	CCHEM	CLINICAL CHEMISTRY - LACTATION PERIOD	TRIG	TRIG	56	Day 56	1	1503	0.59	0.59		mmol/L		1	3	0.59				ABS	ABS	L	Par	P	Par	23	16	.	33	1	1	N	0.01	mmol/L
	ABS	F	CCHEM	CLINICAL CHEMISTRY - LACTATION PERIOD	TRIG	TRIG	56	Day 56	1	1504	0.42	0.42		mmol/L		1	4	0.42				ABS	ABS	L	Par	P	Par	23	16	.	33	1	1	N	0.01	mmol/L
	ABS	F	CCHEM	CLINICAL CHEMISTRY - LACTATION PERIOD	TRIG	TRIG	56	Day 56	1	1506	0.5	0.5		mmol/L		1	5	0.5				ABS	ABS	L	Par	P	Par	23	16	.	33	1	1	N	0.01	mmol/L
	ABS	F	CCHEM	CLINICAL CHEMISTRY - LACTATION PERIOD	TRIG	TRIG	56	Day 56	2	2501	0.49	0.49		mmol/L		2	6	0.49				ABS	ABS	L	Par	P	Par	23	16	.	33	1	1	N	0.01	mmol/L
	ABS	F	CCHEM	CLINICAL CHEMISTRY - LACTATION PERIOD	TRIG	TRIG	56	Day 56	2	2503	0.35	0.35		mmol/L		2	7	0.35				ABS	ABS	L	Par	P	Par	23	16	.	33	1	1	N	0.01	mmol/L
	ABS	F	CCHEM	CLINICAL CHEMISTRY - LACTATION PERIOD	TRIG	TRIG	56	Day 56	2	2504	0.35	0.35		mmol/L		2	8	0.35				ABS	ABS	L	Par	P	Par	23	16	.	33	1	1	N	0.01	mmol/L
	ABS	F	CCHEM	CLINICAL CHEMISTRY - LACTATION PERIOD	TRIG	TRIG	56	Day 56	2	2505	0.43	0.43		mmol/L		2	9	0.43				ABS	ABS	L	Par	P	Par	23	16	.	33	1	1	N	0.01	mmol/L
	ABS	F	CCHEM	CLINICAL CHEMISTRY - LACTATION PERIOD	TRIG	TRIG	56	Day 56	3	3501	0.39	0.39		mmol/L		3	11	0.39				ABS	ABS	L	Par	P	Par	23	16	.	33	1	1	N	0.01	mmol/L
	ABS	F	CCHEM	CLINICAL CHEMISTRY - LACTATION PERIOD	TRIG	TRIG	56	Day 56	3	3503	0.33	0.33		mmol/L		3	13	0.33				ABS	ABS	L	Par	P	Par	23	16	.	33	1	1	N	0.01	mmol/L
	ABS	F	CCHEM	CLINICAL CHEMISTRY - LACTATION PERIOD	TRIG	TRIG	56	Day 56	3	3504	0.4	0.4		mmol/L		3	14	0.4				ABS	ABS	L	Par	P	Par	23	16	.	33	1	1	N	0.01	mmol/L
	ABS	F	CCHEM	CLINICAL CHEMISTRY - LACTATION PERIOD	TRIG	TRIG	56	Day 56	3	3505	0.42	0.42		mmol/L		3	15	0.42				ABS	ABS	L	Par	P	Par	23	16	.	33	1	1	N	0.01	mmol/L
	ABS	F	CCHEM	CLINICAL CHEMISTRY - LACTATION PERIOD	TRIG	TRIG	56	Day 56	4	4502	0.44	0.44		mmol/L		4	16	0.44				ABS	ABS	L	Par	P	Par	23	16	.	33	1	1	N	0.01	mmol/L
	ABS	F	CCHEM	CLINICAL CHEMISTRY - LACTATION PERIOD	TRIG	TRIG	56	Day 56	4	4504	0.44	0.44		mmol/L		4	17	0.44				ABS	ABS	L	Par	P	Par	23	16	.	33	1	1	N	0.01	mmol/L
	ABS	F	CCHEM	CLINICAL CHEMISTRY - LACTATION PERIOD	TRIG	TRIG	56	Day 56	4	4505	0.29	0.29		mmol/L		4	18	0.29				ABS	ABS	L	Par	P	Par	23	16	.	33	1	1	N	0.01	mmol/L
	ABS	F	CCHEM	CLINICAL CHEMISTRY - LACTATION PERIOD	TRIG	TRIG	56	Day 56	4	4506	0.56	0.56		mmol/L		4	19	0.56				ABS	ABS	L	Par	P	Par	23	16	.	33	1	1	N	0.01	mmol/L
	ABS	F	CCHEM	CLINICAL CHEMISTRY - LACTATION PERIOD	UREA	UREA	56	Day 56	1	1501	4.3	4.3		mmol/L		1	1	4.3				ABS	ABS	L	Par	P	Par	23	16	.	37	1	1	N	0.1	mmol/L
	ABS	F	CCHEM	CLINICAL CHEMISTRY - LACTATION PERIOD	UREA	UREA	56	Day 56	1	1502	5.8	5.8		mmol/L		1	2	5.8				ABS	ABS	L	Par	P	Par	23	16	.	37	1	1	N	0.1	mmol/L
	ABS	F	CCHEM	CLINICAL CHEMISTRY - LACTATION PERIOD	UREA	UREA	56	Day 56	1	1503	6.7	6.7		mmol/L		1	3	6.7				ABS	ABS	L	Par	P	Par	23	16	.	37	1	1	N	0.1	mmol/L
	ABS	F	CCHEM	CLINICAL CHEMISTRY - LACTATION PERIOD	UREA	UREA	56	Day 56	1	1504	5.9	5.9		mmol/L		1	4	5.9				ABS	ABS	L	Par	P	Par	23	16	.	37	1	1	N	0.1	mmol/L
	ABS	F	CCHEM	CLINICAL CHEMISTRY - LACTATION PERIOD	UREA	UREA	56	Day 56	1	1506	5	5		mmol/L		1	5	5				ABS	ABS	L	Par	P	Par	23	16	.	37	1	1	N	0.1	mmol/L
	ABS	F	CCHEM	CLINICAL CHEMISTRY - LACTATION PERIOD	UREA	UREA	56	Day 56	2	2501	4.7	4.7		mmol/L		2	6	4.7				ABS	ABS	L	Par	P	Par	23	16	.	37	1	1	N	0.1	mmol/L
	ABS	F	CCHEM	CLINICAL CHEMISTRY - LACTATION PERIOD	UREA	UREA	56	Day 56	2	2503	6.3	6.3		mmol/L		2	7	6.3				ABS	ABS	L	Par	P	Par	23	16	.	37	1	1	N	0.1	mmol/L
	ABS	F	CCHEM	CLINICAL CHEMISTRY - LACTATION PERIOD	UREA	UREA	56	Day 56	2	2504	6.9	6.9		mmol/L		2	8	6.9				ABS	ABS	L	Par	P	Par	23	16	.	37	1	1	N	0.1	mmol/L
	ABS	F	CCHEM	CLINICAL CHEMISTRY - LACTATION PERIOD	UREA	UREA	56	Day 56	2	2505	3.9	3.9		mmol/L		2	9	3.9				ABS	ABS	L	Par	P	Par	23	16	.	37	1	1	N	0.1	mmol/L
	ABS	F	CCHEM	CLINICAL CHEMISTRY - LACTATION PERIOD	UREA	UREA	56	Day 56	3	3501	4.5	4.5		mmol/L		3	11	4.5				ABS	ABS	L	Par	P	Par	23	16	.	37	1	1	N	0.1	mmol/L
	ABS	F	CCHEM	CLINICAL CHEMISTRY - LACTATION PERIOD	UREA	UREA	56	Day 56	3	3503	8.9	8.9		mmol/L		3	13	8.9				ABS	ABS	L	Par	P	Par	23	16	.	37	1	1	N	0.1	mmol/L
	ABS	F	CCHEM	CLINICAL CHEMISTRY - LACTATION PERIOD	UREA	UREA	56	Day 56	3	3504	4.9	4.9		mmol/L		3	14	4.9				ABS	ABS	L	Par	P	Par	23	16	.	37	1	1	N	0.1	mmol/L
	ABS	F	CCHEM	CLINICAL CHEMISTRY - LACTATION PERIOD	UREA	UREA	56	Day 56	3	3505	6.7	6.7		mmol/L		3	15	6.7				ABS	ABS	L	Par	P	Par	23	16	.	37	1	1	N	0.1	mmol/L
	ABS	F	CCHEM	CLINICAL CHEMISTRY - LACTATION PERIOD	UREA	UREA	56	Day 56	4	4502	6.3	6.3		mmol/L		4	16	6.3				ABS	ABS	L	Par	P	Par	23	16	.	37	1	1	N	0.1	mmol/L
	ABS	F	CCHEM	CLINICAL CHEMISTRY - LACTATION PERIOD	UREA	UREA	56	Day 56	4	4504	6	6		mmol/L		4	17	6				ABS	ABS	L	Par	P	Par	23	16	.	37	1	1	N	0.1	mmol/L
	ABS	F	CCHEM	CLINICAL CHEMISTRY - LACTATION PERIOD	UREA	UREA	56	Day 56	4	4505	6.4	6.4		mmol/L		4	18	6.4				ABS	ABS	L	Par	P	Par	23	16	.	37	1	1	N	0.1	mmol/L
	ABS	F	CCHEM	CLINICAL CHEMISTRY - LACTATION PERIOD	UREA	UREA	56	Day 56	4	4506	4	4		mmol/L		4	19	4				ABS	ABS	L	Par	P	Par	23	16	.	37	1	1	N	0.1	mmol/L
	ABS	F	HEMA	HEMATOLOGY - LACTATION PERIOD	%BASO	BASO	56	Day 56	1	1501	0.3	0.3		%		1	1	0.3				ABS	ABS	L	Par	P	Par	21	16	.	252	3	3	N	0.1	%
	ABS	F	HEMA	HEMATOLOGY - LACTATION PERIOD	%BASO	BASO	56	Day 56	1	1502	0.3	0.3		%		1	2	0.3				ABS	ABS	L	Par	P	Par	21	16	.	252	3	3	N	0.1	%
	ABS	F	HEMA	HEMATOLOGY - LACTATION PERIOD	%BASO	BASO	56	Day 56	1	1503	0.4	0.4		%		1	3	0.4				ABS	ABS	L	Par	P	Par	21	16	.	252	3	3	N	0.1	%
	ABS	F	HEMA	HEMATOLOGY - LACTATION PERIOD	%BASO	BASO	56	Day 56	1	1504	0.4	0.4		%		1	4	0.4				ABS	ABS	L	Par	P	Par	21	16	.	252	3	3	N	0.1	%
	ABS	F	HEMA	HEMATOLOGY - LACTATION PERIOD	%BASO	BASO	56	Day 56	1	1506	0.7	0.7		%		1	5	0.7				ABS	ABS	L	Par	P	Par	21	16	.	252	3	3	N	0.1	%
	ABS	F	HEMA	HEMATOLOGY - LACTATION PERIOD	%BASO	BASO	56	Day 56	2	2501	0.5	0.5		%		2	6	0.5				ABS	ABS	L	Par	P	Par	21	16	.	252	3	3	N	0.1	%
	ABS	F	HEMA	HEMATOLOGY - LACTATION PERIOD	%BASO	BASO	56	Day 56	2	2503	0.3	0.3		%		2	7	0.3				ABS	ABS	L	Par	P	Par	21	16	.	252	3	3	N	0.1	%
	ABS	F	HEMA	HEMATOLOGY - LACTATION PERIOD	%BASO	BASO	56	Day 56	2	2504	0.6	0.6		%		2	8	0.6				ABS	ABS	L	Par	P	Par	21	16	.	252	3	3	N	0.1	%
	ABS	F	HEMA	HEMATOLOGY - LACTATION PERIOD	%BASO	BASO	56	Day 56	2	2505	0.5	0.5		%		2	9	0.5				ABS	ABS	L	Par	P	Par	21	16	.	252	3	3	N	0.1	%
	ABS	F	HEMA	HEMATOLOGY - LACTATION PERIOD	%BASO	BASO	56	Day 56	3	3501	0.4	0.4		%		3	11	0.4				ABS	ABS	L	Par	P	Par	21	16	.	252	3	3	N	0.1	%
	ABS	F	HEMA	HEMATOLOGY - LACTATION PERIOD	%BASO	BASO	56	Day 56	3	3503	0.3	0.3		%		3	13	0.3				ABS	ABS	L	Par	P	Par	21	16	.	252	3	3	N	0.1	%
	ABS	F	HEMA	HEMATOLOGY - LACTATION PERIOD	%BASO	BASO	56	Day 56	3	3504	0.4	0.4		%		3	14	0.4				ABS	ABS	L	Par	P	Par	21	16	.	252	3	3	N	0.1	%
	ABS	F	HEMA	HEMATOLOGY - LACTATION PERIOD	%BASO	BASO	56	Day 56	3	3505	0.3	0.3		%		3	15	0.3				ABS	ABS	L	Par	P	Par	21	16	.	252	3	3	N	0.1	%
	ABS	F	HEMA	HEMATOLOGY - LACTATION PERIOD	%BASO	BASO	56	Day 56	4	4502	0.4	0.4		%		4	16	0.4				ABS	ABS	L	Par	P	Par	21	16	.	252	3	3	N	0.1	%
	ABS	F	HEMA	HEMATOLOGY - LACTATION PERIOD	%BASO	BASO	56	Day 56	4	4504	0.3	0.3		%		4	17	0.3				ABS	ABS	L	Par	P	Par	21	16	.	252	3	3	N	0.1	%
	ABS	F	HEMA	HEMATOLOGY - LACTATION PERIOD	%BASO	BASO	56	Day 56	4	4505	0.2	0.2		%		4	18	0.2				ABS	ABS	L	Par	P	Par	21	16	.	252	3	3	N	0.1	%
	ABS	F	HEMA	HEMATOLOGY - LACTATION PERIOD	%BASO	BASO	56	Day 56	4	4506	0.4	0.4		%		4	19	0.4				ABS	ABS	L	Par	P	Par	21	16	.	252	3	3	N	0.1	%
	ABS	F	HEMA	HEMATOLOGY - LACTATION PERIOD	%EOS	EOS	56	Day 56	1	1501	6.7	6.7		%		1	1	6.7				ABS	ABS	L	Par	P	Par	21	16	.	251	3	3	N	0.1	%
	ABS	F	HEMA	HEMATOLOGY - LACTATION PERIOD	%EOS	EOS	56	Day 56	1	1502	5.3	5.3		%		1	2	5.3				ABS	ABS	L	Par	P	Par	21	16	.	251	3	3	N	0.1	%
	ABS	F	HEMA	HEMATOLOGY - LACTATION PERIOD	%EOS	EOS	56	Day 56	1	1503	20.8	20.8		%		1	3	20.8				ABS	ABS	L	Par	P	Par	21	16	.	251	3	3	N	0.1	%
	ABS	F	HEMA	HEMATOLOGY - LACTATION PERIOD	%EOS	EOS	56	Day 56	1	1504	10.3	10.3		%		1	4	10.3				ABS	ABS	L	Par	P	Par	21	16	.	251	3	3	N	0.1	%
	ABS	F	HEMA	HEMATOLOGY - LACTATION PERIOD	%EOS	EOS	56	Day 56	1	1506	5.6	5.6		%		1	5	5.6				ABS	ABS	L	Par	P	Par	21	16	.	251	3	3	N	0.1	%
	ABS	F	HEMA	HEMATOLOGY - LACTATION PERIOD	%EOS	EOS	56	Day 56	2	2501	10.5	10.5		%		2	6	10.5				ABS	ABS	L	Par	P	Par	21	16	.	251	3	3	N	0.1	%
	ABS	F	HEMA	HEMATOLOGY - LACTATION PERIOD	%EOS	EOS	56	Day 56	2	2503	4	4		%		2	7	4				ABS	ABS	L	Par	P	Par	21	16	.	251	3	3	N	0.1	%
	ABS	F	HEMA	HEMATOLOGY - LACTATION PERIOD	%EOS	EOS	56	Day 56	2	2504	4.2	4.2		%		2	8	4.2				ABS	ABS	L	Par	P	Par	21	16	.	251	3	3	N	0.1	%
	ABS	F	HEMA	HEMATOLOGY - LACTATION PERIOD	%EOS	EOS	56	Day 56	2	2505	5	5		%		2	9	5				ABS	ABS	L	Par	P	Par	21	16	.	251	3	3	N	0.1	%
	ABS	F	HEMA	HEMATOLOGY - LACTATION PERIOD	%EOS	EOS	56	Day 56	3	3501	9.6	9.6		%		3	11	9.6				ABS	ABS	L	Par	P	Par	21	16	.	251	3	3	N	0.1	%
	ABS	F	HEMA	HEMATOLOGY - LACTATION PERIOD	%EOS	EOS	56	Day 56	3	3503	14	14		%		3	13	14				ABS	ABS	L	Par	P	Par	21	16	.	251	3	3	N	0.1	%
	ABS	F	HEMA	HEMATOLOGY - LACTATION PERIOD	%EOS	EOS	56	Day 56	3	3504	6.3	6.3		%		3	14	6.3				ABS	ABS	L	Par	P	Par	21	16	.	251	3	3	N	0.1	%
	ABS	F	HEMA	HEMATOLOGY - LACTATION PERIOD	%EOS	EOS	56	Day 56	3	3505	2.8	2.8		%		3	15	2.8				ABS	ABS	L	Par	P	Par	21	16	.	251	3	3	N	0.1	%
	ABS	F	HEMA	HEMATOLOGY - LACTATION PERIOD	%EOS	EOS	56	Day 56	4	4502	4.8	4.8		%		4	16	4.8				ABS	ABS	L	Par	P	Par	21	16	.	251	3	3	N	0.1	%
	ABS	F	HEMA	HEMATOLOGY - LACTATION PERIOD	%EOS	EOS	56	Day 56	4	4504	4.7	4.7		%		4	17	4.7				ABS	ABS	L	Par	P	Par	21	16	.	251	3	3	N	0.1	%
	ABS	F	HEMA	HEMATOLOGY - LACTATION PERIOD	%EOS	EOS	56	Day 56	4	4505	6	6		%		4	18	6				ABS	ABS	L	Par	P	Par	21	16	.	251	3	3	N	0.1	%
	ABS	F	HEMA	HEMATOLOGY - LACTATION PERIOD	%EOS	EOS	56	Day 56	4	4506	3.4	3.4		%		4	19	3.4				ABS	ABS	L	Par	P	Par	21	16	.	251	3	3	N	0.1	%
	ABS	F	HEMA	HEMATOLOGY - LACTATION PERIOD	%LUC	LUC	56	Day 56	1	1501	0.3	0.3		%		1	1	0.3				ABS	ABS	L	Par	P	Par	21	16	.	253	3	3	N	0.1	%
	ABS	F	HEMA	HEMATOLOGY - LACTATION PERIOD	%LUC	LUC	56	Day 56	1	1502	0.5	0.5		%		1	2	0.5				ABS	ABS	L	Par	P	Par	21	16	.	253	3	3	N	0.1	%
	ABS	F	HEMA	HEMATOLOGY - LACTATION PERIOD	%LUC	LUC	56	Day 56	1	1503	0.3	0.3		%		1	3	0.3				ABS	ABS	L	Par	P	Par	21	16	.	253	3	3	N	0.1	%
	ABS	F	HEMA	HEMATOLOGY - LACTATION PERIOD	%LUC	LUC	56	Day 56	1	1504	0.3	0.3		%		1	4	0.3				ABS	ABS	L	Par	P	Par	21	16	.	253	3	3	N	0.1	%
	ABS	F	HEMA	HEMATOLOGY - LACTATION PERIOD	%LUC	LUC	56	Day 56	1	1506	0.8	0.8		%		1	5	0.8				ABS	ABS	L	Par	P	Par	21	16	.	253	3	3	N	0.1	%
	ABS	F	HEMA	HEMATOLOGY - LACTATION PERIOD	%LUC	LUC	56	Day 56	2	2501	0.2	0.2		%		2	6	0.2				ABS	ABS	L	Par	P	Par	21	16	.	253	3	3	N	0.1	%
	ABS	F	HEMA	HEMATOLOGY - LACTATION PERIOD	%LUC	LUC	56	Day 56	2	2503	0.3	0.3		%		2	7	0.3				ABS	ABS	L	Par	P	Par	21	16	.	253	3	3	N	0.1	%
	ABS	F	HEMA	HEMATOLOGY - LACTATION PERIOD	%LUC	LUC	56	Day 56	2	2504	0.3	0.3		%		2	8	0.3				ABS	ABS	L	Par	P	Par	21	16	.	253	3	3	N	0.1	%
	ABS	F	HEMA	HEMATOLOGY - LACTATION PERIOD	%LUC	LUC	56	Day 56	2	2505	0.3	0.3		%		2	9	0.3				ABS	ABS	L	Par	P	Par	21	16	.	253	3	3	N	0.1	%
	ABS	F	HEMA	HEMATOLOGY - LACTATION PERIOD	%LUC	LUC	56	Day 56	3	3501	0.4	0.4		%		3	11	0.4				ABS	ABS	L	Par	P	Par	21	16	.	253	3	3	N	0.1	%
	ABS	F	HEMA	HEMATOLOGY - LACTATION PERIOD	%LUC	LUC	56	Day 56	3	3503	0.3	0.3		%		3	13	0.3				ABS	ABS	L	Par	P	Par	21	16	.	253	3	3	N	0.1	%
	ABS	F	HEMA	HEMATOLOGY - LACTATION PERIOD	%LUC	LUC	56	Day 56	3	3504	0.3	0.3		%		3	14	0.3				ABS	ABS	L	Par	P	Par	21	16	.	253	3	3	N	0.1	%
	ABS	F	HEMA	HEMATOLOGY - LACTATION PERIOD	%LUC	LUC	56	Day 56	3	3505	0.4	0.4		%		3	15	0.4				ABS	ABS	L	Par	P	Par	21	16	.	253	3	3	N	0.1	%
	ABS	F	HEMA	HEMATOLOGY - LACTATION PERIOD	%LUC	LUC	56	Day 56	4	4502	0.3	0.3		%		4	16	0.3				ABS	ABS	L	Par	P	Par	21	16	.	253	3	3	N	0.1	%
	ABS	F	HEMA	HEMATOLOGY - LACTATION PERIOD	%LUC	LUC	56	Day 56	4	4504	0.2	0.2		%		4	17	0.2				ABS	ABS	L	Par	P	Par	21	16	.	253	3	3	N	0.1	%
	ABS	F	HEMA	HEMATOLOGY - LACTATION PERIOD	%LUC	LUC	56	Day 56	4	4505	0.3	0.3		%		4	18	0.3				ABS	ABS	L	Par	P	Par	21	16	.	253	3	3	N	0.1	%
	ABS	F	HEMA	HEMATOLOGY - LACTATION PERIOD	%LUC	LUC	56	Day 56	4	4506	0.3	0.3		%		4	19	0.3				ABS	ABS	L	Par	P	Par	21	16	.	253	3	3	N	0.1	%
	ABS	F	HEMA	HEMATOLOGY - LACTATION PERIOD	%LYMPH	LYMPH	56	Day 56	1	1501	24.5	24.5		%		1	1	24.5				ABS	ABS	L	Par	P	Par	21	16	.	249	3	3	N	0.1	%
	ABS	F	HEMA	HEMATOLOGY - LACTATION PERIOD	%LYMPH	LYMPH	56	Day 56	1	1502	33.9	33.9		%		1	2	33.9				ABS	ABS	L	Par	P	Par	21	16	.	249	3	3	N	0.1	%
	ABS	F	HEMA	HEMATOLOGY - LACTATION PERIOD	%LYMPH	LYMPH	56	Day 56	1	1503	29	29		%		1	3	29				ABS	ABS	L	Par	P	Par	21	16	.	249	3	3	N	0.1	%
	ABS	F	HEMA	HEMATOLOGY - LACTATION PERIOD	%LYMPH	LYMPH	56	Day 56	1	1504	29.8	29.8		%		1	4	29.8				ABS	ABS	L	Par	P	Par	21	16	.	249	3	3	N	0.1	%
	ABS	F	HEMA	HEMATOLOGY - LACTATION PERIOD	%LYMPH	LYMPH	56	Day 56	1	1506	33.3	33.3		%		1	5	33.3				ABS	ABS	L	Par	P	Par	21	16	.	249	3	3	N	0.1	%
	ABS	F	HEMA	HEMATOLOGY - LACTATION PERIOD	%LYMPH	LYMPH	56	Day 56	2	2501	23.6	23.6		%		2	6	23.6				ABS	ABS	L	Par	P	Par	21	16	.	249	3	3	N	0.1	%
	ABS	F	HEMA	HEMATOLOGY - LACTATION PERIOD	%LYMPH	LYMPH	56	Day 56	2	2503	17.3	17.3		%		2	7	17.3				ABS	ABS	L	Par	P	Par	21	16	.	249	3	3	N	0.1	%
	ABS	F	HEMA	HEMATOLOGY - LACTATION PERIOD	%LYMPH	LYMPH	56	Day 56	2	2504	33.9	33.9		%		2	8	33.9				ABS	ABS	L	Par	P	Par	21	16	.	249	3	3	N	0.1	%
	ABS	F	HEMA	HEMATOLOGY - LACTATION PERIOD	%LYMPH	LYMPH	56	Day 56	2	2505	21.3	21.3		%		2	9	21.3				ABS	ABS	L	Par	P	Par	21	16	.	249	3	3	N	0.1	%
	ABS	F	HEMA	HEMATOLOGY - LACTATION PERIOD	%LYMPH	LYMPH	56	Day 56	3	3501	18.6	18.6		%		3	11	18.6				ABS	ABS	L	Par	P	Par	21	16	.	249	3	3	N	0.1	%
	ABS	F	HEMA	HEMATOLOGY - LACTATION PERIOD	%LYMPH	LYMPH	56	Day 56	3	3503	19.4	19.4		%		3	13	19.4				ABS	ABS	L	Par	P	Par	21	16	.	249	3	3	N	0.1	%
	ABS	F	HEMA	HEMATOLOGY - LACTATION PERIOD	%LYMPH	LYMPH	56	Day 56	3	3504	18.4	18.4		%		3	14	18.4				ABS	ABS	L	Par	P	Par	21	16	.	249	3	3	N	0.1	%
	ABS	F	HEMA	HEMATOLOGY - LACTATION PERIOD	%LYMPH	LYMPH	56	Day 56	3	3505	26.7	26.7		%		3	15	26.7				ABS	ABS	L	Par	P	Par	21	16	.	249	3	3	N	0.1	%
	ABS	F	HEMA	HEMATOLOGY - LACTATION PERIOD	%LYMPH	LYMPH	56	Day 56	4	4502	38.2	38.2		%		4	16	38.2				ABS	ABS	L	Par	P	Par	21	16	.	249	3	3	N	0.1	%
	ABS	F	HEMA	HEMATOLOGY - LACTATION PERIOD	%LYMPH	LYMPH	56	Day 56	4	4504	22.5	22.5		%		4	17	22.5				ABS	ABS	L	Par	P	Par	21	16	.	249	3	3	N	0.1	%
	ABS	F	HEMA	HEMATOLOGY - LACTATION PERIOD	%LYMPH	LYMPH	56	Day 56	4	4505	22.8	22.8		%		4	18	22.8				ABS	ABS	L	Par	P	Par	21	16	.	249	3	3	N	0.1	%
	ABS	F	HEMA	HEMATOLOGY - LACTATION PERIOD	%LYMPH	LYMPH	56	Day 56	4	4506	29.2	29.2		%		4	19	29.2				ABS	ABS	L	Par	P	Par	21	16	.	249	3	3	N	0.1	%
	ABS	F	HEMA	HEMATOLOGY - LACTATION PERIOD	%MONO	MONO	56	Day 56	1	1501	7.5	7.5		%		1	1	7.5				ABS	ABS	L	Par	P	Par	21	16	.	250	3	3	N	0.1	%
	ABS	F	HEMA	HEMATOLOGY - LACTATION PERIOD	%MONO	MONO	56	Day 56	1	1502	5	5		%		1	2	5				ABS	ABS	L	Par	P	Par	21	16	.	250	3	3	N	0.1	%
	ABS	F	HEMA	HEMATOLOGY - LACTATION PERIOD	%MONO	MONO	56	Day 56	1	1503	6.4	6.4		%		1	3	6.4				ABS	ABS	L	Par	P	Par	21	16	.	250	3	3	N	0.1	%
	ABS	F	HEMA	HEMATOLOGY - LACTATION PERIOD	%MONO	MONO	56	Day 56	1	1504	4.6	4.6		%		1	4	4.6				ABS	ABS	L	Par	P	Par	21	16	.	250	3	3	N	0.1	%
	ABS	F	HEMA	HEMATOLOGY - LACTATION PERIOD	%MONO	MONO	56	Day 56	1	1506	3.9	3.9		%		1	5	3.9				ABS	ABS	L	Par	P	Par	21	16	.	250	3	3	N	0.1	%
	ABS	F	HEMA	HEMATOLOGY - LACTATION PERIOD	%MONO	MONO	56	Day 56	2	2501	3.8	3.8		%		2	6	3.8				ABS	ABS	L	Par	P	Par	21	16	.	250	3	3	N	0.1	%
	ABS	F	HEMA	HEMATOLOGY - LACTATION PERIOD	%MONO	MONO	56	Day 56	2	2503	3.5	3.5		%		2	7	3.5				ABS	ABS	L	Par	P	Par	21	16	.	250	3	3	N	0.1	%
	ABS	F	HEMA	HEMATOLOGY - LACTATION PERIOD	%MONO	MONO	56	Day 56	2	2504	3.9	3.9		%		2	8	3.9				ABS	ABS	L	Par	P	Par	21	16	.	250	3	3	N	0.1	%
	ABS	F	HEMA	HEMATOLOGY - LACTATION PERIOD	%MONO	MONO	56	Day 56	2	2505	4.7	4.7		%		2	9	4.7				ABS	ABS	L	Par	P	Par	21	16	.	250	3	3	N	0.1	%
	ABS	F	HEMA	HEMATOLOGY - LACTATION PERIOD	%MONO	MONO	56	Day 56	3	3501	7.2	7.2		%		3	11	7.2				ABS	ABS	L	Par	P	Par	21	16	.	250	3	3	N	0.1	%
	ABS	F	HEMA	HEMATOLOGY - LACTATION PERIOD	%MONO	MONO	56	Day 56	3	3503	5.4	5.4		%		3	13	5.4				ABS	ABS	L	Par	P	Par	21	16	.	250	3	3	N	0.1	%
	ABS	F	HEMA	HEMATOLOGY - LACTATION PERIOD	%MONO	MONO	56	Day 56	3	3504	5.4	5.4		%		3	14	5.4				ABS	ABS	L	Par	P	Par	21	16	.	250	3	3	N	0.1	%
	ABS	F	HEMA	HEMATOLOGY - LACTATION PERIOD	%MONO	MONO	56	Day 56	3	3505	3.5	3.5		%		3	15	3.5				ABS	ABS	L	Par	P	Par	21	16	.	250	3	3	N	0.1	%
	ABS	F	HEMA	HEMATOLOGY - LACTATION PERIOD	%MONO	MONO	56	Day 56	4	4502	6.2	6.2		%		4	16	6.2				ABS	ABS	L	Par	P	Par	21	16	.	250	3	3	N	0.1	%
	ABS	F	HEMA	HEMATOLOGY - LACTATION PERIOD	%MONO	MONO	56	Day 56	4	4504	4.1	4.1		%		4	17	4.1				ABS	ABS	L	Par	P	Par	21	16	.	250	3	3	N	0.1	%
	ABS	F	HEMA	HEMATOLOGY - LACTATION PERIOD	%MONO	MONO	56	Day 56	4	4505	4.7	4.7		%		4	18	4.7				ABS	ABS	L	Par	P	Par	21	16	.	250	3	3	N	0.1	%
	ABS	F	HEMA	HEMATOLOGY - LACTATION PERIOD	%MONO	MONO	56	Day 56	4	4506	6.6	6.6		%		4	19	6.6				ABS	ABS	L	Par	P	Par	21	16	.	250	3	3	N	0.1	%
	ABS	F	HEMA	HEMATOLOGY - LACTATION PERIOD	%NEUT	NEUT	56	Day 56	1	1501	60.8	60.8		%		1	1	60.8				ABS	ABS	L	Par	P	Par	21	16	.	248	3	3	N	0.1	%
	ABS	F	HEMA	HEMATOLOGY - LACTATION PERIOD	%NEUT	NEUT	56	Day 56	1	1502	55	55		%		1	2	55				ABS	ABS	L	Par	P	Par	21	16	.	248	3	3	N	0.1	%
	ABS	F	HEMA	HEMATOLOGY - LACTATION PERIOD	%NEUT	NEUT	56	Day 56	1	1503	43	43		%		1	3	43				ABS	ABS	L	Par	P	Par	21	16	.	248	3	3	N	0.1	%
	ABS	F	HEMA	HEMATOLOGY - LACTATION PERIOD	%NEUT	NEUT	56	Day 56	1	1504	54.5	54.5		%		1	4	54.5				ABS	ABS	L	Par	P	Par	21	16	.	248	3	3	N	0.1	%
	ABS	F	HEMA	HEMATOLOGY - LACTATION PERIOD	%NEUT	NEUT	56	Day 56	1	1506	55.6	55.6		%		1	5	55.6				ABS	ABS	L	Par	P	Par	21	16	.	248	3	3	N	0.1	%
	ABS	F	HEMA	HEMATOLOGY - LACTATION PERIOD	%NEUT	NEUT	56	Day 56	2	2501	61.3	61.3		%		2	6	61.3				ABS	ABS	L	Par	P	Par	21	16	.	248	3	3	N	0.1	%
	ABS	F	HEMA	HEMATOLOGY - LACTATION PERIOD	%NEUT	NEUT	56	Day 56	2	2503	74.5	74.5		%		2	7	74.5				ABS	ABS	L	Par	P	Par	21	16	.	248	3	3	N	0.1	%
	ABS	F	HEMA	HEMATOLOGY - LACTATION PERIOD	%NEUT	NEUT	56	Day 56	2	2504	57.1	57.1		%		2	8	57.1				ABS	ABS	L	Par	P	Par	21	16	.	248	3	3	N	0.1	%
	ABS	F	HEMA	HEMATOLOGY - LACTATION PERIOD	%NEUT	NEUT	56	Day 56	2	2505	68.2	68.2		%		2	9	68.2				ABS	ABS	L	Par	P	Par	21	16	.	248	3	3	N	0.1	%
	ABS	F	HEMA	HEMATOLOGY - LACTATION PERIOD	%NEUT	NEUT	56	Day 56	3	3501	63.9	63.9		%		3	11	63.9				ABS	ABS	L	Par	P	Par	21	16	.	248	3	3	N	0.1	%
	ABS	F	HEMA	HEMATOLOGY - LACTATION PERIOD	%NEUT	NEUT	56	Day 56	3	3503	60.5	60.5		%		3	13	60.5				ABS	ABS	L	Par	P	Par	21	16	.	248	3	3	N	0.1	%
	ABS	F	HEMA	HEMATOLOGY - LACTATION PERIOD	%NEUT	NEUT	56	Day 56	3	3504	69.2	69.2		%		3	14	69.2				ABS	ABS	L	Par	P	Par	21	16	.	248	3	3	N	0.1	%
	ABS	F	HEMA	HEMATOLOGY - LACTATION PERIOD	%NEUT	NEUT	56	Day 56	3	3505	66.3	66.3		%		3	15	66.3				ABS	ABS	L	Par	P	Par	21	16	.	248	3	3	N	0.1	%
	ABS	F	HEMA	HEMATOLOGY - LACTATION PERIOD	%NEUT	NEUT	56	Day 56	4	4502	50.1	50.1		%		4	16	50.1				ABS	ABS	L	Par	P	Par	21	16	.	248	3	3	N	0.1	%
	ABS	F	HEMA	HEMATOLOGY - LACTATION PERIOD	%NEUT	NEUT	56	Day 56	4	4504	68.4	68.4		%		4	17	68.4				ABS	ABS	L	Par	P	Par	21	16	.	248	3	3	N	0.1	%
	ABS	F	HEMA	HEMATOLOGY - LACTATION PERIOD	%NEUT	NEUT	56	Day 56	4	4505	65.9	65.9		%		4	18	65.9				ABS	ABS	L	Par	P	Par	21	16	.	248	3	3	N	0.1	%
	ABS	F	HEMA	HEMATOLOGY - LACTATION PERIOD	%NEUT	NEUT	56	Day 56	4	4506	60.2	60.2		%		4	19	60.2				ABS	ABS	L	Par	P	Par	21	16	.	248	3	3	N	0.1	%
	ABS	F	HEMA	HEMATOLOGY - LACTATION PERIOD	%RETIC	RETIC	56	Day 56	1	1501	0.3	0.3		%		1	1	0.3				ABS	ABS	L	Par	P	Par	21	16	.	255	3	3	N	0.1	%
	ABS	F	HEMA	HEMATOLOGY - LACTATION PERIOD	%RETIC	RETIC	56	Day 56	1	1502	0.5	0.5		%		1	2	0.5				ABS	ABS	L	Par	P	Par	21	16	.	255	3	3	N	0.1	%
	ABS	F	HEMA	HEMATOLOGY - LACTATION PERIOD	%RETIC	RETIC	56	Day 56	1	1503	0.5	0.5		%		1	3	0.5				ABS	ABS	L	Par	P	Par	21	16	.	255	3	3	N	0.1	%
	ABS	F	HEMA	HEMATOLOGY - LACTATION PERIOD	%RETIC	RETIC	56	Day 56	1	1504	0.5	0.5		%		1	4	0.5				ABS	ABS	L	Par	P	Par	21	16	.	255	3	3	N	0.1	%
	ABS	F	HEMA	HEMATOLOGY - LACTATION PERIOD	%RETIC	RETIC	56	Day 56	1	1506	0.3	0.3		%		1	5	0.3				ABS	ABS	L	Par	P	Par	21	16	.	255	3	3	N	0.1	%
	ABS	F	HEMA	HEMATOLOGY - LACTATION PERIOD	%RETIC	RETIC	56	Day 56	2	2501	0.2	0.2		%		2	6	0.2				ABS	ABS	L	Par	P	Par	21	16	.	255	3	3	N	0.1	%
	ABS	F	HEMA	HEMATOLOGY - LACTATION PERIOD	%RETIC	RETIC	56	Day 56	2	2503	0.2	0.2		%		2	7	0.2				ABS	ABS	L	Par	P	Par	21	16	.	255	3	3	N	0.1	%
	ABS	F	HEMA	HEMATOLOGY - LACTATION PERIOD	%RETIC	RETIC	56	Day 56	2	2504	0.5	0.5		%		2	8	0.5				ABS	ABS	L	Par	P	Par	21	16	.	255	3	3	N	0.1	%
	ABS	F	HEMA	HEMATOLOGY - LACTATION PERIOD	%RETIC	RETIC	56	Day 56	2	2505	0.6	0.6		%		2	9	0.6				ABS	ABS	L	Par	P	Par	21	16	.	255	3	3	N	0.1	%
	ABS	F	HEMA	HEMATOLOGY - LACTATION PERIOD	%RETIC	RETIC	56	Day 56	3	3501	0.5	0.5		%		3	11	0.5				ABS	ABS	L	Par	P	Par	21	16	.	255	3	3	N	0.1	%
	ABS	F	HEMA	HEMATOLOGY - LACTATION PERIOD	%RETIC	RETIC	56	Day 56	3	3503	0.5	0.5		%		3	13	0.5				ABS	ABS	L	Par	P	Par	21	16	.	255	3	3	N	0.1	%
	ABS	F	HEMA	HEMATOLOGY - LACTATION PERIOD	%RETIC	RETIC	56	Day 56	3	3504	0.5	0.5		%		3	14	0.5				ABS	ABS	L	Par	P	Par	21	16	.	255	3	3	N	0.1	%
	ABS	F	HEMA	HEMATOLOGY - LACTATION PERIOD	%RETIC	RETIC	56	Day 56	3	3505	0.4	0.4		%		3	15	0.4				ABS	ABS	L	Par	P	Par	21	16	.	255	3	3	N	0.1	%
	ABS	F	HEMA	HEMATOLOGY - LACTATION PERIOD	%RETIC	RETIC	56	Day 56	4	4502	0.3	0.3		%		4	16	0.3				ABS	ABS	L	Par	P	Par	21	16	.	255	3	3	N	0.1	%
	ABS	F	HEMA	HEMATOLOGY - LACTATION PERIOD	%RETIC	RETIC	56	Day 56	4	4504	0.3	0.3		%		4	17	0.3				ABS	ABS	L	Par	P	Par	21	16	.	255	3	3	N	0.1	%
	ABS	F	HEMA	HEMATOLOGY - LACTATION PERIOD	%RETIC	RETIC	56	Day 56	4	4505	0.2	0.2		%		4	18	0.2				ABS	ABS	L	Par	P	Par	21	16	.	255	3	3	N	0.1	%
	ABS	F	HEMA	HEMATOLOGY - LACTATION PERIOD	%RETIC	RETIC	56	Day 56	4	4506	0.7	0.7		%		4	19	0.7				ABS	ABS	L	Par	P	Par	21	16	.	255	3	3	N	0.1	%
	ABS	F	HEMA	HEMATOLOGY - LACTATION PERIOD	BASO	BASO	56	Day 56	1	1501	0.02	0.02		x10^9/L		1	1	0.02				ABS	ABS	L	Par	P	Par	21	16	.	246	2	2	N	0.01	x10^9/L
	ABS	F	HEMA	HEMATOLOGY - LACTATION PERIOD	BASO	BASO	56	Day 56	1	1502	0.03	0.03		x10^9/L		1	2	0.03				ABS	ABS	L	Par	P	Par	21	16	.	246	2	2	N	0.01	x10^9/L
	ABS	F	HEMA	HEMATOLOGY - LACTATION PERIOD	BASO	BASO	56	Day 56	1	1503	0.03	0.03		x10^9/L		1	3	0.03				ABS	ABS	L	Par	P	Par	21	16	.	246	2	2	N	0.01	x10^9/L
	ABS	F	HEMA	HEMATOLOGY - LACTATION PERIOD	BASO	BASO	56	Day 56	1	1504	0.04	0.04		x10^9/L		1	4	0.04				ABS	ABS	L	Par	P	Par	21	16	.	246	2	2	N	0.01	x10^9/L
	ABS	F	HEMA	HEMATOLOGY - LACTATION PERIOD	BASO	BASO	56	Day 56	1	1506	0.05	0.05		x10^9/L		1	5	0.05				ABS	ABS	L	Par	P	Par	21	16	.	246	2	2	N	0.01	x10^9/L
	ABS	F	HEMA	HEMATOLOGY - LACTATION PERIOD	BASO	BASO	56	Day 56	2	2501	0.04	0.04		x10^9/L		2	6	0.04				ABS	ABS	L	Par	P	Par	21	16	.	246	2	2	N	0.01	x10^9/L
	ABS	F	HEMA	HEMATOLOGY - LACTATION PERIOD	BASO	BASO	56	Day 56	2	2503	0.02	0.02		x10^9/L		2	7	0.02				ABS	ABS	L	Par	P	Par	21	16	.	246	2	2	N	0.01	x10^9/L
	ABS	F	HEMA	HEMATOLOGY - LACTATION PERIOD	BASO	BASO	56	Day 56	2	2504	0.05	0.05		x10^9/L		2	8	0.05				ABS	ABS	L	Par	P	Par	21	16	.	246	2	2	N	0.01	x10^9/L
	ABS	F	HEMA	HEMATOLOGY - LACTATION PERIOD	BASO	BASO	56	Day 56	2	2505	0.04	0.04		x10^9/L		2	9	0.04				ABS	ABS	L	Par	P	Par	21	16	.	246	2	2	N	0.01	x10^9/L
	ABS	F	HEMA	HEMATOLOGY - LACTATION PERIOD	BASO	BASO	56	Day 56	3	3501	0.03	0.03		x10^9/L		3	11	0.03				ABS	ABS	L	Par	P	Par	21	16	.	246	2	2	N	0.01	x10^9/L
	ABS	F	HEMA	HEMATOLOGY - LACTATION PERIOD	BASO	BASO	56	Day 56	3	3503	0.04	0.04		x10^9/L		3	13	0.04				ABS	ABS	L	Par	P	Par	21	16	.	246	2	2	N	0.01	x10^9/L
	ABS	F	HEMA	HEMATOLOGY - LACTATION PERIOD	BASO	BASO	56	Day 56	3	3504	0.04	0.04		x10^9/L		3	14	0.04				ABS	ABS	L	Par	P	Par	21	16	.	246	2	2	N	0.01	x10^9/L
	ABS	F	HEMA	HEMATOLOGY - LACTATION PERIOD	BASO	BASO	56	Day 56	3	3505	0.03	0.03		x10^9/L		3	15	0.03				ABS	ABS	L	Par	P	Par	21	16	.	246	2	2	N	0.01	x10^9/L
	ABS	F	HEMA	HEMATOLOGY - LACTATION PERIOD	BASO	BASO	56	Day 56	4	4502	0.03	0.03		x10^9/L		4	16	0.03				ABS	ABS	L	Par	P	Par	21	16	.	246	2	2	N	0.01	x10^9/L
	ABS	F	HEMA	HEMATOLOGY - LACTATION PERIOD	BASO	BASO	56	Day 56	4	4504	0.02	0.02		x10^9/L		4	17	0.02				ABS	ABS	L	Par	P	Par	21	16	.	246	2	2	N	0.01	x10^9/L
	ABS	F	HEMA	HEMATOLOGY - LACTATION PERIOD	BASO	BASO	56	Day 56	4	4505	0.02	0.02		x10^9/L		4	18	0.02				ABS	ABS	L	Par	P	Par	21	16	.	246	2	2	N	0.01	x10^9/L
	ABS	F	HEMA	HEMATOLOGY - LACTATION PERIOD	BASO	BASO	56	Day 56	4	4506	0.03	0.03		x10^9/L		4	19	0.03				ABS	ABS	L	Par	P	Par	21	16	.	246	2	2	N	0.01	x10^9/L
	ABS	F	HEMA	HEMATOLOGY - LACTATION PERIOD	EOS	EOS	56	Day 56	1	1501	0.34	0.34		x10^9/L		1	1	0.34				ABS	ABS	L	Par	P	Par	21	16	.	245	2	2	N	0.01	x10^9/L
	ABS	F	HEMA	HEMATOLOGY - LACTATION PERIOD	EOS	EOS	56	Day 56	1	1502	0.47	0.47		x10^9/L		1	2	0.47				ABS	ABS	L	Par	P	Par	21	16	.	245	2	2	N	0.01	x10^9/L
	ABS	F	HEMA	HEMATOLOGY - LACTATION PERIOD	EOS	EOS	56	Day 56	1	1503	1.56	1.56		x10^9/L		1	3	1.56				ABS	ABS	L	Par	P	Par	21	16	.	245	2	2	N	0.01	x10^9/L
	ABS	F	HEMA	HEMATOLOGY - LACTATION PERIOD	EOS	EOS	56	Day 56	1	1504	0.98	0.98		x10^9/L		1	4	0.98				ABS	ABS	L	Par	P	Par	21	16	.	245	2	2	N	0.01	x10^9/L
	ABS	F	HEMA	HEMATOLOGY - LACTATION PERIOD	EOS	EOS	56	Day 56	1	1506	0.38	0.38		x10^9/L		1	5	0.38				ABS	ABS	L	Par	P	Par	21	16	.	245	2	2	N	0.01	x10^9/L
	ABS	F	HEMA	HEMATOLOGY - LACTATION PERIOD	EOS	EOS	56	Day 56	2	2501	0.84	0.84		x10^9/L		2	6	0.84				ABS	ABS	L	Par	P	Par	21	16	.	245	2	2	N	0.01	x10^9/L
	ABS	F	HEMA	HEMATOLOGY - LACTATION PERIOD	EOS	EOS	56	Day 56	2	2503	0.29	0.29		x10^9/L		2	7	0.29				ABS	ABS	L	Par	P	Par	21	16	.	245	2	2	N	0.01	x10^9/L
	ABS	F	HEMA	HEMATOLOGY - LACTATION PERIOD	EOS	EOS	56	Day 56	2	2504	0.34	0.34		x10^9/L		2	8	0.34				ABS	ABS	L	Par	P	Par	21	16	.	245	2	2	N	0.01	x10^9/L
	ABS	F	HEMA	HEMATOLOGY - LACTATION PERIOD	EOS	EOS	56	Day 56	2	2505	0.38	0.38		x10^9/L		2	9	0.38				ABS	ABS	L	Par	P	Par	21	16	.	245	2	2	N	0.01	x10^9/L
	ABS	F	HEMA	HEMATOLOGY - LACTATION PERIOD	EOS	EOS	56	Day 56	3	3501	0.82	0.82		x10^9/L		3	11	0.82				ABS	ABS	L	Par	P	Par	21	16	.	245	2	2	N	0.01	x10^9/L
	ABS	F	HEMA	HEMATOLOGY - LACTATION PERIOD	EOS	EOS	56	Day 56	3	3503	1.65	1.65		x10^9/L		3	13	1.65				ABS	ABS	L	Par	P	Par	21	16	.	245	2	2	N	0.01	x10^9/L
	ABS	F	HEMA	HEMATOLOGY - LACTATION PERIOD	EOS	EOS	56	Day 56	3	3504	0.6	0.6		x10^9/L		3	14	0.6				ABS	ABS	L	Par	P	Par	21	16	.	245	2	2	N	0.01	x10^9/L
	ABS	F	HEMA	HEMATOLOGY - LACTATION PERIOD	EOS	EOS	56	Day 56	3	3505	0.27	0.27		x10^9/L		3	15	0.27				ABS	ABS	L	Par	P	Par	21	16	.	245	2	2	N	0.01	x10^9/L
	ABS	F	HEMA	HEMATOLOGY - LACTATION PERIOD	EOS	EOS	56	Day 56	4	4502	0.3	0.3		x10^9/L		4	16	0.3				ABS	ABS	L	Par	P	Par	21	16	.	245	2	2	N	0.01	x10^9/L
	ABS	F	HEMA	HEMATOLOGY - LACTATION PERIOD	EOS	EOS	56	Day 56	4	4504	0.36	0.36		x10^9/L		4	17	0.36				ABS	ABS	L	Par	P	Par	21	16	.	245	2	2	N	0.01	x10^9/L
	ABS	F	HEMA	HEMATOLOGY - LACTATION PERIOD	EOS	EOS	56	Day 56	4	4505	0.53	0.53		x10^9/L		4	18	0.53				ABS	ABS	L	Par	P	Par	21	16	.	245	2	2	N	0.01	x10^9/L
	ABS	F	HEMA	HEMATOLOGY - LACTATION PERIOD	EOS	EOS	56	Day 56	4	4506	0.32	0.32		x10^9/L		4	19	0.32				ABS	ABS	L	Par	P	Par	21	16	.	245	2	2	N	0.01	x10^9/L
	ABS	F	HEMA	HEMATOLOGY - LACTATION PERIOD	HCT	HCT	56	Day 56	1	1501	0.51	0.51		L/L		1	1	0.51				ABS	ABS	L	Par	P	Par	21	16	.	231	1	1	N	0.01	L/L
	ABS	F	HEMA	HEMATOLOGY - LACTATION PERIOD	HCT	HCT	56	Day 56	1	1502	0.49	0.49		L/L		1	2	0.49				ABS	ABS	L	Par	P	Par	21	16	.	231	1	1	N	0.01	L/L
	ABS	F	HEMA	HEMATOLOGY - LACTATION PERIOD	HCT	HCT	56	Day 56	1	1503	0.5	0.5		L/L		1	3	0.5				ABS	ABS	L	Par	P	Par	21	16	.	231	1	1	N	0.01	L/L
	ABS	F	HEMA	HEMATOLOGY - LACTATION PERIOD	HCT	HCT	56	Day 56	1	1504	0.46	0.46		L/L		1	4	0.46				ABS	ABS	L	Par	P	Par	21	16	.	231	1	1	N	0.01	L/L
	ABS	F	HEMA	HEMATOLOGY - LACTATION PERIOD	HCT	HCT	56	Day 56	1	1506	0.57	0.57		L/L		1	5	0.57				ABS	ABS	L	Par	P	Par	21	16	.	231	1	1	N	0.01	L/L
	ABS	F	HEMA	HEMATOLOGY - LACTATION PERIOD	HCT	HCT	56	Day 56	2	2501	0.47	0.47		L/L		2	6	0.47				ABS	ABS	L	Par	P	Par	21	16	.	231	1	1	N	0.01	L/L
	ABS	F	HEMA	HEMATOLOGY - LACTATION PERIOD	HCT	HCT	56	Day 56	2	2503	0.47	0.47		L/L		2	7	0.47				ABS	ABS	L	Par	P	Par	21	16	.	231	1	1	N	0.01	L/L
	ABS	F	HEMA	HEMATOLOGY - LACTATION PERIOD	HCT	HCT	56	Day 56	2	2504	0.59	0.59		L/L		2	8	0.59				ABS	ABS	L	Par	P	Par	21	16	.	231	1	1	N	0.01	L/L
	ABS	F	HEMA	HEMATOLOGY - LACTATION PERIOD	HCT	HCT	56	Day 56	2	2505	0.57	0.57		L/L		2	9	0.57				ABS	ABS	L	Par	P	Par	21	16	.	231	1	1	N	0.01	L/L
	ABS	F	HEMA	HEMATOLOGY - LACTATION PERIOD	HCT	HCT	56	Day 56	3	3501	0.44	0.44		L/L		3	11	0.44				ABS	ABS	L	Par	P	Par	21	16	.	231	1	1	N	0.01	L/L
	ABS	F	HEMA	HEMATOLOGY - LACTATION PERIOD	HCT	HCT	56	Day 56	3	3503	0.44	0.44		L/L		3	13	0.44				ABS	ABS	L	Par	P	Par	21	16	.	231	1	1	N	0.01	L/L
	ABS	F	HEMA	HEMATOLOGY - LACTATION PERIOD	HCT	HCT	56	Day 56	3	3504	0.52	0.52		L/L		3	14	0.52				ABS	ABS	L	Par	P	Par	21	16	.	231	1	1	N	0.01	L/L
	ABS	F	HEMA	HEMATOLOGY - LACTATION PERIOD	HCT	HCT	56	Day 56	3	3505	0.49	0.49		L/L		3	15	0.49				ABS	ABS	L	Par	P	Par	21	16	.	231	1	1	N	0.01	L/L
	ABS	F	HEMA	HEMATOLOGY - LACTATION PERIOD	HCT	HCT	56	Day 56	4	4502	0.48	0.48		L/L		4	16	0.48				ABS	ABS	L	Par	P	Par	21	16	.	231	1	1	N	0.01	L/L
	ABS	F	HEMA	HEMATOLOGY - LACTATION PERIOD	HCT	HCT	56	Day 56	4	4504	0.47	0.47		L/L		4	17	0.47				ABS	ABS	L	Par	P	Par	21	16	.	231	1	1	N	0.01	L/L
	ABS	F	HEMA	HEMATOLOGY - LACTATION PERIOD	HCT	HCT	56	Day 56	4	4505	0.45	0.45		L/L		4	18	0.45				ABS	ABS	L	Par	P	Par	21	16	.	231	1	1	N	0.01	L/L
	ABS	F	HEMA	HEMATOLOGY - LACTATION PERIOD	HCT	HCT	56	Day 56	4	4506	0.53	0.53		L/L		4	19	0.53				ABS	ABS	L	Par	P	Par	21	16	.	231	1	1	N	0.01	L/L
	ABS	F	HEMA	HEMATOLOGY - LACTATION PERIOD	HGB	HGB	56	Day 56	1	1501	173	173		g/L		1	1	173				ABS	ABS	L	Par	P	Par	21	16	.	230	1	1	N	1	g/L
	ABS	F	HEMA	HEMATOLOGY - LACTATION PERIOD	HGB	HGB	56	Day 56	1	1502	166	166		g/L		1	2	166				ABS	ABS	L	Par	P	Par	21	16	.	230	1	1	N	1	g/L
	ABS	F	HEMA	HEMATOLOGY - LACTATION PERIOD	HGB	HGB	56	Day 56	1	1503	170	170		g/L		1	3	170				ABS	ABS	L	Par	P	Par	21	16	.	230	1	1	N	1	g/L
	ABS	F	HEMA	HEMATOLOGY - LACTATION PERIOD	HGB	HGB	56	Day 56	1	1504	158	158		g/L		1	4	158				ABS	ABS	L	Par	P	Par	21	16	.	230	1	1	N	1	g/L
	ABS	F	HEMA	HEMATOLOGY - LACTATION PERIOD	HGB	HGB	56	Day 56	1	1506	189	189		g/L		1	5	189				ABS	ABS	L	Par	P	Par	21	16	.	230	1	1	N	1	g/L
	ABS	F	HEMA	HEMATOLOGY - LACTATION PERIOD	HGB	HGB	56	Day 56	2	2501	157	157		g/L		2	6	157				ABS	ABS	L	Par	P	Par	21	16	.	230	1	1	N	1	g/L
	ABS	F	HEMA	HEMATOLOGY - LACTATION PERIOD	HGB	HGB	56	Day 56	2	2503	156	156		g/L		2	7	156				ABS	ABS	L	Par	P	Par	21	16	.	230	1	1	N	1	g/L
	ABS	F	HEMA	HEMATOLOGY - LACTATION PERIOD	HGB	HGB	56	Day 56	2	2504	193	193		g/L		2	8	193				ABS	ABS	L	Par	P	Par	21	16	.	230	1	1	N	1	g/L
	ABS	F	HEMA	HEMATOLOGY - LACTATION PERIOD	HGB	HGB	56	Day 56	2	2505	190	190		g/L		2	9	190				ABS	ABS	L	Par	P	Par	21	16	.	230	1	1	N	1	g/L
	ABS	F	HEMA	HEMATOLOGY - LACTATION PERIOD	HGB	HGB	56	Day 56	3	3501	149	149		g/L		3	11	149				ABS	ABS	L	Par	P	Par	21	16	.	230	1	1	N	1	g/L
	ABS	F	HEMA	HEMATOLOGY - LACTATION PERIOD	HGB	HGB	56	Day 56	3	3503	148	148		g/L		3	13	148				ABS	ABS	L	Par	P	Par	21	16	.	230	1	1	N	1	g/L
	ABS	F	HEMA	HEMATOLOGY - LACTATION PERIOD	HGB	HGB	56	Day 56	3	3504	173	173		g/L		3	14	173				ABS	ABS	L	Par	P	Par	21	16	.	230	1	1	N	1	g/L
	ABS	F	HEMA	HEMATOLOGY - LACTATION PERIOD	HGB	HGB	56	Day 56	3	3505	164	164		g/L		3	15	164				ABS	ABS	L	Par	P	Par	21	16	.	230	1	1	N	1	g/L
	ABS	F	HEMA	HEMATOLOGY - LACTATION PERIOD	HGB	HGB	56	Day 56	4	4502	160	160		g/L		4	16	160				ABS	ABS	L	Par	P	Par	21	16	.	230	1	1	N	1	g/L
	ABS	F	HEMA	HEMATOLOGY - LACTATION PERIOD	HGB	HGB	56	Day 56	4	4504	158	158		g/L		4	17	158				ABS	ABS	L	Par	P	Par	21	16	.	230	1	1	N	1	g/L
	ABS	F	HEMA	HEMATOLOGY - LACTATION PERIOD	HGB	HGB	56	Day 56	4	4505	152	152		g/L		4	18	152				ABS	ABS	L	Par	P	Par	21	16	.	230	1	1	N	1	g/L
	ABS	F	HEMA	HEMATOLOGY - LACTATION PERIOD	HGB	HGB	56	Day 56	4	4506	181	181		g/L		4	19	181				ABS	ABS	L	Par	P	Par	21	16	.	230	1	1	N	1	g/L
	ABS	F	HEMA	HEMATOLOGY - LACTATION PERIOD	LUC	LUC	56	Day 56	1	1501	0.01	0.01		x10^9/L		1	1	0.01				ABS	ABS	L	Par	P	Par	21	16	.	247	2	2	N	0.01	x10^9/L
	ABS	F	HEMA	HEMATOLOGY - LACTATION PERIOD	LUC	LUC	56	Day 56	1	1502	0.04	0.04		x10^9/L		1	2	0.04				ABS	ABS	L	Par	P	Par	21	16	.	247	2	2	N	0.01	x10^9/L
	ABS	F	HEMA	HEMATOLOGY - LACTATION PERIOD	LUC	LUC	56	Day 56	1	1503	0.03	0.03		x10^9/L		1	3	0.03				ABS	ABS	L	Par	P	Par	21	16	.	247	2	2	N	0.01	x10^9/L
	ABS	F	HEMA	HEMATOLOGY - LACTATION PERIOD	LUC	LUC	56	Day 56	1	1504	0.03	0.03		x10^9/L		1	4	0.03				ABS	ABS	L	Par	P	Par	21	16	.	247	2	2	N	0.01	x10^9/L
	ABS	F	HEMA	HEMATOLOGY - LACTATION PERIOD	LUC	LUC	56	Day 56	1	1506	0.05	0.05		x10^9/L		1	5	0.05				ABS	ABS	L	Par	P	Par	21	16	.	247	2	2	N	0.01	x10^9/L
	ABS	F	HEMA	HEMATOLOGY - LACTATION PERIOD	LUC	LUC	56	Day 56	2	2501	0.02	0.02		x10^9/L		2	6	0.02				ABS	ABS	L	Par	P	Par	21	16	.	247	2	2	N	0.01	x10^9/L
	ABS	F	HEMA	HEMATOLOGY - LACTATION PERIOD	LUC	LUC	56	Day 56	2	2503	0.02	0.02		x10^9/L		2	7	0.02				ABS	ABS	L	Par	P	Par	21	16	.	247	2	2	N	0.01	x10^9/L
	ABS	F	HEMA	HEMATOLOGY - LACTATION PERIOD	LUC	LUC	56	Day 56	2	2504	0.02	0.02		x10^9/L		2	8	0.02				ABS	ABS	L	Par	P	Par	21	16	.	247	2	2	N	0.01	x10^9/L
	ABS	F	HEMA	HEMATOLOGY - LACTATION PERIOD	LUC	LUC	56	Day 56	2	2505	0.02	0.02		x10^9/L		2	9	0.02				ABS	ABS	L	Par	P	Par	21	16	.	247	2	2	N	0.01	x10^9/L
	ABS	F	HEMA	HEMATOLOGY - LACTATION PERIOD	LUC	LUC	56	Day 56	3	3501	0.04	0.04		x10^9/L		3	11	0.04				ABS	ABS	L	Par	P	Par	21	16	.	247	2	2	N	0.01	x10^9/L
	ABS	F	HEMA	HEMATOLOGY - LACTATION PERIOD	LUC	LUC	56	Day 56	3	3503	0.04	0.04		x10^9/L		3	13	0.04				ABS	ABS	L	Par	P	Par	21	16	.	247	2	2	N	0.01	x10^9/L
	ABS	F	HEMA	HEMATOLOGY - LACTATION PERIOD	LUC	LUC	56	Day 56	3	3504	0.03	0.03		x10^9/L		3	14	0.03				ABS	ABS	L	Par	P	Par	21	16	.	247	2	2	N	0.01	x10^9/L
	ABS	F	HEMA	HEMATOLOGY - LACTATION PERIOD	LUC	LUC	56	Day 56	3	3505	0.03	0.03		x10^9/L		3	15	0.03				ABS	ABS	L	Par	P	Par	21	16	.	247	2	2	N	0.01	x10^9/L
	ABS	F	HEMA	HEMATOLOGY - LACTATION PERIOD	LUC	LUC	56	Day 56	4	4502	0.02	0.02		x10^9/L		4	16	0.02				ABS	ABS	L	Par	P	Par	21	16	.	247	2	2	N	0.01	x10^9/L
	ABS	F	HEMA	HEMATOLOGY - LACTATION PERIOD	LUC	LUC	56	Day 56	4	4504	0.01	0.01		x10^9/L		4	17	0.01				ABS	ABS	L	Par	P	Par	21	16	.	247	2	2	N	0.01	x10^9/L
	ABS	F	HEMA	HEMATOLOGY - LACTATION PERIOD	LUC	LUC	56	Day 56	4	4505	0.02	0.02		x10^9/L		4	18	0.02				ABS	ABS	L	Par	P	Par	21	16	.	247	2	2	N	0.01	x10^9/L
	ABS	F	HEMA	HEMATOLOGY - LACTATION PERIOD	LUC	LUC	56	Day 56	4	4506	0.03	0.03		x10^9/L		4	19	0.03				ABS	ABS	L	Par	P	Par	21	16	.	247	2	2	N	0.01	x10^9/L
	ABS	F	HEMA	HEMATOLOGY - LACTATION PERIOD	LYMPH	LYMPH	56	Day 56	1	1501	1.24	1.24		x10^9/L		1	1	1.24				ABS	ABS	L	Par	P	Par	21	16	.	243	2	2	N	0.01	x10^9/L
	ABS	F	HEMA	HEMATOLOGY - LACTATION PERIOD	LYMPH	LYMPH	56	Day 56	1	1502	2.97	2.97		x10^9/L		1	2	2.97				ABS	ABS	L	Par	P	Par	21	16	.	243	2	2	N	0.01	x10^9/L
	ABS	F	HEMA	HEMATOLOGY - LACTATION PERIOD	LYMPH	LYMPH	56	Day 56	1	1503	2.18	2.18		x10^9/L		1	3	2.18				ABS	ABS	L	Par	P	Par	21	16	.	243	2	2	N	0.01	x10^9/L
	ABS	F	HEMA	HEMATOLOGY - LACTATION PERIOD	LYMPH	LYMPH	56	Day 56	1	1504	2.82	2.82		x10^9/L		1	4	2.82				ABS	ABS	L	Par	P	Par	21	16	.	243	2	2	N	0.01	x10^9/L
	ABS	F	HEMA	HEMATOLOGY - LACTATION PERIOD	LYMPH	LYMPH	56	Day 56	1	1506	2.26	2.26		x10^9/L		1	5	2.26				ABS	ABS	L	Par	P	Par	21	16	.	243	2	2	N	0.01	x10^9/L
	ABS	F	HEMA	HEMATOLOGY - LACTATION PERIOD	LYMPH	LYMPH	56	Day 56	2	2501	1.89	1.89		x10^9/L		2	6	1.89				ABS	ABS	L	Par	P	Par	21	16	.	243	2	2	N	0.01	x10^9/L
	ABS	F	HEMA	HEMATOLOGY - LACTATION PERIOD	LYMPH	LYMPH	56	Day 56	2	2503	1.25	1.25		x10^9/L		2	7	1.25				ABS	ABS	L	Par	P	Par	21	16	.	243	2	2	N	0.01	x10^9/L
	ABS	F	HEMA	HEMATOLOGY - LACTATION PERIOD	LYMPH	LYMPH	56	Day 56	2	2504	2.73	2.73		x10^9/L		2	8	2.73				ABS	ABS	L	Par	P	Par	21	16	.	243	2	2	N	0.01	x10^9/L
	ABS	F	HEMA	HEMATOLOGY - LACTATION PERIOD	LYMPH	LYMPH	56	Day 56	2	2505	1.6	1.6		x10^9/L		2	9	1.6				ABS	ABS	L	Par	P	Par	21	16	.	243	2	2	N	0.01	x10^9/L
	ABS	F	HEMA	HEMATOLOGY - LACTATION PERIOD	LYMPH	LYMPH	56	Day 56	3	3501	1.6	1.6		x10^9/L		3	11	1.6				ABS	ABS	L	Par	P	Par	21	16	.	243	2	2	N	0.01	x10^9/L
	ABS	F	HEMA	HEMATOLOGY - LACTATION PERIOD	LYMPH	LYMPH	56	Day 56	3	3503	2.29	2.29		x10^9/L		3	13	2.29				ABS	ABS	L	Par	P	Par	21	16	.	243	2	2	N	0.01	x10^9/L
	ABS	F	HEMA	HEMATOLOGY - LACTATION PERIOD	LYMPH	LYMPH	56	Day 56	3	3504	1.76	1.76		x10^9/L		3	14	1.76				ABS	ABS	L	Par	P	Par	21	16	.	243	2	2	N	0.01	x10^9/L
	ABS	F	HEMA	HEMATOLOGY - LACTATION PERIOD	LYMPH	LYMPH	56	Day 56	3	3505	2.6	2.6		x10^9/L		3	15	2.6				ABS	ABS	L	Par	P	Par	21	16	.	243	2	2	N	0.01	x10^9/L
	ABS	F	HEMA	HEMATOLOGY - LACTATION PERIOD	LYMPH	LYMPH	56	Day 56	4	4502	2.38	2.38		x10^9/L		4	16	2.38				ABS	ABS	L	Par	P	Par	21	16	.	243	2	2	N	0.01	x10^9/L
	ABS	F	HEMA	HEMATOLOGY - LACTATION PERIOD	LYMPH	LYMPH	56	Day 56	4	4504	1.74	1.74		x10^9/L		4	17	1.74				ABS	ABS	L	Par	P	Par	21	16	.	243	2	2	N	0.01	x10^9/L
	ABS	F	HEMA	HEMATOLOGY - LACTATION PERIOD	LYMPH	LYMPH	56	Day 56	4	4505	2.01	2.01		x10^9/L		4	18	2.01				ABS	ABS	L	Par	P	Par	21	16	.	243	2	2	N	0.01	x10^9/L
	ABS	F	HEMA	HEMATOLOGY - LACTATION PERIOD	LYMPH	LYMPH	56	Day 56	4	4506	2.78	2.78		x10^9/L		4	19	2.78				ABS	ABS	L	Par	P	Par	21	16	.	243	2	2	N	0.01	x10^9/L
	ABS	F	HEMA	HEMATOLOGY - LACTATION PERIOD	MCH	MCH	56	Day 56	1	1501	24.1	24.1		pg		1	1	24.1				ABS	ABS	L	Par	P	Par	21	16	.	233	1	1	N	0.1	pg
	ABS	F	HEMA	HEMATOLOGY - LACTATION PERIOD	MCH	MCH	56	Day 56	1	1502	23.7	23.7		pg		1	2	23.7				ABS	ABS	L	Par	P	Par	21	16	.	233	1	1	N	0.1	pg
	ABS	F	HEMA	HEMATOLOGY - LACTATION PERIOD	MCH	MCH	56	Day 56	1	1503	24.4	24.4		pg		1	3	24.4				ABS	ABS	L	Par	P	Par	21	16	.	233	1	1	N	0.1	pg
	ABS	F	HEMA	HEMATOLOGY - LACTATION PERIOD	MCH	MCH	56	Day 56	1	1504	23.9	23.9		pg		1	4	23.9				ABS	ABS	L	Par	P	Par	21	16	.	233	1	1	N	0.1	pg
	ABS	F	HEMA	HEMATOLOGY - LACTATION PERIOD	MCH	MCH	56	Day 56	1	1506	23	23		pg		1	5	23				ABS	ABS	L	Par	P	Par	21	16	.	233	1	1	N	0.1	pg
	ABS	F	HEMA	HEMATOLOGY - LACTATION PERIOD	MCH	MCH	56	Day 56	2	2501	23.2	23.2		pg		2	6	23.2				ABS	ABS	L	Par	P	Par	21	16	.	233	1	1	N	0.1	pg
	ABS	F	HEMA	HEMATOLOGY - LACTATION PERIOD	MCH	MCH	56	Day 56	2	2503	23	23		pg		2	7	23				ABS	ABS	L	Par	P	Par	21	16	.	233	1	1	N	0.1	pg
	ABS	F	HEMA	HEMATOLOGY - LACTATION PERIOD	MCH	MCH	56	Day 56	2	2504	22.9	22.9		pg		2	8	22.9				ABS	ABS	L	Par	P	Par	21	16	.	233	1	1	N	0.1	pg
	ABS	F	HEMA	HEMATOLOGY - LACTATION PERIOD	MCH	MCH	56	Day 56	2	2505	23.7	23.7		pg		2	9	23.7				ABS	ABS	L	Par	P	Par	21	16	.	233	1	1	N	0.1	pg
	ABS	F	HEMA	HEMATOLOGY - LACTATION PERIOD	MCH	MCH	56	Day 56	3	3501	23.3	23.3		pg		3	11	23.3				ABS	ABS	L	Par	P	Par	21	16	.	233	1	1	N	0.1	pg
	ABS	F	HEMA	HEMATOLOGY - LACTATION PERIOD	MCH	MCH	56	Day 56	3	3503	21.7	21.7		pg		3	13	21.7				ABS	ABS	L	Par	P	Par	21	16	.	233	1	1	N	0.1	pg
	ABS	F	HEMA	HEMATOLOGY - LACTATION PERIOD	MCH	MCH	56	Day 56	3	3504	23.5	23.5		pg		3	14	23.5				ABS	ABS	L	Par	P	Par	21	16	.	233	1	1	N	0.1	pg
	ABS	F	HEMA	HEMATOLOGY - LACTATION PERIOD	MCH	MCH	56	Day 56	3	3505	22	22		pg		3	15	22				ABS	ABS	L	Par	P	Par	21	16	.	233	1	1	N	0.1	pg
	ABS	F	HEMA	HEMATOLOGY - LACTATION PERIOD	MCH	MCH	56	Day 56	4	4502	23.2	23.2		pg		4	16	23.2				ABS	ABS	L	Par	P	Par	21	16	.	233	1	1	N	0.1	pg
	ABS	F	HEMA	HEMATOLOGY - LACTATION PERIOD	MCH	MCH	56	Day 56	4	4504	23.3	23.3		pg		4	17	23.3				ABS	ABS	L	Par	P	Par	21	16	.	233	1	1	N	0.1	pg
	ABS	F	HEMA	HEMATOLOGY - LACTATION PERIOD	MCH	MCH	56	Day 56	4	4505	21	21		pg		4	18	21				ABS	ABS	L	Par	P	Par	21	16	.	233	1	1	N	0.1	pg
	ABS	F	HEMA	HEMATOLOGY - LACTATION PERIOD	MCH	MCH	56	Day 56	4	4506	24.3	24.3		pg		4	19	24.3				ABS	ABS	L	Par	P	Par	21	16	.	233	1	1	N	0.1	pg
	ABS	F	HEMA	HEMATOLOGY - LACTATION PERIOD	MCHC	MCHC	56	Day 56	1	1501	339	339		g/L		1	1	339				ABS	ABS	L	Par	P	Par	21	16	.	234	1	1	N	1	g/L
	ABS	F	HEMA	HEMATOLOGY - LACTATION PERIOD	MCHC	MCHC	56	Day 56	1	1502	339	339		g/L		1	2	339				ABS	ABS	L	Par	P	Par	21	16	.	234	1	1	N	1	g/L
	ABS	F	HEMA	HEMATOLOGY - LACTATION PERIOD	MCHC	MCHC	56	Day 56	1	1503	339	339		g/L		1	3	339				ABS	ABS	L	Par	P	Par	21	16	.	234	1	1	N	1	g/L
	ABS	F	HEMA	HEMATOLOGY - LACTATION PERIOD	MCHC	MCHC	56	Day 56	1	1504	341	341		g/L		1	4	341				ABS	ABS	L	Par	P	Par	21	16	.	234	1	1	N	1	g/L
	ABS	F	HEMA	HEMATOLOGY - LACTATION PERIOD	MCHC	MCHC	56	Day 56	1	1506	334	334		g/L		1	5	334				ABS	ABS	L	Par	P	Par	21	16	.	234	1	1	N	1	g/L
	ABS	F	HEMA	HEMATOLOGY - LACTATION PERIOD	MCHC	MCHC	56	Day 56	2	2501	337	337		g/L		2	6	337				ABS	ABS	L	Par	P	Par	21	16	.	234	1	1	N	1	g/L
	ABS	F	HEMA	HEMATOLOGY - LACTATION PERIOD	MCHC	MCHC	56	Day 56	2	2503	332	332		g/L		2	7	332				ABS	ABS	L	Par	P	Par	21	16	.	234	1	1	N	1	g/L
	ABS	F	HEMA	HEMATOLOGY - LACTATION PERIOD	MCHC	MCHC	56	Day 56	2	2504	329	329		g/L		2	8	329				ABS	ABS	L	Par	P	Par	21	16	.	234	1	1	N	1	g/L
	ABS	F	HEMA	HEMATOLOGY - LACTATION PERIOD	MCHC	MCHC	56	Day 56	2	2505	336	336		g/L		2	9	336				ABS	ABS	L	Par	P	Par	21	16	.	234	1	1	N	1	g/L
	ABS	F	HEMA	HEMATOLOGY - LACTATION PERIOD	MCHC	MCHC	56	Day 56	3	3501	337	337		g/L		3	11	337				ABS	ABS	L	Par	P	Par	21	16	.	234	1	1	N	1	g/L
	ABS	F	HEMA	HEMATOLOGY - LACTATION PERIOD	MCHC	MCHC	56	Day 56	3	3503	333	333		g/L		3	13	333				ABS	ABS	L	Par	P	Par	21	16	.	234	1	1	N	1	g/L
	ABS	F	HEMA	HEMATOLOGY - LACTATION PERIOD	MCHC	MCHC	56	Day 56	3	3504	335	335		g/L		3	14	335				ABS	ABS	L	Par	P	Par	21	16	.	234	1	1	N	1	g/L
	ABS	F	HEMA	HEMATOLOGY - LACTATION PERIOD	MCHC	MCHC	56	Day 56	3	3505	332	332		g/L		3	15	332				ABS	ABS	L	Par	P	Par	21	16	.	234	1	1	N	1	g/L
	ABS	F	HEMA	HEMATOLOGY - LACTATION PERIOD	MCHC	MCHC	56	Day 56	4	4502	334	334		g/L		4	16	334				ABS	ABS	L	Par	P	Par	21	16	.	234	1	1	N	1	g/L
	ABS	F	HEMA	HEMATOLOGY - LACTATION PERIOD	MCHC	MCHC	56	Day 56	4	4504	336	336		g/L		4	17	336				ABS	ABS	L	Par	P	Par	21	16	.	234	1	1	N	1	g/L
	ABS	F	HEMA	HEMATOLOGY - LACTATION PERIOD	MCHC	MCHC	56	Day 56	4	4505	334	334		g/L		4	18	334				ABS	ABS	L	Par	P	Par	21	16	.	234	1	1	N	1	g/L
	ABS	F	HEMA	HEMATOLOGY - LACTATION PERIOD	MCHC	MCHC	56	Day 56	4	4506	339	339		g/L		4	19	339				ABS	ABS	L	Par	P	Par	21	16	.	234	1	1	N	1	g/L
	ABS	F	HEMA	HEMATOLOGY - LACTATION PERIOD	MCV	MCV	56	Day 56	1	1501	71.1	71.1		fL		1	1	71.1				ABS	ABS	L	Par	P	Par	21	16	.	232	1	1	N	0.1	fL
	ABS	F	HEMA	HEMATOLOGY - LACTATION PERIOD	MCV	MCV	56	Day 56	1	1502	69.8	69.8		fL		1	2	69.8				ABS	ABS	L	Par	P	Par	21	16	.	232	1	1	N	0.1	fL
	ABS	F	HEMA	HEMATOLOGY - LACTATION PERIOD	MCV	MCV	56	Day 56	1	1503	72.1	72.1		fL		1	3	72.1				ABS	ABS	L	Par	P	Par	21	16	.	232	1	1	N	0.1	fL
	ABS	F	HEMA	HEMATOLOGY - LACTATION PERIOD	MCV	MCV	56	Day 56	1	1504	70	70		fL		1	4	70				ABS	ABS	L	Par	P	Par	21	16	.	232	1	1	N	0.1	fL
	ABS	F	HEMA	HEMATOLOGY - LACTATION PERIOD	MCV	MCV	56	Day 56	1	1506	68.8	68.8		fL		1	5	68.8				ABS	ABS	L	Par	P	Par	21	16	.	232	1	1	N	0.1	fL
	ABS	F	HEMA	HEMATOLOGY - LACTATION PERIOD	MCV	MCV	56	Day 56	2	2501	69	69		fL		2	6	69				ABS	ABS	L	Par	P	Par	21	16	.	232	1	1	N	0.1	fL
	ABS	F	HEMA	HEMATOLOGY - LACTATION PERIOD	MCV	MCV	56	Day 56	2	2503	69.4	69.4		fL		2	7	69.4				ABS	ABS	L	Par	P	Par	21	16	.	232	1	1	N	0.1	fL
	ABS	F	HEMA	HEMATOLOGY - LACTATION PERIOD	MCV	MCV	56	Day 56	2	2504	69.7	69.7		fL		2	8	69.7				ABS	ABS	L	Par	P	Par	21	16	.	232	1	1	N	0.1	fL
	ABS	F	HEMA	HEMATOLOGY - LACTATION PERIOD	MCV	MCV	56	Day 56	2	2505	70.5	70.5		fL		2	9	70.5				ABS	ABS	L	Par	P	Par	21	16	.	232	1	1	N	0.1	fL
	ABS	F	HEMA	HEMATOLOGY - LACTATION PERIOD	MCV	MCV	56	Day 56	3	3501	69.2	69.2		fL		3	11	69.2				ABS	ABS	L	Par	P	Par	21	16	.	232	1	1	N	0.1	fL
	ABS	F	HEMA	HEMATOLOGY - LACTATION PERIOD	MCV	MCV	56	Day 56	3	3503	65	65		fL		3	13	65				ABS	ABS	L	Par	P	Par	21	16	.	232	1	1	N	0.1	fL
	ABS	F	HEMA	HEMATOLOGY - LACTATION PERIOD	MCV	MCV	56	Day 56	3	3504	70.2	70.2		fL		3	14	70.2				ABS	ABS	L	Par	P	Par	21	16	.	232	1	1	N	0.1	fL
	ABS	F	HEMA	HEMATOLOGY - LACTATION PERIOD	MCV	MCV	56	Day 56	3	3505	66.2	66.2		fL		3	15	66.2				ABS	ABS	L	Par	P	Par	21	16	.	232	1	1	N	0.1	fL
	ABS	F	HEMA	HEMATOLOGY - LACTATION PERIOD	MCV	MCV	56	Day 56	4	4502	69.6	69.6		fL		4	16	69.6				ABS	ABS	L	Par	P	Par	21	16	.	232	1	1	N	0.1	fL
	ABS	F	HEMA	HEMATOLOGY - LACTATION PERIOD	MCV	MCV	56	Day 56	4	4504	69.4	69.4		fL		4	17	69.4				ABS	ABS	L	Par	P	Par	21	16	.	232	1	1	N	0.1	fL
	ABS	F	HEMA	HEMATOLOGY - LACTATION PERIOD	MCV	MCV	56	Day 56	4	4505	62.9	62.9		fL		4	18	62.9				ABS	ABS	L	Par	P	Par	21	16	.	232	1	1	N	0.1	fL
	ABS	F	HEMA	HEMATOLOGY - LACTATION PERIOD	MCV	MCV	56	Day 56	4	4506	71.7	71.7		fL		4	19	71.7				ABS	ABS	L	Par	P	Par	21	16	.	232	1	1	N	0.1	fL
	ABS	F	HEMA	HEMATOLOGY - LACTATION PERIOD	MONO	MONO	56	Day 56	1	1501	0.38	0.38		x10^9/L		1	1	0.38				ABS	ABS	L	Par	P	Par	21	16	.	244	2	2	N	0.01	x10^9/L
	ABS	F	HEMA	HEMATOLOGY - LACTATION PERIOD	MONO	MONO	56	Day 56	1	1502	0.44	0.44		x10^9/L		1	2	0.44				ABS	ABS	L	Par	P	Par	21	16	.	244	2	2	N	0.01	x10^9/L
	ABS	F	HEMA	HEMATOLOGY - LACTATION PERIOD	MONO	MONO	56	Day 56	1	1503	0.48	0.48		x10^9/L		1	3	0.48				ABS	ABS	L	Par	P	Par	21	16	.	244	2	2	N	0.01	x10^9/L
	ABS	F	HEMA	HEMATOLOGY - LACTATION PERIOD	MONO	MONO	56	Day 56	1	1504	0.44	0.44		x10^9/L		1	4	0.44				ABS	ABS	L	Par	P	Par	21	16	.	244	2	2	N	0.01	x10^9/L
	ABS	F	HEMA	HEMATOLOGY - LACTATION PERIOD	MONO	MONO	56	Day 56	1	1506	0.27	0.27		x10^9/L		1	5	0.27				ABS	ABS	L	Par	P	Par	21	16	.	244	2	2	N	0.01	x10^9/L
	ABS	F	HEMA	HEMATOLOGY - LACTATION PERIOD	MONO	MONO	56	Day 56	2	2501	0.31	0.31		x10^9/L		2	6	0.31				ABS	ABS	L	Par	P	Par	21	16	.	244	2	2	N	0.01	x10^9/L
	ABS	F	HEMA	HEMATOLOGY - LACTATION PERIOD	MONO	MONO	56	Day 56	2	2503	0.25	0.25		x10^9/L		2	7	0.25				ABS	ABS	L	Par	P	Par	21	16	.	244	2	2	N	0.01	x10^9/L
	ABS	F	HEMA	HEMATOLOGY - LACTATION PERIOD	MONO	MONO	56	Day 56	2	2504	0.31	0.31		x10^9/L		2	8	0.31				ABS	ABS	L	Par	P	Par	21	16	.	244	2	2	N	0.01	x10^9/L
	ABS	F	HEMA	HEMATOLOGY - LACTATION PERIOD	MONO	MONO	56	Day 56	2	2505	0.36	0.36		x10^9/L		2	9	0.36				ABS	ABS	L	Par	P	Par	21	16	.	244	2	2	N	0.01	x10^9/L
	ABS	F	HEMA	HEMATOLOGY - LACTATION PERIOD	MONO	MONO	56	Day 56	3	3501	0.62	0.62		x10^9/L		3	11	0.62				ABS	ABS	L	Par	P	Par	21	16	.	244	2	2	N	0.01	x10^9/L
	ABS	F	HEMA	HEMATOLOGY - LACTATION PERIOD	MONO	MONO	56	Day 56	3	3503	0.63	0.63		x10^9/L		3	13	0.63				ABS	ABS	L	Par	P	Par	21	16	.	244	2	2	N	0.01	x10^9/L
	ABS	F	HEMA	HEMATOLOGY - LACTATION PERIOD	MONO	MONO	56	Day 56	3	3504	0.52	0.52		x10^9/L		3	14	0.52				ABS	ABS	L	Par	P	Par	21	16	.	244	2	2	N	0.01	x10^9/L
	ABS	F	HEMA	HEMATOLOGY - LACTATION PERIOD	MONO	MONO	56	Day 56	3	3505	0.34	0.34		x10^9/L		3	15	0.34				ABS	ABS	L	Par	P	Par	21	16	.	244	2	2	N	0.01	x10^9/L
	ABS	F	HEMA	HEMATOLOGY - LACTATION PERIOD	MONO	MONO	56	Day 56	4	4502	0.39	0.39		x10^9/L		4	16	0.39				ABS	ABS	L	Par	P	Par	21	16	.	244	2	2	N	0.01	x10^9/L
	ABS	F	HEMA	HEMATOLOGY - LACTATION PERIOD	MONO	MONO	56	Day 56	4	4504	0.32	0.32		x10^9/L		4	17	0.32				ABS	ABS	L	Par	P	Par	21	16	.	244	2	2	N	0.01	x10^9/L
	ABS	F	HEMA	HEMATOLOGY - LACTATION PERIOD	MONO	MONO	56	Day 56	4	4505	0.42	0.42		x10^9/L		4	18	0.42				ABS	ABS	L	Par	P	Par	21	16	.	244	2	2	N	0.01	x10^9/L
	ABS	F	HEMA	HEMATOLOGY - LACTATION PERIOD	MONO	MONO	56	Day 56	4	4506	0.63	0.63		x10^9/L		4	19	0.63				ABS	ABS	L	Par	P	Par	21	16	.	244	2	2	N	0.01	x10^9/L
	ABS	F	HEMA	HEMATOLOGY - LACTATION PERIOD	NEUT	NEUT	56	Day 56	1	1501	3.09	3.09		x10^9/L		1	1	3.09				ABS	ABS	L	Par	P	Par	21	16	.	242	2	2	N	0.01	x10^9/L
	ABS	F	HEMA	HEMATOLOGY - LACTATION PERIOD	NEUT	NEUT	56	Day 56	1	1502	4.82	4.82		x10^9/L		1	2	4.82				ABS	ABS	L	Par	P	Par	21	16	.	242	2	2	N	0.01	x10^9/L
	ABS	F	HEMA	HEMATOLOGY - LACTATION PERIOD	NEUT	NEUT	56	Day 56	1	1503	3.23	3.23		x10^9/L		1	3	3.23				ABS	ABS	L	Par	P	Par	21	16	.	242	2	2	N	0.01	x10^9/L
	ABS	F	HEMA	HEMATOLOGY - LACTATION PERIOD	NEUT	NEUT	56	Day 56	1	1504	5.16	5.16		x10^9/L		1	4	5.16				ABS	ABS	L	Par	P	Par	21	16	.	242	2	2	N	0.01	x10^9/L
	ABS	F	HEMA	HEMATOLOGY - LACTATION PERIOD	NEUT	NEUT	56	Day 56	1	1506	3.77	3.77		x10^9/L		1	5	3.77				ABS	ABS	L	Par	P	Par	21	16	.	242	2	2	N	0.01	x10^9/L
	ABS	F	HEMA	HEMATOLOGY - LACTATION PERIOD	NEUT	NEUT	56	Day 56	2	2501	4.91	4.91		x10^9/L		2	6	4.91				ABS	ABS	L	Par	P	Par	21	16	.	242	2	2	N	0.01	x10^9/L
	ABS	F	HEMA	HEMATOLOGY - LACTATION PERIOD	NEUT	NEUT	56	Day 56	2	2503	5.37	5.37		x10^9/L		2	7	5.37				ABS	ABS	L	Par	P	Par	21	16	.	242	2	2	N	0.01	x10^9/L
	ABS	F	HEMA	HEMATOLOGY - LACTATION PERIOD	NEUT	NEUT	56	Day 56	2	2504	4.58	4.58		x10^9/L		2	8	4.58				ABS	ABS	L	Par	P	Par	21	16	.	242	2	2	N	0.01	x10^9/L
	ABS	F	HEMA	HEMATOLOGY - LACTATION PERIOD	NEUT	NEUT	56	Day 56	2	2505	5.14	5.14		x10^9/L		2	9	5.14				ABS	ABS	L	Par	P	Par	21	16	.	242	2	2	N	0.01	x10^9/L
	ABS	F	HEMA	HEMATOLOGY - LACTATION PERIOD	NEUT	NEUT	56	Day 56	3	3501	5.51	5.51		x10^9/L		3	11	5.51				ABS	ABS	L	Par	P	Par	21	16	.	242	2	2	N	0.01	x10^9/L
	ABS	F	HEMA	HEMATOLOGY - LACTATION PERIOD	NEUT	NEUT	56	Day 56	3	3503	7.13	7.13		x10^9/L		3	13	7.13				ABS	ABS	L	Par	P	Par	21	16	.	242	2	2	N	0.01	x10^9/L
	ABS	F	HEMA	HEMATOLOGY - LACTATION PERIOD	NEUT	NEUT	56	Day 56	3	3504	6.61	6.61		x10^9/L		3	14	6.61				ABS	ABS	L	Par	P	Par	21	16	.	242	2	2	N	0.01	x10^9/L
	ABS	F	HEMA	HEMATOLOGY - LACTATION PERIOD	NEUT	NEUT	56	Day 56	3	3505	6.45	6.45		x10^9/L		3	15	6.45				ABS	ABS	L	Par	P	Par	21	16	.	242	2	2	N	0.01	x10^9/L
	ABS	F	HEMA	HEMATOLOGY - LACTATION PERIOD	NEUT	NEUT	56	Day 56	4	4502	3.12	3.12		x10^9/L		4	16	3.12				ABS	ABS	L	Par	P	Par	21	16	.	242	2	2	N	0.01	x10^9/L
	ABS	F	HEMA	HEMATOLOGY - LACTATION PERIOD	NEUT	NEUT	56	Day 56	4	4504	5.31	5.31		x10^9/L		4	17	5.31				ABS	ABS	L	Par	P	Par	21	16	.	242	2	2	N	0.01	x10^9/L
	ABS	F	HEMA	HEMATOLOGY - LACTATION PERIOD	NEUT	NEUT	56	Day 56	4	4505	5.82	5.82		x10^9/L		4	18	5.82				ABS	ABS	L	Par	P	Par	21	16	.	242	2	2	N	0.01	x10^9/L
	ABS	F	HEMA	HEMATOLOGY - LACTATION PERIOD	NEUT	NEUT	56	Day 56	4	4506	5.74	5.74		x10^9/L		4	19	5.74				ABS	ABS	L	Par	P	Par	21	16	.	242	2	2	N	0.01	x10^9/L
	ABS	F	HEMA	HEMATOLOGY - LACTATION PERIOD	PLT	PLT	56	Day 56	1	1501	331	331		x10^9/L		1	1	331				ABS	ABS	L	Par	P	Par	21	16	.	237	1	1	N	1	x10^9/L
	ABS	F	HEMA	HEMATOLOGY - LACTATION PERIOD	PLT	PLT	56	Day 56	1	1502	376	376		x10^9/L		1	2	376				ABS	ABS	L	Par	P	Par	21	16	.	237	1	1	N	1	x10^9/L
	ABS	F	HEMA	HEMATOLOGY - LACTATION PERIOD	PLT	PLT	56	Day 56	1	1503	327	327		x10^9/L		1	3	327				ABS	ABS	L	Par	P	Par	21	16	.	237	1	1	N	1	x10^9/L
	ABS	F	HEMA	HEMATOLOGY - LACTATION PERIOD	PLT	PLT	56	Day 56	1	1504	223	223		x10^9/L		1	4	223				ABS	ABS	L	Par	P	Par	21	16	.	237	1	1	N	1	x10^9/L
	ABS	F	HEMA	HEMATOLOGY - LACTATION PERIOD	PLT	PLT	56	Day 56	1	1506	363	363		x10^9/L		1	5	363				ABS	ABS	L	Par	P	Par	21	16	.	237	1	1	N	1	x10^9/L
	ABS	F	HEMA	HEMATOLOGY - LACTATION PERIOD	PLT	PLT	56	Day 56	2	2501	317	317		x10^9/L		2	6	317				ABS	ABS	L	Par	P	Par	21	16	.	237	1	1	N	1	x10^9/L
	ABS	F	HEMA	HEMATOLOGY - LACTATION PERIOD	PLT	PLT	56	Day 56	2	2503	284	284		x10^9/L		2	7	284				ABS	ABS	L	Par	P	Par	21	16	.	237	1	1	N	1	x10^9/L
	ABS	F	HEMA	HEMATOLOGY - LACTATION PERIOD	PLT	PLT	56	Day 56	2	2504	393	393		x10^9/L		2	8	393				ABS	ABS	L	Par	P	Par	21	16	.	237	1	1	N	1	x10^9/L
	ABS	F	HEMA	HEMATOLOGY - LACTATION PERIOD	PLT	PLT	56	Day 56	2	2505	214	214		x10^9/L		2	9	214				ABS	ABS	L	Par	P	Par	21	16	.	237	1	1	N	1	x10^9/L
	ABS	F	HEMA	HEMATOLOGY - LACTATION PERIOD	PLT	PLT	56	Day 56	3	3501	309	309		x10^9/L		3	11	309				ABS	ABS	L	Par	P	Par	21	16	.	237	1	1	N	1	x10^9/L
	ABS	F	HEMA	HEMATOLOGY - LACTATION PERIOD	PLT	PLT	56	Day 56	3	3503	281	281		x10^9/L		3	13	281				ABS	ABS	L	Par	P	Par	21	16	.	237	1	1	N	1	x10^9/L
	ABS	F	HEMA	HEMATOLOGY - LACTATION PERIOD	PLT	PLT	56	Day 56	3	3504	276	276		x10^9/L		3	14	276				ABS	ABS	L	Par	P	Par	21	16	.	237	1	1	N	1	x10^9/L
	ABS	F	HEMA	HEMATOLOGY - LACTATION PERIOD	PLT	PLT	56	Day 56	3	3505	356	356		x10^9/L		3	15	356				ABS	ABS	L	Par	P	Par	21	16	.	237	1	1	N	1	x10^9/L
	ABS	F	HEMA	HEMATOLOGY - LACTATION PERIOD	PLT	PLT	56	Day 56	4	4502	267	267		x10^9/L		4	16	267				ABS	ABS	L	Par	P	Par	21	16	.	237	1	1	N	1	x10^9/L
	ABS	F	HEMA	HEMATOLOGY - LACTATION PERIOD	PLT	PLT	56	Day 56	4	4504	303	303		x10^9/L		4	17	303				ABS	ABS	L	Par	P	Par	21	16	.	237	1	1	N	1	x10^9/L
	ABS	F	HEMA	HEMATOLOGY - LACTATION PERIOD	PLT	PLT	56	Day 56	4	4505	384	384		x10^9/L		4	18	384				ABS	ABS	L	Par	P	Par	21	16	.	237	1	1	N	1	x10^9/L
	ABS	F	HEMA	HEMATOLOGY - LACTATION PERIOD	PLT	PLT	56	Day 56	4	4506	374	374		x10^9/L		4	19	374				ABS	ABS	L	Par	P	Par	21	16	.	237	1	1	N	1	x10^9/L
	ABS	F	HEMA	HEMATOLOGY - LACTATION PERIOD	RBC	RBC	56	Day 56	1	1501	7.17	7.17		x10^12/L		1	1	7.17				ABS	ABS	L	Par	P	Par	21	16	.	229	1	1	N	0.01	x10^12/L
	ABS	F	HEMA	HEMATOLOGY - LACTATION PERIOD	RBC	RBC	56	Day 56	1	1502	7.03	7.03		x10^12/L		1	2	7.03				ABS	ABS	L	Par	P	Par	21	16	.	229	1	1	N	0.01	x10^12/L
	ABS	F	HEMA	HEMATOLOGY - LACTATION PERIOD	RBC	RBC	56	Day 56	1	1503	6.95	6.95		x10^12/L		1	3	6.95				ABS	ABS	L	Par	P	Par	21	16	.	229	1	1	N	0.01	x10^12/L
	ABS	F	HEMA	HEMATOLOGY - LACTATION PERIOD	RBC	RBC	56	Day 56	1	1504	6.62	6.62		x10^12/L		1	4	6.62				ABS	ABS	L	Par	P	Par	21	16	.	229	1	1	N	0.01	x10^12/L
	ABS	F	HEMA	HEMATOLOGY - LACTATION PERIOD	RBC	RBC	56	Day 56	1	1506	8.23	8.23		x10^12/L		1	5	8.23				ABS	ABS	L	Par	P	Par	21	16	.	229	1	1	N	0.01	x10^12/L
	ABS	F	HEMA	HEMATOLOGY - LACTATION PERIOD	RBC	RBC	56	Day 56	2	2501	6.77	6.77		x10^12/L		2	6	6.77				ABS	ABS	L	Par	P	Par	21	16	.	229	1	1	N	0.01	x10^12/L
	ABS	F	HEMA	HEMATOLOGY - LACTATION PERIOD	RBC	RBC	56	Day 56	2	2503	6.78	6.78		x10^12/L		2	7	6.78				ABS	ABS	L	Par	P	Par	21	16	.	229	1	1	N	0.01	x10^12/L
	ABS	F	HEMA	HEMATOLOGY - LACTATION PERIOD	RBC	RBC	56	Day 56	2	2504	8.43	8.43		x10^12/L		2	8	8.43				ABS	ABS	L	Par	P	Par	21	16	.	229	1	1	N	0.01	x10^12/L
	ABS	F	HEMA	HEMATOLOGY - LACTATION PERIOD	RBC	RBC	56	Day 56	2	2505	8.03	8.03		x10^12/L		2	9	8.03				ABS	ABS	L	Par	P	Par	21	16	.	229	1	1	N	0.01	x10^12/L
	ABS	F	HEMA	HEMATOLOGY - LACTATION PERIOD	RBC	RBC	56	Day 56	3	3501	6.4	6.4		x10^12/L		3	11	6.4				ABS	ABS	L	Par	P	Par	21	16	.	229	1	1	N	0.01	x10^12/L
	ABS	F	HEMA	HEMATOLOGY - LACTATION PERIOD	RBC	RBC	56	Day 56	3	3503	6.82	6.82		x10^12/L		3	13	6.82				ABS	ABS	L	Par	P	Par	21	16	.	229	1	1	N	0.01	x10^12/L
	ABS	F	HEMA	HEMATOLOGY - LACTATION PERIOD	RBC	RBC	56	Day 56	3	3504	7.35	7.35		x10^12/L		3	14	7.35				ABS	ABS	L	Par	P	Par	21	16	.	229	1	1	N	0.01	x10^12/L
	ABS	F	HEMA	HEMATOLOGY - LACTATION PERIOD	RBC	RBC	56	Day 56	3	3505	7.48	7.48		x10^12/L		3	15	7.48				ABS	ABS	L	Par	P	Par	21	16	.	229	1	1	N	0.01	x10^12/L
	ABS	F	HEMA	HEMATOLOGY - LACTATION PERIOD	RBC	RBC	56	Day 56	4	4502	6.91	6.91		x10^12/L		4	16	6.91				ABS	ABS	L	Par	P	Par	21	16	.	229	1	1	N	0.01	x10^12/L
	ABS	F	HEMA	HEMATOLOGY - LACTATION PERIOD	RBC	RBC	56	Day 56	4	4504	6.78	6.78		x10^12/L		4	17	6.78				ABS	ABS	L	Par	P	Par	21	16	.	229	1	1	N	0.01	x10^12/L
	ABS	F	HEMA	HEMATOLOGY - LACTATION PERIOD	RBC	RBC	56	Day 56	4	4505	7.23	7.23		x10^12/L		4	18	7.23				ABS	ABS	L	Par	P	Par	21	16	.	229	1	1	N	0.01	x10^12/L
	ABS	F	HEMA	HEMATOLOGY - LACTATION PERIOD	RBC	RBC	56	Day 56	4	4506	7.45	7.45		x10^12/L		4	19	7.45				ABS	ABS	L	Par	P	Par	21	16	.	229	1	1	N	0.01	x10^12/L
	ABS	F	HEMA	HEMATOLOGY - LACTATION PERIOD	RDW	RDW	56	Day 56	1	1501	11.6	11.6		%		1	1	11.6				ABS	ABS	L	Par	P	Par	21	16	.	235	1	1	N	0.1	%
	ABS	F	HEMA	HEMATOLOGY - LACTATION PERIOD	RDW	RDW	56	Day 56	1	1502	13.7	13.7		%		1	2	13.7				ABS	ABS	L	Par	P	Par	21	16	.	235	1	1	N	0.1	%
	ABS	F	HEMA	HEMATOLOGY - LACTATION PERIOD	RDW	RDW	56	Day 56	1	1503	12.9	12.9		%		1	3	12.9				ABS	ABS	L	Par	P	Par	21	16	.	235	1	1	N	0.1	%
	ABS	F	HEMA	HEMATOLOGY - LACTATION PERIOD	RDW	RDW	56	Day 56	1	1504	12.2	12.2		%		1	4	12.2				ABS	ABS	L	Par	P	Par	21	16	.	235	1	1	N	0.1	%
	ABS	F	HEMA	HEMATOLOGY - LACTATION PERIOD	RDW	RDW	56	Day 56	1	1506	11.4	11.4		%		1	5	11.4				ABS	ABS	L	Par	P	Par	21	16	.	235	1	1	N	0.1	%
	ABS	F	HEMA	HEMATOLOGY - LACTATION PERIOD	RDW	RDW	56	Day 56	2	2501	12.5	12.5		%		2	6	12.5				ABS	ABS	L	Par	P	Par	21	16	.	235	1	1	N	0.1	%
	ABS	F	HEMA	HEMATOLOGY - LACTATION PERIOD	RDW	RDW	56	Day 56	2	2503	12.2	12.2		%		2	7	12.2				ABS	ABS	L	Par	P	Par	21	16	.	235	1	1	N	0.1	%
	ABS	F	HEMA	HEMATOLOGY - LACTATION PERIOD	RDW	RDW	56	Day 56	2	2504	13	13		%		2	8	13				ABS	ABS	L	Par	P	Par	21	16	.	235	1	1	N	0.1	%
	ABS	F	HEMA	HEMATOLOGY - LACTATION PERIOD	RDW	RDW	56	Day 56	2	2505	11.8	11.8		%		2	9	11.8				ABS	ABS	L	Par	P	Par	21	16	.	235	1	1	N	0.1	%
	ABS	F	HEMA	HEMATOLOGY - LACTATION PERIOD	RDW	RDW	56	Day 56	3	3501	12.1	12.1		%		3	11	12.1				ABS	ABS	L	Par	P	Par	21	16	.	235	1	1	N	0.1	%
	ABS	F	HEMA	HEMATOLOGY - LACTATION PERIOD	RDW	RDW	56	Day 56	3	3503	14.7	14.7		%		3	13	14.7				ABS	ABS	L	Par	P	Par	21	16	.	235	1	1	N	0.1	%
	ABS	F	HEMA	HEMATOLOGY - LACTATION PERIOD	RDW	RDW	56	Day 56	3	3504	12	12		%		3	14	12				ABS	ABS	L	Par	P	Par	21	16	.	235	1	1	N	0.1	%
	ABS	F	HEMA	HEMATOLOGY - LACTATION PERIOD	RDW	RDW	56	Day 56	3	3505	14	14		%		3	15	14				ABS	ABS	L	Par	P	Par	21	16	.	235	1	1	N	0.1	%
	ABS	F	HEMA	HEMATOLOGY - LACTATION PERIOD	RDW	RDW	56	Day 56	4	4502	11.8	11.8		%		4	16	11.8				ABS	ABS	L	Par	P	Par	21	16	.	235	1	1	N	0.1	%
	ABS	F	HEMA	HEMATOLOGY - LACTATION PERIOD	RDW	RDW	56	Day 56	4	4504	12.8	12.8		%		4	17	12.8				ABS	ABS	L	Par	P	Par	21	16	.	235	1	1	N	0.1	%
	ABS	F	HEMA	HEMATOLOGY - LACTATION PERIOD	RDW	RDW	56	Day 56	4	4505	15.5	15.5		%		4	18	15.5				ABS	ABS	L	Par	P	Par	21	16	.	235	1	1	N	0.1	%
	ABS	F	HEMA	HEMATOLOGY - LACTATION PERIOD	RDW	RDW	56	Day 56	4	4506	12.6	12.6		%		4	19	12.6				ABS	ABS	L	Par	P	Par	21	16	.	235	1	1	N	0.1	%
	ABS	F	HEMA	HEMATOLOGY - LACTATION PERIOD	RETIC	RETIC	56	Day 56	1	1501	20.8	20.8		x10^9/L		1	1	20.8				ABS	ABS	L	Par	P	Par	21	16	.	254	3	3	N	0.1	x10^9/L
	ABS	F	HEMA	HEMATOLOGY - LACTATION PERIOD	RETIC	RETIC	56	Day 56	1	1502	33.2	33.2		x10^9/L		1	2	33.2				ABS	ABS	L	Par	P	Par	21	16	.	254	3	3	N	0.1	x10^9/L
	ABS	F	HEMA	HEMATOLOGY - LACTATION PERIOD	RETIC	RETIC	56	Day 56	1	1503	33.6	33.6		x10^9/L		1	3	33.6				ABS	ABS	L	Par	P	Par	21	16	.	254	3	3	N	0.1	x10^9/L
	ABS	F	HEMA	HEMATOLOGY - LACTATION PERIOD	RETIC	RETIC	56	Day 56	1	1504	33.8	33.8		x10^9/L		1	4	33.8				ABS	ABS	L	Par	P	Par	21	16	.	254	3	3	N	0.1	x10^9/L
	ABS	F	HEMA	HEMATOLOGY - LACTATION PERIOD	RETIC	RETIC	56	Day 56	1	1506	25.6	25.6		x10^9/L		1	5	25.6				ABS	ABS	L	Par	P	Par	21	16	.	254	3	3	N	0.1	x10^9/L
	ABS	F	HEMA	HEMATOLOGY - LACTATION PERIOD	RETIC	RETIC	56	Day 56	2	2501	14	14		x10^9/L		2	6	14				ABS	ABS	L	Par	P	Par	21	16	.	254	3	3	N	0.1	x10^9/L
	ABS	F	HEMA	HEMATOLOGY - LACTATION PERIOD	RETIC	RETIC	56	Day 56	2	2503	15.4	15.4		x10^9/L		2	7	15.4				ABS	ABS	L	Par	P	Par	21	16	.	254	3	3	N	0.1	x10^9/L
	ABS	F	HEMA	HEMATOLOGY - LACTATION PERIOD	RETIC	RETIC	56	Day 56	2	2504	41.2	41.2		x10^9/L		2	8	41.2				ABS	ABS	L	Par	P	Par	21	16	.	254	3	3	N	0.1	x10^9/L
	ABS	F	HEMA	HEMATOLOGY - LACTATION PERIOD	RETIC	RETIC	56	Day 56	2	2505	50.8	50.8		x10^9/L		2	9	50.8				ABS	ABS	L	Par	P	Par	21	16	.	254	3	3	N	0.1	x10^9/L
	ABS	F	HEMA	HEMATOLOGY - LACTATION PERIOD	RETIC	RETIC	56	Day 56	3	3501	29.7	29.7		x10^9/L		3	11	29.7				ABS	ABS	L	Par	P	Par	21	16	.	254	3	3	N	0.1	x10^9/L
	ABS	F	HEMA	HEMATOLOGY - LACTATION PERIOD	RETIC	RETIC	56	Day 56	3	3503	36.6	36.6		x10^9/L		3	13	36.6				ABS	ABS	L	Par	P	Par	21	16	.	254	3	3	N	0.1	x10^9/L
	ABS	F	HEMA	HEMATOLOGY - LACTATION PERIOD	RETIC	RETIC	56	Day 56	3	3504	33.9	33.9		x10^9/L		3	14	33.9				ABS	ABS	L	Par	P	Par	21	16	.	254	3	3	N	0.1	x10^9/L
	ABS	F	HEMA	HEMATOLOGY - LACTATION PERIOD	RETIC	RETIC	56	Day 56	3	3505	28.6	28.6		x10^9/L		3	15	28.6				ABS	ABS	L	Par	P	Par	21	16	.	254	3	3	N	0.1	x10^9/L
	ABS	F	HEMA	HEMATOLOGY - LACTATION PERIOD	RETIC	RETIC	56	Day 56	4	4502	18.2	18.2		x10^9/L		4	16	18.2				ABS	ABS	L	Par	P	Par	21	16	.	254	3	3	N	0.1	x10^9/L
	ABS	F	HEMA	HEMATOLOGY - LACTATION PERIOD	RETIC	RETIC	56	Day 56	4	4504	19.2	19.2		x10^9/L		4	17	19.2				ABS	ABS	L	Par	P	Par	21	16	.	254	3	3	N	0.1	x10^9/L
	ABS	F	HEMA	HEMATOLOGY - LACTATION PERIOD	RETIC	RETIC	56	Day 56	4	4505	14.8	14.8		x10^9/L		4	18	14.8				ABS	ABS	L	Par	P	Par	21	16	.	254	3	3	N	0.1	x10^9/L
	ABS	F	HEMA	HEMATOLOGY - LACTATION PERIOD	RETIC	RETIC	56	Day 56	4	4506	53.7	53.7		x10^9/L		4	19	53.7				ABS	ABS	L	Par	P	Par	21	16	.	254	3	3	N	0.1	x10^9/L
	ABS	F	HEMA	HEMATOLOGY - LACTATION PERIOD	WBC	WBC	56	Day 56	1	1501	5.08	5.08		x10^9/L		1	1	5.08				ABS	ABS	L	Par	P	Par	21	16	.	241	2	2	N	0.01	x10^9/L
	ABS	F	HEMA	HEMATOLOGY - LACTATION PERIOD	WBC	WBC	56	Day 56	1	1502	8.76	8.76		x10^9/L		1	2	8.76				ABS	ABS	L	Par	P	Par	21	16	.	241	2	2	N	0.01	x10^9/L
	ABS	F	HEMA	HEMATOLOGY - LACTATION PERIOD	WBC	WBC	56	Day 56	1	1503	7.51	7.51		x10^9/L		1	3	7.51				ABS	ABS	L	Par	P	Par	21	16	.	241	2	2	N	0.01	x10^9/L
	ABS	F	HEMA	HEMATOLOGY - LACTATION PERIOD	WBC	WBC	56	Day 56	1	1504	9.46	9.46		x10^9/L		1	4	9.46				ABS	ABS	L	Par	P	Par	21	16	.	241	2	2	N	0.01	x10^9/L
	ABS	F	HEMA	HEMATOLOGY - LACTATION PERIOD	WBC	WBC	56	Day 56	1	1506	6.78	6.78		x10^9/L		1	5	6.78				ABS	ABS	L	Par	P	Par	21	16	.	241	2	2	N	0.01	x10^9/L
	ABS	F	HEMA	HEMATOLOGY - LACTATION PERIOD	WBC	WBC	56	Day 56	2	2501	8.01	8.01		x10^9/L		2	6	8.01				ABS	ABS	L	Par	P	Par	21	16	.	241	2	2	N	0.01	x10^9/L
	ABS	F	HEMA	HEMATOLOGY - LACTATION PERIOD	WBC	WBC	56	Day 56	2	2503	7.22	7.22		x10^9/L		2	7	7.22				ABS	ABS	L	Par	P	Par	21	16	.	241	2	2	N	0.01	x10^9/L
	ABS	F	HEMA	HEMATOLOGY - LACTATION PERIOD	WBC	WBC	56	Day 56	2	2504	8.03	8.03		x10^9/L		2	8	8.03				ABS	ABS	L	Par	P	Par	21	16	.	241	2	2	N	0.01	x10^9/L
	ABS	F	HEMA	HEMATOLOGY - LACTATION PERIOD	WBC	WBC	56	Day 56	2	2505	7.53	7.53		x10^9/L		2	9	7.53				ABS	ABS	L	Par	P	Par	21	16	.	241	2	2	N	0.01	x10^9/L
	ABS	F	HEMA	HEMATOLOGY - LACTATION PERIOD	WBC	WBC	56	Day 56	3	3501	8.62	8.62		x10^9/L		3	11	8.62				ABS	ABS	L	Par	P	Par	21	16	.	241	2	2	N	0.01	x10^9/L
	ABS	F	HEMA	HEMATOLOGY - LACTATION PERIOD	WBC	WBC	56	Day 56	3	3503	11.79	11.79		x10^9/L		3	13	11.79				ABS	ABS	L	Par	P	Par	21	16	.	241	2	2	N	0.01	x10^9/L
	ABS	F	HEMA	HEMATOLOGY - LACTATION PERIOD	WBC	WBC	56	Day 56	3	3504	9.56	9.56		x10^9/L		3	14	9.56				ABS	ABS	L	Par	P	Par	21	16	.	241	2	2	N	0.01	x10^9/L
	ABS	F	HEMA	HEMATOLOGY - LACTATION PERIOD	WBC	WBC	56	Day 56	3	3505	9.73	9.73		x10^9/L		3	15	9.73				ABS	ABS	L	Par	P	Par	21	16	.	241	2	2	N	0.01	x10^9/L
	ABS	F	HEMA	HEMATOLOGY - LACTATION PERIOD	WBC	WBC	56	Day 56	4	4502	6.23	6.23		x10^9/L		4	16	6.23				ABS	ABS	L	Par	P	Par	21	16	.	241	2	2	N	0.01	x10^9/L
	ABS	F	HEMA	HEMATOLOGY - LACTATION PERIOD	WBC	WBC	56	Day 56	4	4504	7.76	7.76		x10^9/L		4	17	7.76				ABS	ABS	L	Par	P	Par	21	16	.	241	2	2	N	0.01	x10^9/L
	ABS	F	HEMA	HEMATOLOGY - LACTATION PERIOD	WBC	WBC	56	Day 56	4	4505	8.82	8.82		x10^9/L		4	18	8.82				ABS	ABS	L	Par	P	Par	21	16	.	241	2	2	N	0.01	x10^9/L
	ABS	F	HEMA	HEMATOLOGY - LACTATION PERIOD	WBC	WBC	56	Day 56	4	4506	9.53	9.53		x10^9/L		4	19	9.53				ABS	ABS	L	Par	P	Par	21	16	.	241	2	2	N	0.01	x10^9/L
