# Supplementary material for: Safety of a novel feed ingredient, Algal Oil containing EPA and DHA, in a gestation-lactation-growth feeding study in Beagle dogs
Source: PLoS One. 2019 Jun 3;14(6):e0217794. doi: 10.1371/journal.pone.0217794 (PMC6546231; doi:10.1371/journal.pone.0217794)
Supplement: S6 Table — (XLSX) [file pone.0217794.s006.xlsx]

## Sheet: Pre-weaning-Combined
Citoxlab North America Study No.: 2016-3002
GENERATION F1, LACTATION
PUP_SEX	ACTIVITY	PARAMETER	GROUP	L_GROUP	OCCASION	L_OCCASION	Mean	SEM	Mean-SEM	Mean+SEM
MALE AND FEMALE PUPS COMBINED	HD	HEAD	1	Group 1: Control	7	Day 7	15.525	0.46503	15.06	15.99
MALE AND FEMALE PUPS COMBINED	HD	HEAD	2	Group 2: AOCED 0.75%	7	Day 7	17.3125	0.1301	17.1824	17.4426
MALE AND FEMALE PUPS COMBINED	HD	HEAD	3	Group 3: AOCED 1.5%	7	Day 7	17.0313	0.54097	16.4903	17.5722
MALE AND FEMALE PUPS COMBINED	HD	HEAD	4	Group 4: AOCED 3.0%	7	Day 7	15.4375	0.37326	15.0642	15.8108
MALE AND FEMALE PUPS COMBINED	HD	HEAD	1	Group 1: Control	14	Day 14	18.3667	0.26628	18.1004	18.6329
MALE AND FEMALE PUPS COMBINED	HD	HEAD	2	Group 2: AOCED 0.75%	14	Day 14	19.6563	0.2001	19.4562	19.8563
MALE AND FEMALE PUPS COMBINED	HD	HEAD	3	Group 3: AOCED 1.5%	14	Day 14	20.2188	0.98607	19.2327	21.2048
MALE AND FEMALE PUPS COMBINED	HD	HEAD	4	Group 4: AOCED 3.0%	14	Day 14	17.7188	0.2065	17.5122	17.9253
MALE AND FEMALE PUPS COMBINED	HD	HEAD	1	Group 1: Control	21	Day 21	20.8083	0.41113	20.3972	21.2195
MALE AND FEMALE PUPS COMBINED	HD	HEAD	2	Group 2: AOCED 0.75%	21	Day 21	21.0625	0.31664	20.7459	21.3791
MALE AND FEMALE PUPS COMBINED	HD	HEAD	3	Group 3: AOCED 1.5%	21	Day 21	21.5938	0.6948	20.8989	22.2886
MALE AND FEMALE PUPS COMBINED	HD	HEAD	4	Group 4: AOCED 3.0%	21	Day 21	20.5625	0.29092	20.2716	20.8534
MALE AND FEMALE PUPS COMBINED	HD	HEAD	1	Group 1: Control	28	Day 28	21.6167	0.48258	21.1341	22.0992
MALE AND FEMALE PUPS COMBINED	HD	HEAD	2	Group 2: AOCED 0.75%	28	Day 28	22.8438	0.75411	22.0896	23.5979
MALE AND FEMALE PUPS COMBINED	HD	HEAD	3	Group 3: AOCED 1.5%	28	Day 28	21.8889	0.51726	21.3716	22.4061
MALE AND FEMALE PUPS COMBINED	HD	HEAD	4	Group 4: AOCED 3.0%	28	Day 28	22.2813	0.91198	21.3693	23.1932
MALE AND FEMALE PUPS COMBINED	HD	HEAD	1	Group 1: Control	35	Day 35	23.0667	0.61387	22.4528	23.6805
MALE AND FEMALE PUPS COMBINED	HD	HEAD	2	Group 2: AOCED 0.75%	35	Day 35	24.875	0.59512	24.2799	25.4701
MALE AND FEMALE PUPS COMBINED	HD	HEAD	3	Group 3: AOCED 1.5%	35	Day 35	23.7188	0.24139	23.4774	23.9601
MALE AND FEMALE PUPS COMBINED	HD	HEAD	4	Group 4: AOCED 3.0%	35	Day 35	22.9688	0.73132	22.2374	23.7001
MALE AND FEMALE PUPS COMBINED	HD	HEAD	1	Group 1: Control	42	Day 42	24.1333	0.35439	23.7789	24.4877
MALE AND FEMALE PUPS COMBINED	HD	HEAD	2	Group 2: AOCED 0.75%	42	Day 42	25.4688	0.50098	24.9678	25.9697
MALE AND FEMALE PUPS COMBINED	HD	HEAD	3	Group 3: AOCED 1.5%	42	Day 42	24.625	0.21651	24.4085	24.8415
MALE AND FEMALE PUPS COMBINED	HD	HEAD	4	Group 4: AOCED 3.0%	42	Day 42	23.875	0.74826	23.1267	24.6233
MALE AND FEMALE PUPS COMBINED	HD	HEAD	1	Group 1: Control	49	Day 49	25.0417	0.14313	24.8985	25.1848
MALE AND FEMALE PUPS COMBINED	HD	HEAD	2	Group 2: AOCED 0.75%	49	Day 49	25.6563	0.36931	25.2869	26.0256
MALE AND FEMALE PUPS COMBINED	HD	HEAD	3	Group 3: AOCED 1.5%	49	Day 49	25.3125	0.45786	24.8546	25.7704
MALE AND FEMALE PUPS COMBINED	HD	HEAD	4	Group 4: AOCED 3.0%	49	Day 49	24.9375	0.48547	24.452	25.423
MALE AND FEMALE PUPS COMBINED	HD	HEAD	1	Group 1: Control	56	Day 56	25.825	0.17941	25.6456	26.0044
MALE AND FEMALE PUPS COMBINED	HD	HEAD	2	Group 2: AOCED 0.75%	56	Day 56	26.5313	0.36931	26.1619	26.9006
MALE AND FEMALE PUPS COMBINED	HD	HEAD	3	Group 3: AOCED 1.5%	56	Day 56	26.0938	0.25706	25.8367	26.3508
MALE AND FEMALE PUPS COMBINED	HD	HEAD	4	Group 4: AOCED 3.0%	56	Day 56	25.5833	0.30619	25.2771	25.8895
